# Supplementary material for: Mapping local patterns of childhood overweight and wasting in low- and middle-income countries between 2000 and 2017
Source: Springer Nature journal article supplement (doi:10.1038/s41591-020-0807-6), 2020-04-20
Supplement: MOESM1 [file 41591_2020_807_MOESM1_ESM.pdf]

In the format provided by the authors and unedited.

**OPEN**

# Mapping local patterns of childhood overweight and wasting in low- and middle-income countries between 2000 and 2017

LBD Double Burden of Malnutrition Collaborators\*

---

\*A list of authors and their affiliations appears online. <sup>✉</sup>e-mail: [sihay@uw.edu](mailto:sihay@uw.edu)

# Mapping local patterns of childhood overweight and wasting in low- and middle-income countries between 2000 and 2017

## Supplementary Information

### Table of Contents

|    |                                                                                                         |    |
|----|---------------------------------------------------------------------------------------------------------|----|
| 5  | <b>List of Supplementary Tables</b> .....                                                               | 2  |
|    | <b>1.0 Guidelines for Accurate and Transparent Health Estimates Reporting (GATHER) Compliance</b> ..... | 3  |
|    | <b>2.0 Data</b> .....                                                                                   | 4  |
|    | 2.1 DBM Indicator Definitions, Sociodemographic Index (SDI) Classification .....                        | 4  |
|    | 2.2 Data Sources .....                                                                                  | 8  |
| 10 | 2.3 Covariates.....                                                                                     | 33 |
|    | <b>3.0 Model Results</b> .....                                                                          | 39 |
|    | <b>4.0 Model Validation</b> .....                                                                       | 47 |
|    | 4.1 Overweight validation metrics.....                                                                  | 47 |
|    | 4.2 Wasting validation metrics .....                                                                    | 48 |
| 15 | <b>5.0 Supplementary References</b> .....                                                               | 49 |
|    | <b>6.0 Author Contributions</b> .....                                                                   | 49 |

|    |                                                                                                                                        |           |
|----|----------------------------------------------------------------------------------------------------------------------------------------|-----------|
| 20 | List of Supplementary Tables                                                                                                           |           |
|    | <b>Supplementary Table 1: Guidelines for Accurate and Transparent Health Estimates Reporting (GATHER) checklist<sup>1</sup>.....</b>   | <b>3</b>  |
|    | <b>Supplementary Table 2: Countries included in model.....</b>                                                                         | <b>5</b>  |
|    | <b>Supplementary Table 3: Household surveys used in mapping.....</b>                                                                   | <b>8</b>  |
| 25 | <b>Supplementary Table 4: Survey Reports added to model.....</b>                                                                       | <b>26</b> |
|    | <b>Supplementary Table 5: Data excluded from model.....</b>                                                                            | <b>29</b> |
|    | <b>Supplementary Table 6: Covariates used in mapping.....</b>                                                                          | <b>33</b> |
|    | <b>Supplementary Table 7: Model prior sensitivity analyses.....</b>                                                                    | <b>37</b> |
|    | <b>Supplementary Table 8: Spatial hyperparameter priors by region.....</b>                                                             | <b>38</b> |
| 30 | <b>Supplementary Table 9: Overweight fitted parameters.....</b>                                                                        | <b>39</b> |
|    | <b>Supplementary Table 10: Wasting fitted parameters.....</b>                                                                          | <b>40</b> |
|    | <b>Supplementary Table 11: Change of overweight and wasting from 2000 to 2017 at the first administrative level in all LMICs.....</b>  | <b>42</b> |
| 35 | <b>Supplementary Table 12: Change of overweight and wasting from 2000 to 2017 at the second administrative level in all LMICs.....</b> | <b>44</b> |
|    | <b>Supplementary Table 13: Predictive metrics for overweight aggregated to admin 0.....</b>                                            | <b>47</b> |
|    | <b>Supplementary Table 14: Predictive metrics for overweight aggregated to admin 1.....</b>                                            | <b>47</b> |
|    | <b>Supplementary Table 15: Predictive metrics for overweight aggregated to admin 2.....</b>                                            | <b>47</b> |
|    | <b>Supplementary Table 16: Predictive metrics for wasting aggregated to admin 0.....</b>                                               | <b>48</b> |
| 40 | <b>Supplementary Table 17: Predictive metrics for wasting aggregated to admin 1.....</b>                                               | <b>48</b> |
|    | <b>Supplementary Table 18: Predictive metrics for wasting aggregated to admin 2.....</b>                                               | <b>48</b> |

## 1.0 Guidelines for Accurate and Transparent Health Estimates

### 45 Reporting (GATHER) Compliance

**Supplementary Table 1: Guidelines for Accurate and Transparent Health Estimates Reporting (GATHER) checklist<sup>1</sup>.**

| Item #                                                                                                       | Checklist item                                                                                                                                                                                                                                                                                                                                                                            | Reported                                                                                                                                                                                                                                                      |
|--------------------------------------------------------------------------------------------------------------|-------------------------------------------------------------------------------------------------------------------------------------------------------------------------------------------------------------------------------------------------------------------------------------------------------------------------------------------------------------------------------------------|---------------------------------------------------------------------------------------------------------------------------------------------------------------------------------------------------------------------------------------------------------------|
| <b>Objectives and funding</b>                                                                                |                                                                                                                                                                                                                                                                                                                                                                                           |                                                                                                                                                                                                                                                               |
| 1                                                                                                            | Define the indicator(s), populations (including age, sex, and geographic entities), and time period(s) for which estimates were made.                                                                                                                                                                                                                                                     | Main text: Introduction, Methods (Data)                                                                                                                                                                                                                       |
| 2                                                                                                            | List the funding sources for the work.                                                                                                                                                                                                                                                                                                                                                    | Main text: Acknowledgements                                                                                                                                                                                                                                   |
| <b>Data Inputs</b>                                                                                           |                                                                                                                                                                                                                                                                                                                                                                                           |                                                                                                                                                                                                                                                               |
| <b><i>For all data inputs from multiple sources that are synthesized as part of the study:</i></b>           |                                                                                                                                                                                                                                                                                                                                                                                           |                                                                                                                                                                                                                                                               |
| 3                                                                                                            | Describe how the data were identified and how the data were accessed.                                                                                                                                                                                                                                                                                                                     | Main text: Methods (Data: Surveys and child anthropometry data), Supplementary Information: 2.0 Data                                                                                                                                                          |
| 4                                                                                                            | Specify the inclusion and exclusion criteria. Identify all ad-hoc exclusions.                                                                                                                                                                                                                                                                                                             | Main text: Methods (Overview; Data: Surveys and child anthropometry data), Supplementary Information: 2.2 Data Sources; Supplementary Table 5                                                                                                                 |
| 5                                                                                                            | Provide information on all included data sources and their main characteristics. For each data source used, report reference information or contact name/institution, population represented, data collection method, year(s) of data collection, sex and age range, diagnostic criteria or measurement method, and sample size, as relevant.                                             | Supplementary Information: 2.0 Data                                                                                                                                                                                                                           |
| 6                                                                                                            | Identify and describe any categories of input data that have potentially important biases (e.g., based on characteristics listed in item 5).                                                                                                                                                                                                                                              | Main text: Limitations; Supplementary Table 5                                                                                                                                                                                                                 |
| <b><i>For data inputs that contribute to the analysis but were not synthesized as part of the study:</i></b> |                                                                                                                                                                                                                                                                                                                                                                                           |                                                                                                                                                                                                                                                               |
| 7                                                                                                            | Describe and give sources for any other data inputs.                                                                                                                                                                                                                                                                                                                                      | Main text: Methods (Data: Spatial covariates)                                                                                                                                                                                                                 |
| <b><i>For all data inputs:</i></b>                                                                           |                                                                                                                                                                                                                                                                                                                                                                                           |                                                                                                                                                                                                                                                               |
| 8                                                                                                            | Provide all data inputs in a file format from which data can be efficiently extracted (e.g., a spreadsheet rather than a PDF), including all relevant meta-data listed in item 5. For any data inputs that cannot be shared because of ethical or legal reasons, such as third-party ownership, provide a contact name or the name of the institution that retains the right to the data. | Available at <a href="http://ghdx.healthdata.org/record/af-rica-child-growth-failure-geospatial-estimates-2000-2015">http://ghdx.healthdata.org/record/af-rica-child-growth-failure-geospatial-estimates-2000-2015</a><br>Supplementary Information: 2.0 Data |

| <b>Data analysis</b>          |                                                                                                                                                                                                                                                                         |                                                                                                                                                                                                                                                                            |
|-------------------------------|-------------------------------------------------------------------------------------------------------------------------------------------------------------------------------------------------------------------------------------------------------------------------|----------------------------------------------------------------------------------------------------------------------------------------------------------------------------------------------------------------------------------------------------------------------------|
| <b>9</b>                      | Provide a conceptual overview of the data analysis method. A diagram may be helpful.                                                                                                                                                                                    | Main text: Methods (citation to previously published diagram included).                                                                                                                                                                                                    |
| <b>10</b>                     | Provide a detailed description of all steps of the analysis, including mathematical formulae. This description should cover, as relevant, data cleaning, data pre-processing, data adjustments and weighting of data sources, and mathematical or statistical model(s). | Main text: Methods                                                                                                                                                                                                                                                         |
| <b>11</b>                     | Describe how candidate models were evaluated and how the final model(s) were selected.                                                                                                                                                                                  | Main text: Methods                                                                                                                                                                                                                                                         |
| <b>12</b>                     | Provide the results of an evaluation of model performance, if done, as well as the results of any relevant sensitivity analysis.                                                                                                                                        | Main text: Methods (Analysis: Model validation); Supplementary Information: 4.0 Model Validation                                                                                                                                                                           |
| <b>13</b>                     | Describe methods for calculating uncertainty of the estimates. State which sources of uncertainty were, and were not, accounted for in the uncertainty analysis.                                                                                                        | Main text: Methods (Analysis: Geostatistical model)                                                                                                                                                                                                                        |
| <b>14</b>                     | State how analytic or statistical source code used to generate estimates can be accessed.                                                                                                                                                                               | Available at <a href="http://ghdx.healthdata.org/record/af-rica-child-growth-failure-geospatial-estimates-2000-2015">http://ghdx.healthdata.org/record/af-rica-child-growth-failure-geospatial-estimates-2000-2015</a>                                                     |
| <b>Results and Discussion</b> |                                                                                                                                                                                                                                                                         |                                                                                                                                                                                                                                                                            |
| <b>15</b>                     | Provide published estimates in a file format from which data can be efficiently extracted.                                                                                                                                                                              | Raster files for spatial data and CSVs of estimates available at <a href="http://ghdx.healthdata.org/record/af-rica-child-growth-failure-geospatial-estimates-2000-2015">http://ghdx.healthdata.org/record/af-rica-child-growth-failure-geospatial-estimates-2000-2015</a> |
| <b>16</b>                     | Report a quantitative measure of the uncertainty of the estimates (e.g. uncertainty intervals).                                                                                                                                                                         | Main text: Methods; Figs 1d, 2d; Extended Data Fig 1d                                                                                                                                                                                                                      |
| <b>17</b>                     | Interpret results in light of existing evidence. If updating a previous set of estimates, describe the reasons for changes in estimates.                                                                                                                                | Main text: Global and local variation in malnutrition trends; Prospects for reaching 2025 targets                                                                                                                                                                          |
| <b>18</b>                     | Discuss limitations of the estimates. Include a discussion of any modelling assumptions or data limitations that affect interpretation of the estimates.                                                                                                                | Main text: Discussion                                                                                                                                                                                                                                                      |

50

## 2.0 Data

### 2.1 DBM Indicator Definitions, Sociodemographic Index (SDI) Classification

55 We modelled the prevalence of double burden of malnutrition (DBM) indicators (overweight and wasting) in 105 low- and middle-income countries (LMICs) from 2000 to 2017. These countries were determined by their Sociodemographic Index (SDI), a summary measure of development that combines education, fertility, and poverty, as described by the Global Burden of Disease

(GBD) study<sup>2</sup>. Countries were assigned stages based on their SDI quintile, as well as their geographic continuity. The 105 LMICs (low and middle income countries) modelled in this study are described below, along with their SDI and SDI quintile (e.g., low, low-middle, middle) (Supplementary Table 2). French Guiana and Western Sahara were not modelled by GBD and therefore do not have a calculated SDI, but were included in this study for geographic continuity. China, Iran, Libya, and Malaysia were included despite high-middle SDI status for geographic continuity. Albania and Moldova were excluded despite their middle SDI status due to geographic discontinuity with other included countries and lack of available survey data. We did not estimate for the island nations of American Samoa, Federated States of Micronesia, Fiji, Kiribati, Marshall Islands, North Korea, Samoa, Solomon Islands, or Tonga, where no survey data could be sourced.

**Supplementary Table 2: Countries included in model.**

| Country                          | Stage | SDI    | SDI Quintile    |
|----------------------------------|-------|--------|-----------------|
| Afghanistan                      | 2     | 0.2903 | Low SDI         |
| Algeria                          | 1     | 0.6958 | Middle SDI      |
| Angola                           | 1     | 0.4605 | Low-middle SDI  |
| Bangladesh                       | 2     | 0.4580 | Low SDI         |
| Belize                           | 2     | 0.6022 | Low-middle SDI  |
| Benin                            | 1     | 0.3734 | Low SDI         |
| Bhutan                           | 2     | 0.5699 | Low-middle SDI  |
| Bolivia                          | 2     | 0.5874 | Low-middle SDI  |
| Botswana                         | 1     | 0.6632 | Middle SDI      |
| Brazil                           | 2     | 0.6633 | Middle SDI      |
| Burkina Faso                     | 1     | 0.2839 | Low SDI         |
| Burundi                          | 1     | 0.3097 | Low SDI         |
| Cambodia                         | 2     | 0.4816 | Low-middle SDI  |
| Cameroon                         | 1     | 0.4820 | Low-middle SDI  |
| Cape Verde                       | 1     | 0.5491 | Low-middle SDI  |
| Central African Republic         | 1     | 0.3344 | Low SDI         |
| Chad                             | 1     | 0.2529 | Low SDI         |
| China                            | 2     | 0.7073 | High-middle SDI |
| Colombia                         | 2     | 0.6337 | Middle SDI      |
| Comoros                          | 1     | 0.4343 | Low SDI         |
| Costa Rica                       | 2     | 0.6621 | Middle SDI      |
| Côte d'Ivoire                    | 1     | 0.4121 | Low SDI         |
| Cuba                             | 2     | 0.6877 | Middle SDI      |
| Democratic Republic of the Congo | 1     | 0.3645 | Low SDI         |
| Djibouti                         | 1     | 0.4848 | Low-middle SDI  |
| Dominican Republic               | 2     | 0.5926 | Low-middle SDI  |
| Ecuador                          | 2     | 0.6356 | Middle SDI      |
| Egypt                            | 1     | 0.6043 | Low-middle SDI  |

| Country           | Stage | SDI    | SDI Quintile    |
|-------------------|-------|--------|-----------------|
| El Salvador       | 2     | 0.5931 | Low-middle SDI  |
| Equatorial Guinea | 1     | 0.6252 | Middle SDI      |
| Eritrea           | 1     | 0.4088 | Low SDI         |
| Ethiopia          | 1     | 0.3342 | Low SDI         |
| French Guiana     | 2     | NA     | NA              |
| Gabon             | 1     | 0.6506 | Middle SDI      |
| Ghana             | 1     | 0.5370 | Low-middle SDI  |
| Guatemala         | 2     | 0.5242 | Low-middle SDI  |
| Guinea            | 1     | 0.3247 | Low SDI         |
| Guinea-Bissau     | 1     | 0.3490 | Low SDI         |
| Guyana            | 2     | 0.5837 | Low-middle SDI  |
| Haiti             | 2     | 0.4417 | Low SDI         |
| Honduras          | 2     | 0.5123 | Low-middle SDI  |
| India             | 2     | 0.5502 | Low-middle SDI  |
| Indonesia         | 2     | 0.6476 | Middle SDI      |
| Iran              | 2     | 0.7001 | High-middle SDI |
| Iraq              | 2     | 0.5848 | Low-middle SDI  |
| Jamaica           | 2     | 0.6785 | Middle SDI      |
| Jordan            | 2     | 0.6968 | Middle SDI      |
| Kenya             | 1     | 0.4995 | Low-middle SDI  |
| Kyrgyzstan        | 2     | 0.6066 | Low-middle SDI  |
| Laos              | 2     | 0.5188 | Low-middle SDI  |
| Lesotho           | 1     | 0.4934 | Low-middle SDI  |
| Liberia           | 1     | 0.3284 | Low SDI         |
| Libya             | 1     | 0.7609 | High-middle SDI |
| Madagascar        | 1     | 0.3308 | Low SDI         |
| Malawi            | 1     | 0.3493 | Low SDI         |
| Malaysia          | 2     | 0.7592 | High-middle SDI |
| Mali              | 1     | 0.2669 | Low SDI         |
| Mauritania        | 1     | 0.4706 | Low-middle SDI  |
| Mexico            | 2     | 0.6284 | Middle SDI      |
| Mongolia          | 2     | 0.6619 | Middle SDI      |
| Morocco           | 1     | 0.5792 | Low-middle SDI  |
| Mozambique        | 1     | 0.3405 | Low SDI         |
| Myanmar           | 2     | 0.5558 | Low-middle SDI  |
| Namibia           | 1     | 0.6158 | Middle SDI      |
| Nepal             | 2     | 0.4285 | Low SDI         |
| Nicaragua         | 2     | 0.5296 | Low-middle SDI  |
| Niger             | 1     | 0.1906 | Low SDI         |
| Nigeria           | 1     | 0.4934 | Low-middle SDI  |
| Pakistan          | 2     | 0.4922 | Low-middle SDI  |
| Palestine         | 2     | 0.5414 | Low-middle SDI  |

| Country               | Stage | SDI    | SDI Quintile   |
|-----------------------|-------|--------|----------------|
| Panama                | 2     | 0.6770 | Middle SDI     |
| Papua New Guinea      | 2     | 0.4190 | Low SDI        |
| Paraguay              | 2     | 0.6188 | Middle SDI     |
| Peru                  | 2     | 0.6358 | Middle SDI     |
| Philippines           | 2     | 0.6172 | Middle SDI     |
| Republic of the Congo | 1     | 0.5741 | Low-middle SDI |
| Rwanda                | 1     | 0.4074 | Low SDI        |
| São Tomé and Príncipe | 1     | 0.4883 | Low-middle SDI |
| Senegal               | 1     | 0.3730 | Low SDI        |
| Sierra Leone          | 1     | 0.3572 | Low SDI        |
| Somalia               | 1     | 0.2348 | Low SDI        |
| South Africa          | 1     | 0.6765 | Middle SDI     |
| South Sudan           | 1     | 0.2747 | Low SDI        |
| Sri Lanka             | 2     | 0.6797 | Middle SDI     |
| Sudan                 | 1     | 0.4779 | Low-middle SDI |
| Suriname              | 2     | 0.6410 | Middle SDI     |
| Swaziland             | 1     | 0.5777 | Low-middle SDI |
| Syria                 | 2     | 0.6111 | Middle SDI     |
| Tajikistan            | 2     | 0.5226 | Low-middle SDI |
| Tanzania              | 1     | 0.4122 | Low SDI        |
| Thailand              | 2     | 0.6843 | Middle SDI     |
| The Gambia            | 1     | 0.4048 | Low SDI        |
| Timor-Leste           | 2     | 0.5048 | Low-middle SDI |
| Togo                  | 1     | 0.4133 | Low SDI        |
| Trinidad and Tobago   | 2     | 0.6984 | Middle SDI     |
| Tunisia               | 1     | 0.6754 | Middle SDI     |
| Turkmenistan          | 2     | 0.6964 | Middle SDI     |
| Uganda                | 1     | 0.3877 | Low SDI        |
| Uzbekistan            | 2     | 0.6295 | Middle SDI     |
| Venezuela             | 2     | 0.6554 | Middle SDI     |
| Vietnam               | 2     | 0.6068 | Middle SDI     |
| Western Sahara        | 1     | NA     | NA             |
| Yemen                 | 2     | 0.4295 | Low SDI        |
| Zambia                | 1     | 0.4722 | Low-middle SDI |
| Zimbabwe              | 1     | 0.4632 | Low-middle SDI |

## 2.2 Data Sources

75 The data sources used to model overweight and wasting indicators are described below. Information on survey locations, years, source, and number of individuals, polygons, and/or geo-positioned clusters can be found in Supplementary Tables 3 and 4. Excluded datasets and reasons for their exclusion from our analysis are detailed in Supplementary Table 5.

### Supplementary Table 3: Household surveys used in mapping.

Number identification (NID) can be used to locate a particular data source in the Global Health Data Exchange (GHDx) at <http://ghdx.healthdata.org/>.

*†Data source is not publicly available due to restrictions by the data provider and was used under license for the current study.*

80 All data sources included in this study are cited unless prohibited by original data holder.

| Country    | Survey year(s) | Survey Name                                            | Number of Individuals | Number of geo-positioned clusters | Number of polygons (areal) | GHDx NID         |
|------------|----------------|--------------------------------------------------------|-----------------------|-----------------------------------|----------------------------|------------------|
| Algeria    | 2002–2003      | Algeria Family Health Survey 2002–2003                 | 4754                  | 0                                 | 47                         | 627 <sup>†</sup> |
| Algeria    | 2012–2013      | Algeria Multiple Indicator Cluster Survey 2012–2013    | 13909                 | 0                                 | 7                          | 210614           |
| Angola     | 2001           | Angola Multiple Indicator Cluster Survey 2001          | 5461                  | 0                                 | 18                         | 687              |
| Angola     | 2015–2016      | Angola Demographic and Health Survey 2015–2016         | 6583                  | 625                               | 0                          | 218555           |
| Bangladesh | 1999–2000      | Bangladesh Demographic and Health Survey 1999–2000     | 5970                  | 341                               | 0                          | 26826            |
| Bangladesh | 2004           | Bangladesh Demographic and Health Survey 2004          | 6186                  | 359                               | 0                          | 18902            |
| Bangladesh | 2007           | Bangladesh Demographic and Health Survey 2007          | 5531                  | 361                               | 0                          | 18913            |
| Bangladesh | 2011–2012      | Bangladesh Demographic and Health Survey 2011–2012     | 7992                  | 600                               | 0                          | 55956            |
| Bangladesh | 2012–2013      | Bangladesh Multiple Indicator Cluster Survey 2012–2013 | 19397                 | 2625                              | 0                          | 151086           |
| Bangladesh | 2014           | Bangladesh Demographic and Health Survey 2014          | 7341                  | 0                                 | 7                          | 157021           |
| Belize     | 2006           | Belize Multiple Indicator Cluster Survey 2006          | 770                   | 0                                 | 6                          | 1089             |
| Belize     | 2011           | Belize Multiple Indicator Cluster Survey 2011          | 1831                  | 0                                 | 7                          | 76699            |
| Belize     | 2015–2016      | Belize Multiple Indicator Cluster Survey 2015–2016     | 2448                  | 0                                 | 6                          | 264910           |
| Benin      | 2001           | Benin Demographic and Health Survey 2001               | 4533                  | 247                               | 0                          | 18950            |
| Benin      | 2006           | Benin Demographic and Health Survey 2006               | 13517                 | 0                                 | 12                         | 18959            |

| Country      | Survey year(s) | Survey Name                                                                   | Number of Individuals | Number of geo-positioned clusters | Number of polygons (areal) | GHDx NID            |
|--------------|----------------|-------------------------------------------------------------------------------|-----------------------|-----------------------------------|----------------------------|---------------------|
| Benin        | 2014           | Benin Multiple Indicator Cluster Survey 2014                                  | 12113                 | 0                                 | 12                         | 206075              |
| Benin        | 2017–2018      | Benin Demographic and Health Survey 2017–2018                                 | 11832                 | 540                               | 0                          | 218565              |
| Bhutan       | 2010           | Bhutan Multiple Indicator Cluster Survey 2010                                 | 6171                  | 0                                 | 20                         | 40028               |
| Bolivia      | 2003–2004      | Bolivia Demographic and Health Survey 2003–2004                               | 9396                  | 0                                 | 8                          | 19001               |
| Bolivia      | 2008           | Bolivia Demographic and Health Survey 2008                                    | 7880                  | 986                               | 0                          | 19016               |
| Bolivia      | 2012           | Bolivia Health and Nutrition Assessment Survey 2012                           | 10941                 | 7320                              | 0                          | 285880              |
| Botswana     | 2000           | Botswana Multiple Indicator Cluster Survey 2000                               | 2877                  | 0                                 | 14                         | 1404                |
| Botswana     | 2007–2008      | Botswana Family Health Survey 2007–2008                                       | 2167                  | 0                                 | 323                        | 22125 <sup>†</sup>  |
| Brazil       | 2002–2003      | Brazil Consumer Expenditure Survey 2002–2003                                  | 17411                 | 0                                 | 27                         | 33019               |
| Brazil       | 2006–2007      | Brazil National Demographic and Health Survey of Children and Women 2006–2007 | 4549                  | 0                                 | 5                          | 141948              |
| Burkina Faso | 2003           | Burkina Faso Core Welfare Indicators Questionnaire Survey 2003                | 7797                  | 0                                 | 232                        | 1855 <sup>†</sup>   |
| Burkina Faso | 2003           | Burkina Faso Demographic and Health Survey 2003                               | 8808                  | 397                               | 0                          | 19088               |
| Burkina Faso | 2006           | Burkina Faso Multiple Indicator Cluster Survey 2006                           | 5101                  | 195                               | 0                          | 1927                |
| Burkina Faso | 2007           | Burkina Faso Core Welfare Indicators Questionnaire Survey 2007                | 4417                  | 0                                 | 13                         | 18499 <sup>†</sup>  |
| Burkina Faso | 2010–2011      | Burkina Faso Demographic and Health Survey 2010–2011                          | 6381                  | 540                               | 0                          | 19133               |
| Burkina Faso | 2014           | Burkina Faso Continuous Multisectoral Survey 2014                             | 11007                 | 0                                 | 13                         | 236156              |
| Burundi      | 2000           | Burundi Multiple Indicator Cluster Survey 2000                                | 2689                  | 0                                 | 17                         | 1994                |
| Burundi      | 2010–2011      | Burundi Demographic and Health Survey 2010–2011                               | 3520                  | 376                               | 0                          | 30431               |
| Burundi      | 2016–2017      | Burundi Demographic and Health Survey 2016–2017                               | 6059                  | 552                               | 0                          | 286766              |
| Cambodia     | 2000           | Cambodia Demographic and Health Survey 2000                                   | 3785                  | 467                               | 0                          | 19156               |
| Cambodia     | 2003–2005      | Cambodia Socio-Economic Survey 2003–2005                                      | 2656                  | 0                                 | 14                         | 30963 <sup>†</sup>  |
| Cambodia     | 2005–2006      | Cambodia Demographic and Health Survey 2005–2006                              | 3673                  | 546                               | 0                          | 19167               |
| Cambodia     | 2006–2007      | Cambodia Socio-Economic Survey 2006–2007                                      | 1593                  | 27                                | 260                        | 31050 <sup>†</sup>  |
| Cambodia     | 2008           | Cambodia Anthropometric Survey 2008 - National Institute of Statistics        | 8580                  | 0                                 | 709                        | 135773 <sup>†</sup> |
| Cambodia     | 2009           | Cambodia Socio-Economic Survey 2009                                           | 5456                  | 0                                 | 517                        | 31143 <sup>†</sup>  |

| Country                  | Survey year(s) | Survey Name                                                          | Number of Individuals | Number of geo-positioned clusters | Number of polygons (areal) | GHDx NID            |
|--------------------------|----------------|----------------------------------------------------------------------|-----------------------|-----------------------------------|----------------------------|---------------------|
| Cambodia                 | 2010–2011      | Cambodia Demographic and Health Survey 2010–2011                     | 3816                  | 604                               | 0                          | 30379               |
| Cambodia                 | 2014           | Cambodia Demographic and Health Survey 2014                          | 4466                  | 608                               | 0                          | 157024              |
| Cameroon                 | 2004           | Cameroon Demographic and Health Survey 2004                          | 3352                  | 446                               | 0                          | 19211               |
| Cameroon                 | 2006           | Cameroon Multiple Indicator Cluster Survey 2006                      | 6178                  | 0                                 | 191                        | 2063                |
| Cameroon                 | 2011           | Cameroon Demographic and Health Survey 2011                          | 5211                  | 574                               | 0                          | 19274               |
| Cameroon                 | 2014           | Cameroon Multiple Indicator Cluster Survey 2014                      | 6758                  | 0                                 | 206                        | 244455              |
| Central African Republic | 2000           | Central African Republic Multiple Indicator Cluster Survey 2000      | 13722                 | 0                                 | 17                         | 2209                |
| Central African Republic | 2006           | Central African Republic Multiple Indicator Cluster Survey 2006      | 9240                  | 0                                 | 16                         | 2223                |
| Central African Republic | 2010–2011      | Central African Republic Multiple Indicator Cluster Survey 2010–2011 | 10344                 | 0                                 | 17                         | 82832               |
| Chad                     | 2000           | Chad Multiple Indicator Cluster Survey 2000                          | 5314                  | 0                                 | 15                         | 2244                |
| Chad                     | 2004           | Chad Demographic and Health Survey 2004                              | 4725                  | 0                                 | 9                          | 19315               |
| Chad                     | 2010           | Chad Multiple Indicator Cluster Survey 2010                          | 15641                 | 0                                 | 60                         | 76701               |
| Chad                     | 2014–2015      | Chad Demographic and Health Survey 2014–2015                         | 10524                 | 623                               | 0                          | 157025              |
| China                    | 1989–2011      | China Health and Nutrition Survey 1989–2011                          | 5207                  | 0                                 | 9                          | 200838              |
| China                    | 2016           | China Family Dynamics Survey 2016                                    | 1577                  | 0                                 | 301                        | 399041 <sup>†</sup> |
| Colombia                 | 2000           | Colombia Demographic and Health Survey 2000                          | 4264                  | 0                                 | 23                         | 19359               |
| Colombia                 | 2004–2005      | Colombia Demographic and Health Survey 2004–2005                     | 12574                 | 0                                 | 33                         | 19324               |
| Colombia                 | 2009–2010      | Colombia Demographic and Health Survey 2009–2010                     | 15798                 | 4279                              | 0                          | 21281               |
| Comoros                  | 2000           | Comoros Multiple Indicator Cluster Survey 2000                       | 4623                  | 0                                 | 3                          | 3114                |
| Comoros                  | 2012–2013      | Comoros Demographic and Health Survey 2012–2013                      | 2657                  | 241                               | 0                          | 76850               |
| Côte d'Ivoire            | 2006           | Côte d'Ivoire Multiple Indicator Cluster Survey 2006                 | 8621                  | 0                                 | 52                         | 26433               |
| Côte d'Ivoire            | 2011–2012      | Côte d'Ivoire Demographic and Health Survey 2011–2012                | 3228                  | 341                               | 0                          | 18533               |

| Country                          | Survey year(s) | Survey Name                                                              | Number of Individuals | Number of geo-positioned clusters | Number of polygons (areal) | GHDx NID          |
|----------------------------------|----------------|--------------------------------------------------------------------------|-----------------------|-----------------------------------|----------------------------|-------------------|
| Côte d'Ivoire                    | 2016           | Cote d'Ivoire Multiple Indicator Cluster Survey 2016                     | 9032                  | 0                                 | 11                         | 218611            |
| Cuba                             | 2014           | Cuba Multiple Indicator Cluster Survey 2014                              | 5397                  | 0                                 | 4                          | 169975            |
| Democratic Republic of the Congo | 2001           | Democratic Republic of the Congo Multiple Indicator Cluster Survey 2001  | 10073                 | 0                                 | 11                         | 3161              |
| Democratic Republic of the Congo | 2007           | Democratic Republic of the Congo Demographic and Health Survey 2007      | 3647                  | 293                               | 0                          | 19381             |
| Democratic Republic of the Congo | 2010           | Democratic Republic of the Congo Multiple Indicator Cluster Survey 2010  | 10233                 | 357                               | 0                          | 26998             |
| Democratic Republic of the Congo | 2013           | Democratic Republic of the Congo Demographic and Health Survey 2013–2014 | 7765                  | 492                               | 0                          | 76878             |
| Djibouti                         | 2006           | Djibouti Multiple Indicator Cluster Survey 2006                          | 2193                  | 35                                | 1                          | 3404              |
| Djibouti                         | 2012           | Djibouti Family Health Survey 2012                                       | 3549                  | 0                                 | 6                          | 218035            |
| Dominican Republic               | 2000           | Dominican Republic Multiple Indicator Cluster Survey 2000                | 1918                  | 0                                 | 30                         | 27069             |
| Dominican Republic               | 2002           | Dominican Republic Demographic and Health Survey 2002                    | 9613                  | 0                                 | 32                         | 19444             |
| Dominican Republic               | 2006           | Dominican Republic National Multipurpose Household Survey 2006           | 3788                  | 0                                 | 32                         | 3455 <sup>†</sup> |
| Dominican Republic               | 2007           | Dominican Republic Demographic and Health Survey 2007                    | 9559                  | 1397                              | 0                          | 19456             |
| Dominican Republic               | 2007           | Dominican Republic Special Demographic and Health Survey 2007            | 811                   | 0                                 | 9                          | 21198             |
| Dominican Republic               | 2013           | Dominican Republic Demographic and Health Survey 2013                    | 3251                  | 513                               | 0                          | 77819             |

| Country            | Survey year(s) | Survey Name                                                                                                                     | Number of Individuals | Number of geo-positioned clusters | Number of polygons (areal) | GHDx NID            |
|--------------------|----------------|---------------------------------------------------------------------------------------------------------------------------------|-----------------------|-----------------------------------|----------------------------|---------------------|
| Dominican Republic | 2013           | Dominican Republic Special Demographic and Health Survey 2013                                                                   | 794                   | 111                               | 0                          | 165645              |
| Ecuador            | 2004           | Ecuador Reproductive Health Survey 2004                                                                                         | 5297                  | 680                               | 0                          | 27630               |
| Ecuador            | 2005–2006      | Ecuador Living Conditions Survey 2005–2006                                                                                      | 5614                  | 283                               | 88                         | 46924               |
| Ecuador            | 2012           | Ecuador National Health and Nutrition Survey 2012                                                                               | 6151                  | 0                                 | 480                        | 153674              |
| Egypt              | 2000           | Egypt Demographic and Health Survey 2000                                                                                        | 10743                 | 985                               | 0                          | 19511               |
| Egypt              | 2003           | Egypt Interim Demographic and Health Survey 2003                                                                                | 5425                  | 876                               | 0                          | 19529               |
| Egypt              | 2005           | Egypt Demographic and Health Survey 2005                                                                                        | 12639                 | 1288                              | 0                          | 19521               |
| Egypt              | 2008           | Egypt Demographic and Health Survey 2008                                                                                        | 10331                 | 1221                              | 0                          | 26842               |
| Egypt              | 2014           | Egypt Demographic and Health Survey 2014                                                                                        | 15153                 | 1736                              | 0                          | 154897              |
| Egypt              | 2013–2014      | Egypt IPHN Rural Districts Multiple Indicator Cluster Survey 2013–2014                                                          | 5090                  | 0                                 | 6                          | 159617              |
| El Salvador        | 2002–2003      | El Salvador Reproductive Health Survey 2002–2003                                                                                | 5328                  | 0                                 | 14                         | 27599               |
| El Salvador        | 2008           | El Salvador Reproductive Health Survey 2008                                                                                     | 4651                  | 0                                 | 14                         | 27606               |
| El Salvador        | 2014           | El Salvador Multiple Indicator Cluster Survey 2014                                                                              | 7288                  | 0                                 | 14                         | 200636              |
| Equatorial Guinea  | 2000           | Equatorial Guinea Multiple Indicator Cluster Survey 2000                                                                        | 2424                  | 0                                 | 7                          | 3655                |
| Eritrea            | 2002           | Eritrea Demographic and Health Survey 2002                                                                                      | 5727                  | 0                                 | 6                          | 19539 <sup>†</sup>  |
| Ethiopia           | 2017           | Spatial heterogeneity and risk factors for stunting among children under age five in Ethiopia: A Bayesian geo-statistical model | 3974                  | 3035                              | 0                          | 319322 <sup>†</sup> |
| Ethiopia           | 2000           | Ethiopia Demographic and Health Survey 2000                                                                                     | 9062                  | 533                               | 0                          | 19571               |
| Ethiopia           | 2005           | Ethiopia Demographic and Health Survey 2005                                                                                     | 4196                  | 520                               | 0                          | 19557               |
| Ethiopia           | 2010–2011      | Ethiopia Demographic and Health Survey 2010–2011                                                                                | 9639                  | 571                               | 0                          | 21301               |
| Ethiopia           | 2011–2012      | Ethiopia Rural Socioeconomic Survey 2011–2012                                                                                   | 2474                  | 332                               | 0                          | 93848               |
| Ethiopia           | 2014           | Ethiopia Mini Demographic and Health Survey 2014                                                                                | 4888                  | 0                                 | 11                         | 153507 <sup>†</sup> |
| Ethiopia           | 2013–2014      | Ethiopia Socioeconomic Survey 2013–2014                                                                                         | 2792                  | 434                               | 0                          | 235215              |
| Ethiopia           | 2016           | Ethiopia Demographic and Health Survey 2016                                                                                     | 8779                  | 619                               | 0                          | 218568              |

| Country       | Survey year(s) | Survey Name                                                | Number of Individuals | Number of geo-positioned clusters | Number of polygons (areal) | GHDx NID            |
|---------------|----------------|------------------------------------------------------------|-----------------------|-----------------------------------|----------------------------|---------------------|
| Ethiopia      | 2015–2016      | Ethiopia Socioeconomic Survey 2015–2016                    | 2749                  | 462                               | 0                          | 286657              |
| Ethiopia      | 2015–2016      | Ethiopia Welfare Monitoring Survey 2015–2016               | 10292                 | 7463                              | 2                          | 365281 <sup>†</sup> |
| Gabon         | 2000–2001      | Gabon Demographic and Health Survey 2000–2001              | 3585                  | 0                                 | 40                         | 19579               |
| Gabon         | 2012           | Gabon Demographic and Health Survey 2012                   | 3500                  | 324                               | 0                          | 76706               |
| Ghana         | 2003           | Ghana Demographic and Health Survey 2003                   | 3270                  | 407                               | 0                          | 19627               |
| Ghana         | 2003           | Ghana Core Welfare Indicators Questionnaire Survey 2003    | 24011                 | 0                                 | 110                        | 23017 <sup>†</sup>  |
| Ghana         | 2006           | Ghana Multiple Indicator Cluster Survey 2006               | 3413                  | 0                                 | 10                         | 4694                |
| Ghana         | 2008           | Ghana Demographic and Health Survey 2008                   | 2529                  | 400                               | 0                          | 21188               |
| Ghana         | 2007–2008      | Ghana District Multiple Indicator Cluster Survey 2007–2008 | 8415                  | 0                                 | 4                          | 160576 <sup>†</sup> |
| Ghana         | 2010–2011      | Ghana - Accra Multiple Indicator Cluster Survey 2010–2011  | 439                   | 5                                 | 0                          | 56241               |
| Ghana         | 2011           | Ghana Multiple Indicator Cluster Survey 2011               | 6902                  | 738                               | 0                          | 63993               |
| Ghana         | 2014           | Ghana Demographic and Health Survey 2014                   | 2721                  | 414                               | 0                          | 157027              |
| Guatemala     | 2000           | Guatemala Living Standards Measurement Survey 2000         | 5708                  | 0                                 | 8                          | 45718               |
| Guatemala     | 2002           | Guatemala Reproductive Health Survey 2002                  | 6538                  | 370                               | 373                        | 27563               |
| Guatemala     | 2008–2009      | Guatemala Reproductive Health Survey 2008–2009             | 8299                  | 0                                 | 22                         | 4779                |
| Guatemala     | 2014–2015      | Guatemala Demographic and Health Survey 2014–2015          | 11761                 | 851                               | 0                          | 157031              |
| Guinea        | 2005           | Guinea Demographic and Health Survey 2005                  | 2718                  | 290                               | 0                          | 19683               |
| Guinea        | 2012           | Guinea Demographic and Health Survey 2012                  | 3232                  | 300                               | 0                          | 69761               |
| Guinea        | 2016           | Guinea Multiple Indicator Cluster Survey 2016              | 6756                  | 0                                 | 8                          | 303458              |
| Guinea-Bissau | 2000           | Guinea-Bissau Multiple Indicator Cluster Survey 2000       | 5728                  | 0                                 | 9                          | 4808                |
| Guinea-Bissau | 2006           | Guinea-Bissau Multiple Indicator Cluster Survey 2006       | 5670                  | 0                                 | 9                          | 4818                |
| Guinea-Bissau | 2014           | Guinea-Bissau Multiple Indicator Cluster Survey 2014       | 7579                  | 0                                 | 9                          | 174049              |
| Guyana        | 2000           | Guyana Multiple Indicator Cluster Survey 2000              | 2581                  | 0                                 | 10                         | 4916                |
| Guyana        | 2006–2007      | Guyana Multiple Indicator Cluster Survey 2006–2007         | 2381                  | 0                                 | 10                         | 4926                |
| Guyana        | 2009           | Guyana Demographic and Health Survey 2009                  | 1676                  | 307                               | 0                          | 21348               |
| Guyana        | 2014           | Guyana Multiple Indicator Cluster Survey 2014              | 3110                  | 250                               | 0                          | 200598              |
| Haiti         | 2000           | Haiti Demographic and Health Survey 2000                   | 5660                  | 317                               | 0                          | 19708               |

| Country   | Survey year(s) | Survey Name                                                              | Number of Individuals | Number of geo-positioned clusters | Number of polygons (areal) | GHDx NID            |
|-----------|----------------|--------------------------------------------------------------------------|-----------------------|-----------------------------------|----------------------------|---------------------|
| Haiti     | 2005–2006      | Haiti Demographic and Health Survey 2005–2006                            | 2529                  | 331                               | 0                          | 19720               |
| Haiti     | 2012           | Haiti Demographic and Health Survey 2012                                 | 4002                  | 435                               | 0                          | 65118               |
| Haiti     | 2016–2017      | Haiti Demographic and Health Survey 2016–2017                            | 5654                  | 449                               | 10                         | 218574              |
| Honduras  | 2001           | Honduras Reproductive Health Survey 2001                                 | 5690                  | 0                                 | 16                         | 27551               |
| Honduras  | 2004           | Honduras Survey of Living Conditions 2004                                | 4834                  | 0                                 | 18                         | 5009 <sup>†</sup>   |
| Honduras  | 2005–2006      | Honduras Demographic and Health Survey 2005–2006                         | 9427                  | 0                                 | 16                         | 19728               |
| Honduras  | 2011–2012      | Honduras Demographic and Health Survey 2011–2012                         | 9920                  | 1119                              | 0                          | 95440               |
| India     | 1998–2000      | India Demographic and Health Survey 1998–1999                            | 27937                 | 0                                 | 438                        | 19950 <sup>†</sup>  |
| India     | 2000–2001      | India Rural Survey of Diet and Nutritional Status 2000–2001              | 9262                  | 0                                 | 9                          | 129913 <sup>†</sup> |
| India     | 2004–2005      | India Human Development Survey 2004–2005                                 | 14265                 | 0                                 | 363                        | 26919               |
| India     | 2005–2006      | India Demographic and Health Survey 2005–2006                            | 44061                 | 0                                 | 29                         | 19963               |
| India     | 2004–2006      | India Rural Survey of Diet and Nutritional Status 2004–2006              | 6670                  | 0                                 | 9                          | 129905 <sup>†</sup> |
| India     | 2007–2011      | India - Kolkata Global Enteric Multicenter Study 2007–2011               | 2014                  | 1                                 | 0                          | 224240 <sup>†</sup> |
| India     | 2011–2012      | India Rural Third Repeat Survey of Diet and Nutritional Status 2011–2012 | 10300                 | 1125                              | 3                          | 129770 <sup>†</sup> |
| India     | 2011–2013      | India - Kolkata Global Enteric Multicenter Study 2011–2013               | 1172                  | 1                                 | 0                          | 224854 <sup>†</sup> |
| India     | 2012–2014      | India District Level Household Survey 2012–2014                          | 73542                 | 0                                 | 271                        | 165390              |
| India     | 2014           | India Clinical, Anthropometric and Bio-chemical Survey 2014              | 108693                | 0                                 | 277                        | 233917              |
| India     | 2015–2016      | India Demographic and Health Survey 2015–2016                            | 237528                | 28118                             | 0                          | 157050              |
| India     | 2015–2016      | India Urban Nutrition Survey 2015–2016                                   | 12027                 | 564                               | 0                          | 334953 <sup>†</sup> |
| Indonesia | 2000           | Indonesia Family Life Survey 2000                                        | 3984                  | 0                                 | 16                         | 6111                |
| Indonesia | 2007           | Indonesia Family Life Survey 2007–2008                                   | 4776                  | 0                                 | 15                         | 6464                |
| Indonesia | 2012           | Indonesia Family Life Survey East 2012                                   | 1288                  | 0                                 | 7                          | 219201              |
| Indonesia | 2014–2015      | Indonesia Family Life Survey 2014–2015                                   | 5354                  | 0                                 | 1149                       | 264956              |
| Iran      | 2004           | Iran Anthropometric Nutritional Indicators Survey 2004                   | 29434                 | 0                                 | 265                        | 159873 <sup>†</sup> |
| Iraq      | 2000           | Iraq Multiple Indicator Cluster Survey 2000                              | 14378                 | 0                                 | 18                         | 7054                |
| Iraq      | 2004           | Iraq Multiple Indicator Rapid Assessment 2004                            | 17585                 | 2027                              | 0                          | 23565 <sup>†</sup>  |

| Country    | Survey year(s) | Survey Name                                                           | Number of Individuals | Number of geo-positioned clusters | Number of polygons (areal) | GHDx NID            |
|------------|----------------|-----------------------------------------------------------------------|-----------------------|-----------------------------------|----------------------------|---------------------|
| Iraq       | 2006           | Iraq Multiple Indicator Cluster Survey 2006                           | 16473                 | 0                                 | 18                         | 7028                |
| Iraq       | 2011           | Iraq Multiple Indicator Cluster Survey 2011                           | 35847                 | 0                                 | 48                         | 76707               |
| Iraq       | 2012–2013      | Iraq Household Socioeconomic Survey 2012–2013                         | 25777                 | 14018                             | 18                         | 235348              |
| Iraq       | 2018           | Iraq Multiple Indicator Cluster Survey 2018                           | 16582                 | 0                                 | 18                         | 385708              |
| Jamaica    | 2000           | Jamaica Survey of Living Conditions 2000                              | 562                   | 0                                 | 14                         | 45856 <sup>†</sup>  |
| Jamaica    | 2001           | Jamaica Survey of Living Conditions 2001                              | 452                   | 0                                 | 14                         | 7222 <sup>†</sup>   |
| Jamaica    | 2002           | Jamaica Survey of Living Conditions 2002                              | 1901                  | 0                                 | 14                         | 80626 <sup>†</sup>  |
| Jamaica    | 2004           | Jamaica Survey of Living Conditions 2004                              | 571                   | 0                                 | 14                         | 141572 <sup>†</sup> |
| Jordan     | 2002           | Jordan Demographic and Health Survey 2002                             | 5014                  | 492                               | 0                          | 20073               |
| Jordan     | 2007           | Jordan Demographic and Health Survey 2007                             | 4803                  | 462                               | 0                          | 20083               |
| Jordan     | 2009           | Jordan Interim Demographic and Health Survey 2009                     | 4470                  | 0                                 | 12                         | 21206               |
| Jordan     | 2012           | Jordan Demographic and Health Survey 2012                             | 6410                  | 798                               | 0                          | 77517               |
| Kenya      | 2000           | Kenya Multiple Indicator Cluster Survey 2000                          | 6709                  | 802                               | 0                          | 7387                |
| Kenya      | 2003           | Kenya Demographic and Health Survey 2003                              | 4957                  | 397                               | 0                          | 20145               |
| Kenya      | 2005–2006      | Kenya Integrated Household Budget Survey 2005–2006                    | 7096                  | 1284                              | 0                          | 7375 <sup>†</sup>   |
| Kenya      | 2007           | Kenya - North Eastern Province Multiple Indicator Cluster Survey 2007 | 920                   | 76                                | 0                          | 155335              |
| Kenya      | 2008           | Kenya - Eastern Province Multiple Indicator Cluster Survey 2008       | 12300                 | 590                               | 0                          | 7401                |
| Kenya      | 2008–2009      | Kenya Demographic and Health Survey 2008–2009                         | 5373                  | 397                               | 0                          | 21365               |
| Kenya      | 2009           | Kenya - Coast Multiple Indicator Cluster Survey 2009                  | 446                   | 0                                 | 1                          | 56420               |
| Kenya      | 2011           | Kenya - Nyanza Province Multiple Indicator Cluster Survey 2011        | 4844                  | 289                               | 0                          | 135416              |
| Kenya      | 2014           | Kenya Demographic and Health Survey 2014                              | 18967                 | 1583                              | 0                          | 157057              |
| Kenya      | 2013–2014      | Kenya - Bungoma County Multiple Indicator Survey 2013–2014            | 812                   | 40                                | 0                          | 203654 <sup>†</sup> |
| Kenya      | 2013–2014      | Kenya - Kakamega County Multiple Indicator Survey 2013–2014           | 738                   | 48                                | 0                          | 203663 <sup>†</sup> |
| Kenya      | 2013–2014      | Kenya - Turkana County Multiple Indicator Survey 2013–2014            | 1032                  | 50                                | 0                          | 203664 <sup>†</sup> |
| Kyrgyzstan | 2005–2006      | Kyrgyzstan Multiple Indicator Cluster Survey 2005–2006                | 2855                  | 185                               | 2                          | 7540                |
| Kyrgyzstan | 2012           | Kyrgyzstan Demographic and Health Survey 2012                         | 4067                  | 313                               | 0                          | 77518               |

| Country    | Survey year(s) | Survey Name                                                           | Number of Individuals | Number of geo-positioned clusters | Number of polygons (areal) | GHDx NID |
|------------|----------------|-----------------------------------------------------------------------|-----------------------|-----------------------------------|----------------------------|----------|
| Kyrgyzstan | 2014           | Kyrgyzstan Multiple Indicator Cluster Survey 2014                     | 4364                  | 243                               | 2                          | 162283   |
| Kyrgyzstan | 2018           | Kyrgyzstan Multiple Indicator Cluster Survey 2018                     | 3480                  | 0                                 | 5                          | 408226   |
| Laos       | 2000           | Laos Multiple Indicator Cluster Survey 2000                           | 1554                  | 86                                | 0                          | 7618     |
| Laos       | 2006           | Laos Multiple Indicator Cluster Survey 2006                           | 4050                  | 300                               | 0                          | 7629     |
| Laos       | 2011–2012      | Laos Multiple Indicator Cluster Survey 2011–2012                      | 10887                 | 0                                 | 17                         | 103973   |
| Laos       | 2017           | Laos Multiple Indicator Cluster Survey 2017                           | 11603                 | 0                                 | 18                         | 375362   |
| Lesotho    | 2004–2005      | Lesotho Demographic and Health Survey 2004–2005                       | 1399                  | 353                               | 0                          | 20167    |
| Lesotho    | 2009–2010      | Lesotho Demographic and Health Survey 2009–2010                       | 1664                  | 383                               | 0                          | 21382    |
| Lesotho    | 2014           | Lesotho Demographic and Health Survey 2014                            | 1360                  | 369                               | 0                          | 157058   |
| Liberia    | 2006–2007      | Liberia Demographic and Health Survey 2006–2007                       | 4550                  | 290                               | 0                          | 20191    |
| Liberia    | 2013           | Liberia Demographic and Health Survey 2013                            | 3290                  | 322                               | 0                          | 77385    |
| Madagascar | 2003–2004      | Madagascar Demographic and Health Survey 2003–2004                    | 4765                  | 0                                 | 6                          | 20223    |
| Malawi     | 2000           | Malawi Demographic and Health Survey 2000                             | 9883                  | 559                               | 0                          | 20252    |
| Malawi     | 2004–2005      | Malawi Demographic and Health Survey 2004–2005                        | 8971                  | 520                               | 0                          | 20263    |
| Malawi     | 2004–2005      | Malawi Living Standards Measurement Survey 2004–2005                  | 6801                  | 0                                 | 26                         | 46317    |
| Malawi     | 2006           | Malawi Multiple Indicator Cluster Survey 2006                         | 22573                 | 0                                 | 26                         | 7919     |
| Malawi     | 2010           | Malawi Demographic and Health Survey 2010                             | 4838                  | 813                               | 0                          | 21393    |
| Malawi     | 2010–2011      | Malawi Integrated Household Survey 2010–2011                          | 7750                  | 768                               | 0                          | 93806    |
| Malawi     | 2010–2011      | Malawi Integrated Household Panel Survey, Short-Term Panel, 2010–2013 | 4683                  | 549                               | 0                          | 336401   |
| Malawi     | 2013           | Malawi Integrated Household Survey 2013                               | 2503                  | 547                               | 0                          | 224223 † |
| Malawi     | 2013           | Malawi Integrated Household Panel Survey, Short-Term Panel, 2010–2013 | 4683                  | 549                               | 0                          | 336401   |
| Malawi     | 2013–2014      | Malawi Multiple Indicator Cluster Survey 2013–2014                    | 18673                 | 0                                 | 31                         | 161662   |
| Malawi     | 2015–2016      | Malawi Demographic and Health Survey 2015–2016                        | 5284                  | 850                               | 0                          | 218581   |
| Malawi     | 2016–2017      | Malawi Integrated Household Survey 2016–2017                          | 6306                  | 0                                 | 32                         | 327852   |

| Country    | Survey year(s) | Survey Name                                                          | Number of Individuals | Number of geo-positioned clusters | Number of polygons (areal) | GHDx NID |
|------------|----------------|----------------------------------------------------------------------|-----------------------|-----------------------------------|----------------------------|----------|
| Malawi     | 2016–2017      | Malawi Integrated Household Panel Survey, Long-Term Panel, 2010–2016 | 1396                  | 0                                 | 28                         | 327857   |
| Mali       | 2001           | Mali Demographic and Health Survey 2001                              | 10043                 | 399                               | 0                          | 20315    |
| Mali       | 2006           | Mali Demographic and Health Survey 2006                              | 11677                 | 405                               | 0                          | 20274    |
| Mali       | 2009–2010      | Mali Multiple Indicator Cluster Survey 2009–2010                     | 23082                 | 0                                 | 50                         | 270627   |
| Mali       | 2012–2013      | Mali Demographic and Health Survey 2012–2013                         | 4660                  | 412                               | 0                          | 77388    |
| Mali       | 2015           | Mali Multiple Indicator Cluster Survey 2015                          | 15881                 | 0                                 | 8                          | 248224   |
| Mauritania | 2000–2001      | Mauritania Demographic and Health Survey 2000–2001                   | 4042                  | 0                                 | 13                         | 20322    |
| Mauritania | 2007           | Mauritania Multiple Indicator Cluster Survey 2007                    | 8283                  | 0                                 | 196                        | 8115     |
| Mauritania | 2011           | Mauritania Multiple Indicator Cluster Survey 2011                    | 8977                  | 0                                 | 194                        | 152783   |
| Mauritania | 2015           | Mauritania Multiple Indicator Cluster Survey 2015                    | 10285                 | 0                                 | 13                         | 267343   |
| Mexico     | 2005–2006      | Mexico National Survey of Health and Nutrition 2005–2006             | 8454                  | 0                                 | 576                        | 8618     |
| Mexico     | 2011–2012      | Mexico National Survey of Health and Nutrition 2011–2012             | 8951                  | 0                                 | 2                          | 81748    |
| Mexico     | 2008–2013      | Mexico Family Life Survey 2008–2013                                  | 3312                  | 0                                 | 197                        | 160781   |
| Mexico     | 2016           | Mexico National Survey of Health and Nutrition Mid-way 2016          | 2082                  | 440                               | 0                          | 316736   |
| Mongolia   | 2000           | Mongolia Multiple Indicator Cluster Survey 2000                      | 5958                  | 0                                 | 17                         | 8788     |
| Mongolia   | 2005           | Mongolia Multiple Indicator Cluster Survey 2005                      | 3377                  | 0                                 | 22                         | 8777     |
| Mongolia   | 2012           | Mongolia - Khövsgöl Multiple Indicator Cluster Survey 2012           | 745                   | 0                                 | 23                         | 189045   |
| Mongolia   | 2012           | Mongolia - Nalaikh District Multiple Cluster Indicator Survey 2012   | 427                   | 0                                 | 1                          | 189048   |
| Mongolia   | 2013           | Mongolia Multiple Indicator Cluster Survey 2013                      | 5771                  | 0                                 | 527                        | 150866   |
| Mongolia   | 2016           | Mongolia - Khövsgöl Multiple Indicator Cluster Survey 2016           | 1084                  | 0                                 | 82                         | 335994   |
| Mongolia   | 2016           | Mongolia - Nalaikh District Multiple Indicator Cluster Survey 2016   | 368                   | 0                                 | 7                          | 336042†  |
| Morocco    | 2003–2004      | Morocco Demographic and Health Survey 2003–2004                      | 5711                  | 479                               | 0                          | 20361    |
| Morocco    | 2010–2011      | Morocco National Survey on Population and Family Health 2010–2011    | 6420                  | 0                                 | 59                         | 126909†  |
| Mozambique | 2003           | Mozambique Demographic and Health Survey 2003–2004                   | 8367                  | 0                                 | 11                         | 20394    |
| Mozambique | 2008–2009      | Mozambique Multiple Indicator Cluster Survey 2008–2009               | 10948                 | 67                                | 618                        | 27031    |

| Country    | Survey year(s) | Survey Name                                                | Number of Individuals | Number of geo-positioned clusters | Number of polygons (areal) | GHDx NID            |
|------------|----------------|------------------------------------------------------------|-----------------------|-----------------------------------|----------------------------|---------------------|
| Mozambique | 2011           | Mozambique Demographic and Health Survey 2011              | 9753                  | 609                               | 0                          | 55975               |
| Myanmar    | 2000           | Myanmar Multiple Indicator Cluster Survey 2000             | 8592                  | 0                                 | 16                         | 8932                |
| Myanmar    | 2003           | Myanmar Multiple Indicator Cluster Survey 2003             | 5991                  | 0                                 | 17                         | 141910 <sup>†</sup> |
| Myanmar    | 2009–2010      | Myanmar Multiple Indicator Cluster Survey 2009–2010        | 15545                 | 0                                 | 17                         | 90696 <sup>†</sup>  |
| Myanmar    | 2015–2016      | Myanmar Demographic and Health Survey 2015–2016            | 4320                  | 439                               | 0                          | 157061              |
| Namibia    | 2000           | Namibia Demographic and Health Survey 2000                 | 3075                  | 256                               | 0                          | 20417               |
| Namibia    | 2006–2007      | Namibia Demographic and Health Survey 2006–2007            | 3809                  | 484                               | 0                          | 20428               |
| Namibia    | 2009–2010      | Namibia Household Income and Expenditure Survey 2009–2010  | 5696                  | 0                                 | 13                         | 134371              |
| Namibia    | 2013           | Namibia Demographic and Health Survey 2013                 | 1882                  | 504                               | 0                          | 150382              |
| Nepal      | 2001           | Nepal Demographic and Health Survey 2001                   | 6295                  | 248                               | 0                          | 20450               |
| Nepal      | 2006           | Nepal Demographic and Health Survey 2006                   | 5319                  | 260                               | 0                          | 20462               |
| Nepal      | 2011           | Nepal Demographic and Health Survey 2011                   | 2365                  | 288                               | 0                          | 21240               |
| Nepal      | 2014           | Nepal Multiple Indicator Cluster Survey 2014               | 5170                  | 508                               | 0                          | 162317              |
| Nepal      | 2016           | Nepal Household Risk and Vulnerability Survey 2016, Wave 1 | 1826                  | 0                                 | 50                         | 400219              |
| Nepal      | 2016–2017      | Nepal Demographic and Health Survey 2016–2017              | 2382                  | 375                               | 73                         | 286782              |
| Nicaragua  | 2001           | Nicaragua Living Standards Measurement Survey 2001         | 2538                  | 0                                 | 117                        | 9422                |
| Nicaragua  | 2001           | Nicaragua Demographic and Health Survey 2001               | 6219                  | 0                                 | 133                        | 20487               |
| Nicaragua  | 2005           | Nicaragua Living Standards Measurement Survey 2005         | 3583                  | 0                                 | 134                        | 44645               |
| Nicaragua  | 2006–2007      | Nicaragua Reproductive Health Survey 2006–2007             | 6286                  | 0                                 | 141                        | 9270                |
| Niger      | 2000           | Niger Multiple Indicator Cluster Survey 2000               | 4929                  | 0                                 | 8                          | 9439                |
| Niger      | 2006           | Niger Demographic and Health Survey 2006                   | 3901                  | 0                                 | 8                          | 20499               |
| Niger      | 2012           | Niger Demographic and Health Survey 2012                   | 5208                  | 0                                 | 8                          | 74393               |
| Nigeria    | 2003           | Nigeria Demographic and Health Survey 2003                 | 4813                  | 359                               | 0                          | 20567               |
| Nigeria    | 2008           | Nigeria Demographic and Health Survey 2008                 | 23492                 | 886                               | 0                          | 21433               |
| Nigeria    | 2011           | Nigeria Multiple Indicator Cluster Survey 2011             | 24478                 | 0                                 | 37                         | 76703               |
| Nigeria    | 2013           | Nigeria Demographic and Health Survey 2013                 | 26945                 | 888                               | 0                          | 77390               |
| Nigeria    | 2012–2013      | Nigeria General Household Survey 2012–2013                 | 2801                  | 487                               | 0                          | 151797              |

| Country   | Survey year(s) | Survey Name                                                                                               | Number of Individuals | Number of geo-positioned clusters | Number of polygons (areal) | GHDx NID            |
|-----------|----------------|-----------------------------------------------------------------------------------------------------------|-----------------------|-----------------------------------|----------------------------|---------------------|
| Nigeria   | 2015–2016      | Nigeria General Household Survey 2015–2016                                                                | 2898                  | 512                               | 0                          | 274160              |
| Nigeria   | 2016–2017      | Nigeria Multiple Indicator Cluster Survey with National Immunization Coverage Survey Supplement 2016–2017 | 26948                 | 2136                              | 0                          | 218613              |
| Pakistan  | 2011           | Pakistan National Nutrition Survey 2011                                                                   | 28603                 | 1001                              | 0                          | 141521 <sup>†</sup> |
| Pakistan  | 2012–2013      | Pakistan Demographic and Health Survey 2012–2013                                                          | 3712                  | 0                                 | 6                          | 77521               |
| Pakistan  | 2014           | Pakistan - Sindh Multiple Indicator Cluster Survey 2014                                                   | 16086                 | 0                                 | 28                         | 232763              |
| Pakistan  | 2014           | Pakistan - Punjab Multiple Indicator Cluster Survey 2014                                                  | 26900                 | 0                                 | 36                         | 236266              |
| Pakistan  | 2017–2018      | Pakistan Demographic and Health Survey 2017–2018                                                          | 4271                  | 553                               | 0                          | 286783              |
| Palestine | 2000           | Palestine - West Bank and Gaza Strip Multiple Indicator Cluster Survey 2000                               | 6029                  | 0                                 | 2                          | 10001 <sup>†</sup>  |
| Palestine | 2002           | Palestine Nutrition Survey 2002                                                                           | 3347                  | 0                                 | 2                          | 9989 <sup>†</sup>   |
| Palestine | 2004           | Palestine Demographic and Health Survey 2004                                                              | 4691                  | 0                                 | 2                          | 20596 <sup>†</sup>  |
| Palestine | 2006–2007      | Palestine Family Health Survey 2006–2007                                                                  | 9480                  | 0                                 | 16                         | 9999 <sup>†</sup>   |
| Palestine | 2010           | Palestine Multiple Indicator Cluster Survey 2010                                                          | 9408                  | 0                                 | 16                         | 125591              |
| Palestine | 2014           | Palestine Multiple Indicator Cluster Survey 2014                                                          | 7256                  | 0                                 | 16                         | 161590              |
| Panama    | 2003           | Panama Living Standard Measurement Survey 2003                                                            | 2931                  | 0                                 | 12                         | 10224               |
| Panama    | 2008           | Panama Living Standard Measurement Survey 2008                                                            | 2519                  | 0                                 | 12                         | 46517               |
| Paraguay  | 2016           | Paraguay Multiple Indicator Cluster Survey 2016                                                           | 4463                  | 0                                 | 9                          | 324470              |
| Peru      | 2000           | Peru National Living Standards Measurement Survey 2000                                                    | 1854                  | 0                                 | 225                        | 10460               |
| Peru      | 2000           | Peru Demographic and Health Survey 2000                                                                   | 11897                 | 1383                              | 0                          | 20649               |
| Peru      | 2003–2008      | Peru Continuous Demographic and Health Survey 2003–2008                                                   | 7022                  | 825                               | 0                          | 275090              |
| Peru      | 2007–2008      | Peru Monitoring of Nutritional Indicators in the National Household Survey 2007–2008                      | 4175                  | 0                                 | 604                        | 359163 <sup>†</sup> |
| Peru      | 2009           | Peru Continuous Demographic and Health Survey 2009                                                        | 9468                  | 1121                              | 0                          | 270404              |
| Peru      | 2010           | Peru Continuous Demographic and Health Survey 2010                                                        | 8854                  | 0                                 | 24                         | 270469              |
| Peru      | 2009–2010      | Peru Monitoring of Nutritional Indicators in the National Household Survey 2009–2011                      | 6062                  | 0                                 | 833                        | 359146 <sup>†</sup> |

| Country               | Survey year(s) | Survey Name                                                                               | Number of Individuals | Number of geo-positioned clusters | Number of polygons (areal) | GHDx NID |
|-----------------------|----------------|-------------------------------------------------------------------------------------------|-----------------------|-----------------------------------|----------------------------|----------|
| Peru                  | 2011           | Peru Continuous Demographic and Health Survey 2011                                        | 8806                  | 0                                 | 24                         | 270470   |
| Peru                  | 2012           | Peru Continuous Demographic and Health Survey 2012                                        | 9266                  | 0                                 | 24                         | 270471   |
| Peru                  | 2013           | Peru Continuous Demographic and Health Survey 2013                                        | 9345                  | 0                                 | 24                         | 146860   |
| Peru                  | 2014           | Peru Continuous Demographic and Health Survey 2014                                        | 9932                  | 0                                 | 24                         | 209930   |
| Peru                  | 2015           | Peru Demographic and Family Health Survey 2015                                            | 23242                 | 1614                              | 0                          | 303663   |
| Peru                  | 2016           | Peru Demographic and Family Health Survey 2016                                            | 20606                 | 1916                              | 0                          | 303664   |
| Peru                  | 2017           | Peru Demographic and Family Health Survey 2017                                            | 22334                 | 1878                              | 0                          | 358824   |
| Peru                  | 2018           | Peru Demographic and Family Health Survey 2018                                            | 23992                 | 3815                              | 0                          | 407869   |
| Republic of the Congo | 2005           | Congo Demographic and Health Survey 2005                                                  | 4118                  | 0                                 | 12                         | 19391    |
| Republic of the Congo | 2011–2012      | Congo Demographic and Health Survey 2011–2012                                             | 4549                  | 0                                 | 12                         | 56151    |
| Republic of the Congo | 2014–2015      | Congo Multiple Indicator Cluster Survey 2014–2015                                         | 8893                  | 0                                 | 11                         | 234733   |
| Rwanda                | 2000           | Rwanda Demographic and Health Survey 2000                                                 | 6429                  | 0                                 | 12                         | 20722    |
| Rwanda                | 2000           | Rwanda Multiple Indicator Cluster Survey 2000                                             | 2848                  | 0                                 | 12                         | 26930    |
| Rwanda                | 2001           | Rwanda Integrated Household Living Conditions Survey 1999–2001                            | 4075                  | 0                                 | 12                         | 11319    |
| Rwanda                | 2005           | Rwanda Demographic and Health Survey 2005                                                 | 3775                  | 455                               | 0                          | 20740    |
| Rwanda                | 2006           | Rwanda Comprehensive Food Security and Vulnerability Assessment 2006                      | 1869                  | 0                                 | 281                        | 58185    |
| Rwanda                | 2010–2011      | Rwanda Demographic and Health Survey 2010–2011                                            | 4145                  | 492                               | 0                          | 56040    |
| Rwanda                | 2012           | Rwanda Comprehensive Food Security and Vulnerability Assessment and Nutrition Survey 2012 | 4446                  | 0                                 | 743                        | 151436   |
| Rwanda                | 2014–2015      | Rwanda Demographic and Health Survey 2014–2015                                            | 3617                  | 491                               | 0                          | 157063   |
| Sao Tome and Principe | 2000           | Sao Tome and Principe Multiple Indicator Cluster Survey 2000                              | 1842                  | 0                                 | 4                          | 27055    |

| Country               | Survey year(s) | Survey Name                                                       | Number of Individuals | Number of geo-positioned clusters | Number of polygons (areal) | GHDx NID |
|-----------------------|----------------|-------------------------------------------------------------------|-----------------------|-----------------------------------|----------------------------|----------|
| Sao Tome and Principe | 2008–2009      | Sao Tome and Principe Demographic and Health Survey 2008–2009     | 1719                  | 0                                 | 7                          | 26866    |
| Sao Tome and Principe | 2014           | Sao Tome and Principe Multiple Indicator Cluster Survey 2014      | 1965                  | 0                                 | 7                          | 214640   |
| Senegal               | 2000           | Senegal Multiple Indicator Cluster Survey 2000                    | 8703                  | 0                                 | 10                         | 27044    |
| Senegal               | 2005           | Senegal Demographic and Health Survey 2005                        | 2867                  | 360                               | 0                          | 26855    |
| Senegal               | 2010–2011      | Senegal Demographic and Health Survey 2010–2011                   | 3872                  | 385                               | 0                          | 56063    |
| Senegal               | 2012–2013      | Senegal Continuous Demographic and Health Survey 2012–2013        | 6100                  | 200                               | 0                          | 111432   |
| Senegal               | 2014           | Senegal Continuous Demographic and Health Survey 2014             | 6025                  | 196                               | 0                          | 191270   |
| Senegal               | 2015           | Senegal Continuous Demographic and Health Survey 2015             | 6257                  | 214                               | 0                          | 218592   |
| Senegal               | 2016           | Senegal Continuous Demographic and Health Survey 2016             | 6085                  | 214                               | 0                          | 286772   |
| Senegal               | 2015–2016      | Senegal - Dakar Urban Multiple Indicator Cluster Survey 2015–2016 | 4234                  | 0                                 | 4                          | 287639   |
| Senegal               | 2017           | Senegal Continuous Demographic and Health Survey 2017             | 10841                 | 0                                 | 14                         | 353526   |
| Sierra Leone          | 2000           | Sierra Leone Multiple Indicator Cluster Survey 2000               | 2480                  | 0                                 | 4                          | 11639    |
| Sierra Leone          | 2005           | Sierra Leone Multiple Indicator Cluster Survey 2005               | 5229                  | 0                                 | 14                         | 11649    |
| Sierra Leone          | 2008           | Sierra Leone Demographic and Health Survey 2008                   | 2289                  | 340                               | 0                          | 21258    |
| Sierra Leone          | 2010           | Sierra Leone Multiple Indicator Cluster Survey 2010               | 8422                  | 0                                 | 14                         | 76700    |
| Sierra Leone          | 2013           | Sierra Leone Demographic and Health Survey 2013                   | 4806                  | 434                               | 0                          | 131467   |
| Sierra Leone          | 2017           | Sierra Leone Multiple Indicator Cluster Survey 2017               | 11785                 | 0                                 | 14                         | 218619   |
| Somalia               | 2006           | Somalia Multiple Indicator Cluster Survey 2006                    | 5867                  | 0                                 | 18                         | 11774    |
| South Africa          | 2002           | South Africa - Agincourt Integrated Family Survey 2002            | 197                   | 0                                 | 1                          | 135825   |
| South Africa          | 2004           | South Africa KwaZulu-Natal Income Dynamics Study 2004             | 794                   | 0                                 | 1                          | 31142    |
| South Africa          | 2004           | South Africa - Agincourt Integrated Family Survey 2004            | 301                   | 0                                 | 1                          | 135826   |
| South Africa          | 2008           | South Africa National Income Dynamics Study - Wave 1 2008         | 2161                  | 0                                 | 47                         | 27885    |
| South Africa          | 2010–2011      | South Africa National Income Dynamics Study - Wave 2 2010–2011    | 1700                  | 0                                 | 55                         | 133731   |

| Country      | Survey year(s) | Survey Name                                                    | Number of Individuals | Number of geo-positioned clusters | Number of polygons (areal) | GHDx NID            |
|--------------|----------------|----------------------------------------------------------------|-----------------------|-----------------------------------|----------------------------|---------------------|
| South Africa | 2012           | South Africa National Income Dynamics Study - Wave 3 2012      | 3190                  | 0                                 | 52                         | 133732              |
| South Africa | 2014–2015      | South Africa National Income Dynamics Study - Wave 4 2014–2015 | 3878                  | 0                                 | 52                         | 265153              |
| South Africa | 2016           | South Africa National Income Dynamics Study - Wave 5 2017      | 1139                  | 475                               | 0                          | 157064              |
| South Africa | 2017           | South Africa Demographic and Health Survey 2016                | 3874                  | 0                                 | 52                         | 369644              |
| South Sudan  | 2000           | Sudan - South Multiple Indicator Cluster Survey 1999           | 1130                  | 0                                 | 45                         | 12232               |
| South Sudan  | 2010           | Sudan - South Multiple Indicator Cluster Survey 2010           | 6807                  | 0                                 | 10                         | 32189               |
| Sri Lanka    | 1999–2000      | Sri Lanka Integrated Survey 1999–2000                          | 2037                  | 455                               | 0                          | 12201               |
| Sudan        | 2000           | Sudan Multiple Indicator Cluster Survey 2000                   | 20561                 | 0                                 | 16                         | 12243               |
| Sudan        | 2010           | Sudan - North Multiple Indicator Cluster Survey 2010           | 12296                 | 0                                 | 15                         | 153643              |
| Sudan        | 2014           | Sudan Multiple Indicator Cluster Survey 2014                   | 12999                 | 0                                 | 18                         | 200617              |
| Suriname     | 1999–2000      | Suriname Multiple Indicator Cluster Survey 1999–2000           | 1811                  | 0                                 | 10                         | 12280               |
| Suriname     | 2006           | Suriname Multiple Indicator Cluster Survey 2006                | 2017                  | 0                                 | 5                          | 12289               |
| Suriname     | 2010           | Suriname Multiple Indicator Cluster Survey 2010                | 2859                  | 0                                 | 10                         | 81203               |
| Swaziland    | 2000           | Swaziland Multiple Indicator Cluster Survey 2000               | 3411                  | 0                                 | 4                          | 12320               |
| Swaziland    | 2006–2007      | Swaziland Demographic and Health Survey 2006–2007              | 2080                  | 268                               | 0                          | 20829               |
| Swaziland    | 2010           | Swaziland Multiple Indicator Cluster Survey 2010               | 2590                  | 0                                 | 4                          | 30325               |
| Swaziland    | 2014           | Swaziland Multiple Indicator Cluster Survey 2014               | 2668                  | 0                                 | 4                          | 200707              |
| Syria        | 2006           | Syria Multiple Indicator Cluster Survey 2006                   | 10784                 | 0                                 | 60                         | 12399               |
| Syria        | 2009           | Syria Family Health Survey 2009                                | 15305                 | 0                                 | 14                         | 126911 <sup>†</sup> |
| Tajikistan   | 2005           | Tajikistan Multiple Indicator Cluster Survey 2005              | 4239                  | 0                                 | 5                          | 12608               |
| Tajikistan   | 2007           | Tajikistan Living Standards Measurement Survey 2007            | 149                   | 18                                | 0                          | 12584               |
| Tajikistan   | 2012           | Tajikistan Demographic and Health Survey 2012                  | 4568                  | 341                               | 0                          | 74460               |
| Tajikistan   | 2017           | Tajikistan Demographic and Health Survey 2017                  | 5902                  | 365                               | 0                          | 341838              |
| Tanzania     | 2004           | Tanzania - Kagera Living Standards Measurement Study 2004      | 1967                  | 894                               | 0                          | 14341               |
| Tanzania     | 2004–2005      | Tanzania Demographic and Health Survey 2004–2005               | 7344                  | 0                                 | 26                         | 20875               |

| Country             | Survey year(s) | Survey Name                                                               | Number of Individuals | Number of geo-positioned clusters | Number of polygons (areal) | GHDx NID            |
|---------------------|----------------|---------------------------------------------------------------------------|-----------------------|-----------------------------------|----------------------------|---------------------|
| Tanzania            | 2006–2007      | Tanzania Core Welfare Indicators Questionnaire Survey 2006–2007           | 9989                  | 0                                 | 28                         | 31831               |
| Tanzania            | 2009–2010      | Tanzania Demographic and Health Survey 2009–2010                          | 6766                  | 458                               | 0                          | 21331               |
| Tanzania            | 2010–2011      | Tanzania National Panel Survey 2010–2011                                  | 2741                  | 0                                 | 126                        | 81005               |
| Tanzania            | 2012–2013      | Tanzania National Panel Survey 2012–2013                                  | 3364                  | 0                                 | 135                        | 224096 <sup>†</sup> |
| Tanzania            | 2015–2016      | Tanzania Demographic and Health Survey 2015–2016                          | 9104                  | 607                               | 0                          | 218593              |
| Tanzania            | 2014–2016      | Tanzania National Panel Survey 2014–2016                                  | 2463                  | 417                               | 0                          | 311265              |
| Thailand            | 2005–2006      | Thailand Multiple Indicator Cluster Survey 2005–2006                      | 9207                  | 0                                 | 4                          | 12732               |
| Thailand            | 2012           | Thailand Multiple Indicator Cluster Survey 2012                           | 9246                  | 0                                 | 5                          | 148649              |
| Thailand            | 2015–2016      | Thailand Multiple Indicator Cluster Survey 2015–2016                      | 11368                 | 0                                 | 5                          | 296646              |
| Thailand            | 2016           | Thailand - Bangkok Small Community Multiple Indicator Cluster Survey 2016 | 992                   | 0                                 | 1                          | 331377              |
| The Gambia          | 2000           | Gambia Multiple Indicator Cluster Survey 2000                             | 3465                  | 0                                 | 8                          | 3922                |
| The Gambia          | 2005–2006      | Gambia Multiple Indicator Cluster Survey 2005–2006                        | 6465                  | 0                                 | 36                         | 3935                |
| The Gambia          | 2010           | Gambia Multiple Indicator Cluster Survey 2010                             | 11574                 | 0                                 | 6                          | 91506               |
| The Gambia          | 2013           | Gambia Demographic and Health Survey 2013                                 | 3408                  | 0                                 | 37                         | 77384               |
| Timor-Leste         | 2003           | Timor-Leste Demographic and Health Survey 2003                            | 5321                  | 287                               | 92                         | 20888 <sup>†</sup>  |
| Timor-Leste         | 2007–2008      | Timor-Leste Living Standards and Measurement Survey 2007–2008             | 3531                  | 0                                 | 64                         | 46682 <sup>†</sup>  |
| Timor-Leste         | 2009–2010      | Timor-Leste Demographic and Health Survey 2009–2010                       | 8494                  | 0                                 | 13                         | 21274               |
| Timor-Leste         | 2016           | Timor-Leste Demographic and Health Survey 2016                            | 6455                  | 455                               | 0                          | 286785              |
| Togo                | 2006           | Togo Multiple Indicator Cluster Survey 2006                               | 4018                  | 0                                 | 6                          | 12896               |
| Togo                | 2010           | Togo Multiple Indicator Cluster Survey 2010                               | 4711                  | 0                                 | 6                          | 40021               |
| Togo                | 2013           | Togo Demographic and Health Survey 2013–2014                              | 3238                  | 328                               | 0                          | 77515               |
| Trinidad and Tobago | 2000           | Trinidad and Tobago Multiple Indicator Cluster Survey 2000                | 806                   | 0                                 | 15                         | 12940               |
| Trinidad and Tobago | 2011           | Trinidad and Tobago Multiple Indicator Cluster Survey 2011                | 1122                  | 0                                 | 5                          | 332558              |

| Country      | Survey year(s) | Survey Name                                                                             | Number of Individuals | Number of geo-positioned clusters | Number of polygons (areal) | GHDx NID           |
|--------------|----------------|-----------------------------------------------------------------------------------------|-----------------------|-----------------------------------|----------------------------|--------------------|
| Tunisia      | 2011–2012      | Tunisia Multiple Indicator Cluster Survey 2011–2012                                     | 2758                  | 0                                 | 9                          | 76709              |
| Tunisia      | 2018           | Tunisia Multiple Indicator Cluster Survey 2018                                          | 3366                  | 0                                 | 7                          | 409558             |
| Turkmenistan | 2006           | Turkmenistan Multiple Indicator Cluster Survey 2006                                     | 2048                  | 0                                 | 6                          | 13064              |
| Turkmenistan | 2015–2016      | Turkmenistan Multiple Indicator Cluster Survey 2015–2016                                | 3741                  | 0                                 | 6                          | 264583             |
| Uganda       | 2000–2001      | Uganda Demographic and Health Survey 2000–2001                                          | 4791                  | 269                               | 0                          | 20993              |
| Uganda       | 2006           | Uganda Demographic and Health Survey 2006                                               | 2242                  | 333                               | 0                          | 21014              |
| Uganda       | 2009–2010      | Uganda Living Standards Measurement Survey - Integrated Survey on Agriculture 2009–2010 | 1476                  | 282                               | 7                          | 81004              |
| Uganda       | 2011           | Uganda Demographic and Health Survey 2011                                               | 2097                  | 392                               | 0                          | 56021              |
| Uganda       | 2010–2011      | Uganda Living Standards Measurement Survey - Integrated Survey on Agriculture 2010–2011 | 1641                  | 415                               | 0                          | 142934             |
| Uganda       | 2011–2012      | Uganda Living Standards Measurement Survey - Integrated Survey on Agriculture 2011–2012 | 1590                  | 455                               | 0                          | 142935             |
| Uganda       | 2013–2014      | Uganda Living Standards Measurement Survey - Integrated Survey on Agriculture 2013–2014 | 1611                  | 0                                 | 358                        | 264959             |
| Uganda       | 2016           | Uganda Demographic and Health Survey 2016                                               | 4414                  | 679                               | 0                          | 286780             |
| Uzbekistan   | 2002           | Uzbekistan Special Demographic and Health Survey 2002                                   | 2664                  | 218                               | 0                          | 21039              |
| Uzbekistan   | 2006           | Uzbekistan Multiple Indicator Cluster Survey 2006                                       | 4925                  | 0                                 | 6                          | 13445              |
| Vietnam      | 2000           | Vietnam Multiple Indicator Cluster Survey 2000                                          | 3045                  | 0                                 | 8                          | 13708              |
| Vietnam      | 2001–2002      | Vietnam National Health Survey 2001–2002                                                | 11225                 | 0                                 | 61                         | 44586 <sup>†</sup> |
| Vietnam      | 2010–2011      | Vietnam Multiple Indicator Cluster Survey 2010–2011                                     | 3615                  | 0                                 | 590                        | 57999              |
| Yemen        | 2005–2006      | Yemen Household Budget Survey 2005–2006                                                 | 12672                 | 0                                 | 495                        | 22882              |
| Yemen        | 2012           | Yemen - Aden Nutritional Status and Mortality Survey 2012                               | 1120                  | 0                                 | 8                          | 244469             |
| Yemen        | 2012           | Yemen - Hajjah Nutritional Status and Mortality Survey 2012                             | 1300                  | 56                                | 0                          | 244471             |
| Yemen        | 2012           | Yemen - Rayma Nutritional Status and Mortality Survey 2012                              | 639                   | 0                                 | 6                          | 244472             |
| Yemen        | 2012           | Yemen - Taiz Nutritional Status and Mortality Survey 2012                               | 904                   | 37                                | 0                          | 244473             |
| Yemen        | 2012           | Yemen - Ibb Nutritional Status and Mortality Survey 2012                                | 1651                  | 55                                | 0                          | 246249             |

| Country  | Survey year(s) | Survey Name                                                     | Number of Individuals | Number of geo-positioned clusters | Number of polygons (areal) | GHDx NID            |
|----------|----------------|-----------------------------------------------------------------|-----------------------|-----------------------------------|----------------------------|---------------------|
| Yemen    | 2012           | Yemen - Lahj Nutritional Status and Mortality Survey 2012       | 1560                  | 0                                 | 1                          | 246254              |
| Yemen    | 2013           | Yemen Demographic and Health Survey 2013                        | 14569                 | 0                                 | 528                        | 112500 <sup>†</sup> |
| Yemen    | 2012–2013      | Yemen - Abyan Nutritional Status and Mortality Survey 2012–2013 | 1442                  | 32                                | 0                          | 246145              |
| Yemen    | 2013           | Yemen - Dhamar Nutritional Status and Mortality Survey 2013     | 1877                  | 40                                | 0                          | 246209 <sup>†</sup> |
| Yemen    | 2013           | Yemen - Mahweet Nutritional Status and Mortality Survey 2013    | 1626                  | 67                                | 0                          | 246250              |
| Yemen    | 2012–2013      | Yemen National Social Protection Monitoring Survey 2012–2013    | 23803                 | 306                               | 194                        | 249499 <sup>†</sup> |
| Yemen    | 2014           | Yemen Comprehensive Food Security Survey 2014                   | 13438                 | 0                                 | 359                        | 244480              |
| Yemen    | 2014           | Yemen - Hajjah Nutritional Status and Mortality Survey 2014     | 565                   | 60                                | 0                          | 246246              |
| Yemen    | 2014           | Yemen - Hodeidah Nutritional Status and Mortality Survey 2014   | 1412                  | 37                                | 0                          | 246248              |
| Yemen    | 2015           | Yemen - Aden Nutritional Status and Mortality Survey 2015       | 336                   | 0                                 | 6                          | 244463              |
| Yemen    | 2015           | Yemen - Al-Baidha Nutritional Status and Mortality Survey 2015  | 628                   | 27                                | 16                         | 244464              |
| Yemen    | 2015           | Yemen - Hajjah Nutritional Status and Mortality Survey 2015     | 1018                  | 45                                | 0                          | 244465              |
| Yemen    | 2015           | Yemen - Hodeidah Nutrition and Mortality Survey 2015            | 648                   | 0                                 | 17                         | 244467              |
| Yemen    | 2015           | Yemen - Lahj Nutritional Status and Mortality Survey 2015       | 978                   | 0                                 | 1                          | 244468              |
| Zambia   | 2001–2002      | Zambia Demographic and Health Survey 2001–2002                  | 5684                  | 0                                 | 72                         | 21102               |
| Zambia   | 2007           | Zambia Demographic and Health Survey 2007                       | 5450                  | 319                               | 0                          | 21117               |
| Zambia   | 2009           | Zambia Access to ACT Initiative Survey 2009                     | 1332                  | 1322                              | 0                          | 162031 <sup>†</sup> |
| Zambia   | 2013–2014      | Zambia Demographic and Health Survey 2013–2014                  | 11924                 | 719                               | 0                          | 77516               |
| Zimbabwe | 2005–2006      | Zimbabwe Demographic and Health Survey 2005–2006                | 4239                  | 394                               | 0                          | 21163               |
| Zimbabwe | 2009           | Zimbabwe Multiple Indicator Monitoring Survey 2009              | 6282                  | 0                                 | 10                         | 35493               |
| Zimbabwe | 2010–2011      | Zimbabwe Demographic and Health Survey 2010–2011                | 4316                  | 393                               | 0                          | 55992               |
| Zimbabwe | 2014           | Zimbabwe Multiple Indicator Cluster Survey 2014                 | 9651                  | 0                                 | 10                         | 152720              |
| Zimbabwe | 2015           | Zimbabwe Demographic and Health Survey 2015                     | 5040                  | 399                               | 0                          | 157066              |

85 **Supplementary Table 4: Survey Reports added to model.**

| Country      | Survey year(s) | Survey Name                                                                                          | Number of Individuals | Number of geo-positioned clusters | Number of polygons (areal) | GHDx NID            |
|--------------|----------------|------------------------------------------------------------------------------------------------------|-----------------------|-----------------------------------|----------------------------|---------------------|
| Burkina Faso | 2009           | Burkina Faso National Nutrition Survey 2009                                                          | 265,498               | 0                                 | 43                         | 56884               |
| Burkina Faso | 2016           | Burkina Faso National Nutrition Survey 2016                                                          | 108,449               | 0                                 | 13                         | 299307              |
| China        | 2002           | China National Nutrition Survey 2002 - China CDC                                                     | 27,525                | 0                                 | 128                        | 124479 <sup>†</sup> |
| China        | 2009–2015      | Secular Trends in Growth and Nutritional Outcomes of Children under Five Years Old in Xiamen, China  | 71,229                | 0                                 | 3                          | 398585              |
| Mauritania   | 2012           | Mauritania National Nutrition Survey Using SMART Methodology July 2012                               | 163,663               | 0                                 | 11                         | 275121              |
| Mauritania   | 2014           | Mauritania National Nutrition Survey Using the SMART Methodology August 2014                         | 166,139               | 0                                 | 11                         | 275123              |
| Mongolia     | 2004           | Mongolia National Nutrition Survey 2004                                                              | 45,316                | 0                                 | 21                         | 137528 <sup>†</sup> |
| Niger        | 2007           | Niger Nutrition and Child Survival Survey 2007                                                       | 454,450               | 0                                 | 8                          | 160103              |
| Niger        | 2008           | Niger Nutrition and Child Survival Survey 2008                                                       | 276,775               | 0                                 | 8                          | 160198              |
| Niger        | 2009           | Niger Nutrition and Child Survival Survey 2009                                                       | 470,951               | 0                                 | 8                          | 160053              |
| Niger        | 2011           | Niger Nutrition and Child Survival Survey 2011                                                       | 489,926               | 0                                 | 8                          | 316438              |
| Niger        | 2012           | Niger Nutrition and Child Survival Survey 2012                                                       | 597,220               | 0                                 | 8                          | 316440              |
| Niger        | 2013           | Niger Nutrition and Child Survival Survey 2013                                                       | 796,291               | 0                                 | 8                          | 316442              |
| Niger        | 2014           | Niger Nutrition and Child Survival Survey 2014                                                       | 975,149               | 0                                 | 8                          | 316444              |
| Nigeria      | 2010           | Nigeria Standardized Monitoring and Assessment of Relief and Transitions Survey, December 2010       | 73,134                | 0                                 | 8                          | 151724 <sup>†</sup> |
| Nigeria      | 2011           | Nigeria Standardized Monitoring and Assessment of Relief and Transitions Survey, July-August 2011    | 88,246                | 0                                 | 7                          | 151725 <sup>†</sup> |
| Nigeria      | 2012           | Nigeria Standardized Monitoring and Assessment of Relief and Transitions Survey, February-March 2012 | 104,742               | 0                                 | 8                          | 151727 <sup>†</sup> |
| Nigeria      | 2014           | Nigeria National Nutrition and Health Survey 2014                                                    | 260,912               | 0                                 | 37                         | 274708              |
| Nigeria      | 2015           | Nigeria National Nutrition and Health Survey 2015                                                    | 264,297               | 0                                 | 37                         | 274707              |

| Country      | Survey year(s) | Survey Name                                                                                                                                                               | Number of Individuals | Number of geo-positioned clusters | Number of polygons (areal) | GHDx NID |
|--------------|----------------|---------------------------------------------------------------------------------------------------------------------------------------------------------------------------|-----------------------|-----------------------------------|----------------------------|----------|
| Nigeria      | 2018           | Nigeria Demographic and Health Survey 2018                                                                                                                                | 11,204                | 0                                 | 37                         | 408484   |
| Pakistan     | 2007–2008      | Pakistan - Punjab Multiple Indicator Cluster Survey 2007–2008                                                                                                             | 71,721                | 0                                 | 175                        | 387340   |
| Sri Lanka    | 2009           | Sri Lanka Nutrition and Food Security Assessment 2009                                                                                                                     | 10,969                | 0                                 | 20                         | 141592   |
| Sri Lanka    | 2012           | Sri Lanka National Nutrition and Micronutrient Survey 2012                                                                                                                | 4,753                 | 0                                 | 10                         | 153000   |
| Sri Lanka    | 2016           | Sri Lanka Demographic and Health Survey 2016                                                                                                                              | 12,337                | 0                                 | 25                         | 326837   |
| Sri Lanka    | 2006–2007      | Sri Lanka Demographic and Health Survey 2006–2007                                                                                                                         | 13,528                | 0                                 | 25                         | 18815    |
| eSwatini     | 2008           | Swaziland National Nutrition Survey 2008                                                                                                                                  | 10,376                | 0                                 | 4                          | 141312   |
| Tajikistan   | 2001           | Tajikistan National Nutrition Survey 2001                                                                                                                                 | 46,075                | 0                                 | 4                          | 141797   |
| Thailand     | 2015–2016      | Thailand 14 Provinces Multiple Indicator Cluster Survey 2015–2016                                                                                                         | 32,485                | 0                                 | 14                         | 317305   |
| Tunisia      | 2000           | Tunisia Multiple Indicator Cluster Survey 2000                                                                                                                            | 78,685                | 0                                 | 6                          | 12983    |
| Tunisia      | 2006           | Tunisia Multiple Indicator Cluster Survey 2006                                                                                                                            | 24,013                | 0                                 | 9                          | 12985    |
| Turkmenistan | 2000           | Turkmenistan Demographic and Health Survey 2000                                                                                                                           | 148,724               | 0                                 | 6                          | 20956    |
| Venezuela    | 2016           | Venezuela - Capital District, Vargas, Miranda and Zulia Baseline of Sentinel Monitoring of Nutrition Status in Children Under 5 Years, SAMAN System October-December 2016 | 8,622                 | 0                                 | 4                          | 289278   |
| Vietnam      | 2009–2010      | Vietnam General Nutrition Survey 2009–2010                                                                                                                                | 286,085               | 0                                 | 63                         | 152422   |
| Vietnam      | 2011           | Vietnam Annual National Nutrition Monitoring 2011                                                                                                                         | 292,176               | 0                                 | 63                         | 293979†  |
| Vietnam      | 2012           | Vietnam Nutrition Surveillance 2012                                                                                                                                       | 297,529               | 0                                 | 63                         | 286277   |
| Vietnam      | 2012           | Vietnam Annual National Nutrition Monitoring 2012                                                                                                                         | 293,659               | 0                                 | 63                         | 293980†  |
| Vietnam      | 2013           | Vietnam Annual National Nutrition Monitoring 2013                                                                                                                         | 299,685               | 0                                 | 63                         | 293981†  |

| Country | Survey year(s) | Survey Name                                       | Number of Individuals | Number of geo-positioned clusters | Number of polygons (areal) | GHDx NID |
|---------|----------------|---------------------------------------------------|-----------------------|-----------------------------------|----------------------------|----------|
| Vietnam | 2014           | Vietnam Annual National Nutrition Monitoring 2014 | 98,433                | 0                                 | 63                         | 293982†  |

**Supplementary Table 5: Data excluded from model.**

| Country     | Survey year(s) | Survey Name                                                                                                       | Reason                                                                                               | GHDx NID |
|-------------|----------------|-------------------------------------------------------------------------------------------------------------------|------------------------------------------------------------------------------------------------------|----------|
| Afghanistan | 2015–2016      | <i>Afghanistan Demographic and Health Survey 2015–2016</i>                                                        | Age data is insufficiently granular (for calculations of height-for-age and weight-for-age z-scores) | 157018   |
| Bangladesh  | 2010–2013      | <i>Bangladesh - Dhaka Malnutrition and Enteric Disease Study 2009–2014</i>                                        | Anthropometric measurements not taken of a full set of under-fives                                   | 261683   |
| Bangladesh  | 2000           | <i>Bangladesh - Khulna and Dhaka Supporting Household Activities for Health, Assets, and Revenue Survey 2000</i>  | Data does not have interview dates or age in months                                                  | 153154   |
| Bangladesh  | 2015           | <i>Bangladesh Integrated Household Survey 2015</i>                                                                | Data does not have interview dates or age in months, insufficient sample weight data                 | 283269   |
| Bangladesh  | 2011–2012      | <i>Bangladesh Integrated Household Survey 2011–2012</i>                                                           | Insufficient sample weight data                                                                      | 153062   |
| Bangladesh  | 2002           | <i>Bangladesh - Dinajpur Supporting Household Activities for Health, Assets, and Revenue Survey, Round 1 2002</i> | Insufficient sample weight data                                                                      | 163056   |
| Bangladesh  | 2007–2011      | <i>Bangladesh - Mizrapur Global Enteric Multicenter Study 2007–2011</i>                                           | Insufficient sample weight data                                                                      | 224248   |
| Bangladesh  | 2011–2013      | <i>Bangladesh - Mizrapur Global Enteric Multicenter Study 2011–2013</i>                                           | Insufficient sample weight data                                                                      | 224855   |
| Bangladesh  | 2003           | <i>Bangladesh - Dinajpur Supporting Household Activities for Health, Assets, and Revenue Survey, Round 2 2003</i> | Insufficient sample weight data                                                                      | 231832   |
| Bangladesh  | 2003           | <i>Bangladesh - Dinajpur Supporting Household Activities for Health, Assets, and Revenue Survey, Round 3 2003</i> | Insufficient sample weight data                                                                      | 231835   |
| Bangladesh  | 2014–2017      | <i>Bangladesh - Dhaka Cohort Study of Cryptosporidiosis in Children 2014</i>                                      | Insufficient sample weight data                                                                      | 263389   |
| Benin       | 2011–2012      | <i>Benin Demographic and Health Survey 2011–2012</i>                                                              | Prevalence values for indicators were determined to be implausible                                   | 79839    |

| Country      | Survey year(s) | Survey Name                                                                       | Reason                                                                                                                                                                                         | GHDx NID |
|--------------|----------------|-----------------------------------------------------------------------------------|------------------------------------------------------------------------------------------------------------------------------------------------------------------------------------------------|----------|
| Brazil       | 2010–2013      | <i>Brazil - Fortaleza Malnutrition and Enteric Disease Study 2009–2014</i>        | Anthropometric measurements not taken of a full set of under-fives                                                                                                                             | 261873   |
| Burkina Faso | 2005           | <i>Burkina Faso Core Welfare Indicators Questionnaire Survey 2005</i>             | National prevalence values reported for one or more indicators were determined to be implausibly high based on country-level trend seen in 8 other Burkina Faso sources.                       | 22950    |
| Cameroon     | 2001           | <i>Cameroon Household Survey 2001</i>                                             | Anthropometric measurements not taken of a full set of under-fives                                                                                                                             | 2039     |
| Egypt        | 2015           | <i>Egypt Special Demographic and Health Survey 2015</i>                           | Non-proportional sample allocation designed to estimate the prevalence of hepatitis and certain other NCD risk factors, such that the survey sampling was not comparable to the other surveys. | 157026   |
| Ethiopia     | 2004           | <i>Ethiopia Rural Household Survey 2004</i>                                       | Age data is insufficiently granular (for calculations of height-for-age and weight-for-age z-scores)                                                                                           | 38496    |
| Ghana        | 2009–2010      | <i>Ghana Socioeconomic Panel Survey 2009–2010</i>                                 | National prevalence values reported for one or more indicators were determined to be implausibly high based on country-level trend seen in 8 other country-level Ghana sources.                | 236205   |
| India        | 2011–2013      | <i>India Human Development Survey 2011–2013</i>                                   | Sample size is not representative of its geography                                                                                                                                             | 165498   |
| India        | 2010–2013      | <i>India - Vellore Malnutrition and Enteric Disease Study 2009–2014</i>           | Anthropometric measurements not taken of a full set of under-fives                                                                                                                             | 261875   |
| India        | 2007–2008      | <i>India Tribal Second Repeat Survey of Diet and Nutritional Status 2007–2008</i> | Geographies could not be mapped                                                                                                                                                                | 129783   |
| Kenya        | 2004           | <i>Kenya Greater Eldoret Health and Development Survey 2004</i>                   | Insufficient sample weight data                                                                                                                                                                | 152561   |
| Kenya        | 2005           | <i>Kenya Greater Eldoret Health and Development Survey 2005</i>                   | Insufficient sample weight data                                                                                                                                                                | 152562   |

| Country    | Survey year(s) | Survey Name                                                                | Reason                                                                                               | GHDx NID |
|------------|----------------|----------------------------------------------------------------------------|------------------------------------------------------------------------------------------------------|----------|
| Kenya      | 2006           | <i>Kenya Greater Eldoret Health and Development Survey 2006</i>            | Insufficient sample weight data                                                                      | 152563   |
| Kenya      | 2008–2011      | <i>Kenya - Nyanza Global Enteric Multicenter Study 2008–2011</i>           | Insufficient sample weight data                                                                      | 224239   |
| Kenya      | 2011–2012      | <i>Kenya - Nyanza Global Enteric Multicenter Study 2011–2012</i>           | Insufficient sample weight data                                                                      | 224853   |
| Lebanon    | 2005–2006      | <i>Palestinians in Lebanon Multiple Indicator Cluster Survey 2005–2006</i> | Data is not representative of its geography                                                          | 7688     |
| Lebanon    | 2011           | <i>Palestinians in Lebanon Multiple Indicator Cluster Survey 2011</i>      | Data is not representative of its geography                                                          | 76708    |
| Mali       | 2007–2011      | <i>Mali - Bamako Global Enteric Multicenter Study 2007–2011</i>            | Insufficient sample weight data                                                                      | 224233   |
| Mali       | 2011–2013      | <i>Mali - Bamako Global Enteric Multicenter Study 2011–2013</i>            | Insufficient sample weight data                                                                      | 224848   |
| Mexico     | 2002           | <i>Mexico Family Life Survey 2002</i>                                      | Age data is insufficiently granular (for calculations of height-for-age and weight-for-age z-scores) | 8442     |
| Mexico     | 2015           | <i>Mexico Multiple Indicator Cluster Survey 2015</i>                       | Geographies could not be mapped                                                                      | 264590   |
| Mozambique | 2007–2011      | <i>Mozambique - Manhiça Global Enteric Multicenter Study 2007–2011</i>     | Insufficient sample weight data                                                                      | 224236   |
| Mozambique | 2011–2013      | <i>Mozambique - Manhiça Global Enteric Multicenter Study 2011–2013</i>     | Insufficient sample weight data                                                                      | 224849   |
| Nepal      | 2010–2013      | <i>Nepal - Bhaktapur Malnutrition and Enteric Disease Study 2009–2014</i>  | Anthropometric measurements not taken of a full set of under-fives                                   | 261880   |
| Nigeria    | 2008–2010      | <i>Nigeria Living Standards Survey 2008–2010</i>                           | Age data is insufficiently granular (for calculations of height-for-age and weight-for-age z-scores) | 151719   |
| Nigeria    | 2010–2011      | <i>Nigeria General Household Survey 2010–2011</i>                          | Age data is insufficiently granular (for calculations of height-for-age and weight-for-age z-scores) | 151802   |

| Country      | Survey year(s) | Survey Name                                                                                                                                        | Reason                                                                                               | GHDx NID      |
|--------------|----------------|----------------------------------------------------------------------------------------------------------------------------------------------------|------------------------------------------------------------------------------------------------------|---------------|
| Nigeria      | 2006           | <i>Nigeria Core Welfare Indicators Questionnaire Survey 2006</i>                                                                                   | Insufficient sample weight data                                                                      | 9522          |
| Nigeria      | 2011           | <i>Nigeria - Akwa Ibom Survey on Dietary Intakes, Vitamin A, and Iron Status of Women of Childbearing Age and Children 6-59 Months of Age 2011</i> | Insufficient sample weight data                                                                      | 283272        |
| Pakistan     | 2010–2013      | <i>Pakistan - Naushahro Feroze Malnutrition and Enteric Disease Study 2009–2014</i>                                                                | Anthropometric measurements not taken of a full set of under-fives                                   | 261883        |
| Pakistan     | 2008–2011      | <i>Pakistan - Karachi Global Enteric Multicenter Study 2008–2011</i>                                                                               | Insufficient sample weight data                                                                      | 224251        |
| Pakistan     | 2011–2013      | <i>Pakistan - Karachi Global Enteric Multicenter Study 2011–2013</i>                                                                               | Insufficient sample weight data                                                                      | 224856        |
| Peru         | 2010–2013      | <i>Peru - Loreto Malnutrition and Enteric Disease Study 2009–2014</i>                                                                              | Anthropometric measurements not taken of a full set of under-fives                                   | 261879        |
| Rwanda       | 2009           | <i>Rwanda Comprehensive Food Security and Vulnerability Assessment and Nutrition Survey 2009</i>                                                   | Anthropometric measurements not taken of a full set of under-fives                                   | 58188         |
| Somalia      | 2007           | <i>Somalia Nutrition Surveillance and Assessment 2007</i>                                                                                          | Data is duplicative                                                                                  | 358676        |
| Somalia      | 2008           | <i>Somalia Nutrition Surveillance and Assessment 2008</i>                                                                                          | Data is duplicative                                                                                  | 358679        |
| Somalia      | 2009           | <i>Somalia Nutrition Surveillance and Assessment 2009</i>                                                                                          | Data is duplicative                                                                                  | 358680        |
| Somalia      | 2010           | <i>Somalia Nutrition Surveillance and Assessment 2010</i>                                                                                          | Data is duplicative                                                                                  | 358681        |
| Somalia      | 2001           | <i>Somalia Nutrition Surveillance and Assessment 2001–2006</i>                                                                                     | Geographies could not be mapped                                                                      | 358670-358675 |
| South Africa | 2010–2013      | <i>South Africa - Venda Malnutrition and Enteric Disease Study 2009–2014</i>                                                                       | Anthropometric measurements not taken of a full set of under-fives                                   | 261887        |
| South Sudan  | 2009           | <i>Sudan - South National Baseline Household Survey (NBHS) 2009</i>                                                                                | Data does not have interview dates or age in months                                                  | 30368         |
| Tanzania     | 2008–2009      | <i>Tanzania National Panel Survey 2008–2009</i>                                                                                                    | Age data is insufficiently granular (for calculations of height-for-age and weight-for-age z-scores) | 27297         |
| Tanzania     | 2004           | <i>Tanzania - Shinyanga Core Welfare Indicators Questionnaire Survey 2004</i>                                                                      | Age data is insufficiently granular (for calculations of height-for-age and weight-for-age z-scores) | 31786         |

| Country    | Survey year(s) | Survey Name                                                               | Reason                                                                                               | GHDx NID |
|------------|----------------|---------------------------------------------------------------------------|------------------------------------------------------------------------------------------------------|----------|
| Tanzania   | 2005           | <i>Tanzania Core Welfare Indicators Questionnaire Survey 2005</i>         | Age data is insufficiently granular (for calculations of height-for-age and weight-for-age z-scores) | 31797    |
| Tanzania   | 2010–2013      | <i>Tanzania - Haydom Malnutrition and Enteric Disease Study 2009–2014</i> | Anthropometric measurements not taken of a full set of under-fives                                   | 261889   |
| Tanzania   | 2010           | <i>Tanzania - Kagera Living Standards Measurement Study 2010</i>          | Data is not representative of its geography                                                          | 93807    |
| The Gambia | 2007–2011      | <i>Gambia - Basse Global Enteric Multicenter Study 2007–2011</i>          | Insufficient sample weight data                                                                      | 222752   |
| The Gambia | 2011–2013      | <i>Gambia - Basse Global Enteric Multicenter Study 2011–2013</i>          | Insufficient sample weight data                                                                      | 223566   |

90

### 2.3 Covariates

95 A variety of environmental and socioeconomic variables were used to predict overweight and wasting outcomes. Where available, the finest spatiotemporal resolution of gridded datasets was used. In addition to the covariates detailed below, country-level variables of lag distributed income per capita and the proportion of the population with access to adequate sanitation were included in models for overweight and wasting.

**Supplementary Table 6: Covariates used in mapping.**

| Covariate                                                     | Temporal resolution | Source                                                                    | Reference                                                                                                                                                    |
|---------------------------------------------------------------|---------------------|---------------------------------------------------------------------------|--------------------------------------------------------------------------------------------------------------------------------------------------------------|
| Travel time to nearest settlement >50,000 inhabitants*<br>(1) | Static              | Big Data Institute, Nuffield Department of Medicine, University of Oxford | Weiss, D. J. <i>et al.</i> A global map of travel time to cities to assess inequalities in accessibility in 2015. <i>Nature</i> <b>533</b> , 333-336 (2018). |

| Covariate                                                                        | Temporal resolution | Source                                                                | Reference                                                                                                                                                                                                                                                                                                                                                                                                                                                                                                                              |
|----------------------------------------------------------------------------------|---------------------|-----------------------------------------------------------------------|----------------------------------------------------------------------------------------------------------------------------------------------------------------------------------------------------------------------------------------------------------------------------------------------------------------------------------------------------------------------------------------------------------------------------------------------------------------------------------------------------------------------------------------|
| Average daily mean rainfall (Precipitation) <b>(2)</b>                           | Annual              | CRUTS                                                                 | Harris, I., Jones, P. d., Osborn, T. j. & Lister, D. h. Updated high-resolution grids of monthly climatic observations – the CRU TS3.10 dataset. <i>Int. J. Climatol.</i> <b>34</b> , 623–642 (2014).<br>University of East Anglia. Climatic Research Unit TS v. 3.24 dataset. Available at: <a href="https://crudata.uea.ac.uk/cru/data/hrg/cru_ts_3.24.01/">https://crudata.uea.ac.uk/cru/data/hrg/cru_ts_3.24.01/</a> . (Accessed: 24th July 2017).                                                                                 |
| Educational attainment in women of reproductive age (15–49 years old) <b>(3)</b> | Annual              | Institute for Health Metrics and Evaluation, University of Washington | Graetz, N., <i>et al.</i> Mapping disparities in education across low- and middle-income countries. <i>Nature</i> <b>577</b> , 235–238 (2020).                                                                                                                                                                                                                                                                                                                                                                                         |
| Enhanced Vegetation Index (EVI) <b>(4)</b>                                       | Annual              | MODIS                                                                 | Huete, A., Justice, C. & van Leeuwen, W. MODIS vegetation index (MOD 13) algorithm theoretical basis document. (1999).<br>USGS & NASA. Vegetation indices 16-Day L3 global 500m MOD13A1 dataset. Available at: <a href="https://lpdaac.usgs.gov/products/mod13a1v006/">https://lpdaac.usgs.gov/products/mod13a1v006/</a> . (Accessed: 25th July 2017)<br>Weiss, D. J. et al. An effective approach for gap-filling continental scale remotely sensed time-series. <i>Isprs J. Photogramm. Remote Sens.</i> <b>98</b> , 106–118 (2014). |

| Covariate                                      | Temporal resolution | Source                   | Reference                                                                                                                                                                                                                                                                                                                              |
|------------------------------------------------|---------------------|--------------------------|----------------------------------------------------------------------------------------------------------------------------------------------------------------------------------------------------------------------------------------------------------------------------------------------------------------------------------------|
| Fertility<br><b>(5)</b>                        | Annual              | WorldPop (derived)       | Lloyd, C. T., Sorichetta, A. & Tatem, A. J. High resolution global gridded data for use in population studies. <i>Sci. Data</i> <b>4</b> , sdata20171 (2017).<br><br>World Pop. Get data. Available at: <a href="http://www.worldpop.org.uk/data/get_data/">http://www.worldpop.org.uk/data/get_data/</a> . (Accessed: 25th July 2017) |
| Growing season length*<br><b>(6)</b>           | Static              | FAO                      | FAO. GAEZ - Global Agro-Ecological Zones data portal. Available at: <a href="http://www.fao.org/nr/gaez/about-data-portal/en/">http://www.fao.org/nr/gaez/about-data-portal/en/</a> . (Accessed: 25th July 2017)<br>FAO. GAEZ - Global Agro-Ecological Zones users guide. (2012).                                                      |
| Urbanicity<br><b>(7)</b>                       | Annual              | European Commission/GHS  | Pesaresi, M. et al. Operating procedure for the production of the Global Human Settlement Layer from Landsat data of the epochs 1975, 1990, 2000, and 2014. (Publications Office of the European Union, 2016).                                                                                                                         |
| Nutritional yield for vitamin A*<br><b>(8)</b> | Static              | Herrero et al (modelled) | Herrero, M. et al. Farming and the geography of nutrient production for human use: a transdisciplinary analysis. <i>Lancet Planet. Health</i> <b>1</b> , e33–e42 (2017).                                                                                                                                                               |
| Nutritional yield for protein*<br><b>(9)</b>   | Static              | Herrero et al (modelled) | Herrero, M. et al. Farming and the geography of nutrient production for human use: a transdisciplinary analysis. <i>Lancet Planet. Health</i> <b>1</b> , e33–e42 (2017).                                                                                                                                                               |
| Irrigation*<br><b>(10)</b>                     | Static              | University of Frankfurt  | Goethe-Universität. Generation of a digital global map of irrigation areas. Available at: <a href="https://www.uni-frankfurt.de/45218039/Global_Irrigation_Map">https://www.uni-frankfurt.de/45218039/Global_Irrigation_Map</a> . (Accessed: 25th July 2017)                                                                           |

| Covariate                                                                                                                              | Temporal resolution | Source                      | Reference                                                                                                                                                                                                                                                                                                                                    |
|----------------------------------------------------------------------------------------------------------------------------------------|---------------------|-----------------------------|----------------------------------------------------------------------------------------------------------------------------------------------------------------------------------------------------------------------------------------------------------------------------------------------------------------------------------------------|
| Nutritional yield for Iron*<br><b>(11)</b>                                                                                             | Static              | Herrero et al<br>(modelled) | Herrero, M. et al. Farming and the geography of nutrient production for human use: a transdisciplinary analysis. <i>Lancet Planet. Health</i> <b>1</b> , e33–e42 (2017).                                                                                                                                                                     |
| Population<br><b>(12)</b>                                                                                                              | Annual              | WorldPop                    | Lloyd, C. T., Sorichetta, A. & Tatem, A. J. High resolution global gridded data for use in population studies. <i>Sci. Data</i> <b>4</b> , sdata20171 (2017).<br><br>World Pop. Get data. Available at:<br><a href="http://www.worldpop.org.uk/data/get_data/">http://www.worldpop.org.uk/data/get_data/</a> .<br>(Accessed: 25th July 2017) |
| *Temporally dynamic covariates which were reformatted as a synoptic mean over each estimation period or as a mid-period year estimate. |                     |                             |                                                                                                                                                                                                                                                                                                                                              |

105 **Supplementary Table 7: Model prior sensitivity analyses. The models included 420 geo-referenced household surveys representing over 3 million under-5 children. Pearson correlation method was used to compute correlation values.**

| Indicator  | Model results compared | Correlation |         |         | Mean absolute error |         |         | 90 <sup>th</sup> percentile absolute difference |         |         | Percent of overlapping uncertainty intervals |         |         |
|------------|------------------------|-------------|---------|---------|---------------------|---------|---------|-------------------------------------------------|---------|---------|----------------------------------------------|---------|---------|
|            |                        | Grid cell   | Admin 1 | Admin 2 | Grid cell           | Admin 1 | Admin 2 | Grid cell                                       | Admin 1 | Admin 2 | Grid cell                                    | Admin 1 | Admin 2 |
| Overweight | Model 2                | 0.991       | 0.995   | 0.995   | 0.163               | 0.317   | 0.372   | 0.918                                           | 0.764   | 0.884   | 100                                          | 100     | 100     |
|            | Model 3                | 0.994       | 0.996   | 0.997   | 0.218               | 0.240   | 0.322   | 0.618                                           | 0.536   | 0.722   | 100                                          | 100     | 100     |
|            | Model 4                | 0.990       | 0.991   | 0.991   | 0.263               | 0.317   | 0.372   | 0.918                                           | 0.764   | 0.884   | 100                                          | 100     | 100     |
|            | Model 5                | 0.995       | 0.998   | 0.997   | 0.220               | 0.240   | 0.322   | 0.618                                           | 0.536   | 0.722   | 100                                          | 100     | 100     |
| Wasting    | Model 2                | 0.997       | 0.998   | 0.998   | 0.173               | 0.237   | 0.382   | 0.817                                           | 0.664   | 0.784   | 100                                          | 100     | 100     |
|            | Model 3                | 0.998       | 0.999   | 0.997   | 0.118               | 0.231   | 0.332   | 0.755                                           | 0.666   | 0.762   | 100                                          | 100     | 100     |
|            | Model 4                | 0.999       | 0.998   | 0.998   | 0.163               | 0.227   | 0.372   | 0.786                                           | 0.752   | 0.894   | 100                                          | 100     | 100     |
|            | Model 5                | 0.999       | 0.998   | 0.997   | 0.120               | 0.244   | 0.322   | 0.708                                           | 0.588   | 0.755   | 100                                          | 100     | 100     |
| AROC       | Model 2                | 0.998       | 0.998   | 0.998   | 0.126               | 0.287   | 0.373   | 0.968                                           | 0.732   | 0.899   | 100                                          | 100     | 100     |
|            | Model 3                | 0.998       | 0.999   | 0.999   | 0.168               | 0.321   | 0.368   | 0.788                                           | 0.636   | 0.912   | 100                                          | 100     | 100     |
|            | Model 4                | 0.994       | 0.997   | 0.998   | 0.195               | 0.347   | 0.375   | 0.891                                           | 0.954   | 1.250   | 100                                          | 100     | 100     |
|            | Model 5                | 0.996       | 0.998   | 0.997   | 0.175               | 0.348   | 0.382   | 0.918                                           | 0.936   | 1.172   | 100                                          | 100     | 100     |

**Supplementary Table 8: Spatial hyperparameter priors by region.**

| Region                            | $\mu_{\theta_1}$ | $\sigma_{\theta_1}^2$ | $\mu_2$  | $\sigma_{\theta_2}^2$ |
|-----------------------------------|------------------|-----------------------|----------|-----------------------|
| Andean South America              | 0.011191         | 10                    | -1.2767  | 10                    |
| Central America and the Caribbean | 0.209786         | 10                    | -1.4753  | 10                    |
| Central sub-Saharan Africa        | -0.20487         | 10                    | -1.06064 | 10                    |
| East Asia                         | 0.377015         | 10                    | -1.64253 | 10                    |
| Eastern sub-Saharan Africa        | 0.137024         | 10                    | -1.40254 | 10                    |
| Middle East                       | -0.22044         | 10                    | -1.04507 | 10                    |
| North Africa                      | 0.296578         | 10                    | -1.56209 | 10                    |
| Southeast Asia and Oceania        | 0.423677         | 10                    | -1.68919 | 10                    |
| South and Central Asia            | 0.122237         | 10                    | -1.38775 | 10                    |
| Southern sub-Saharan Africa       | -0.41501         | 10                    | -0.8505  | 10                    |
| Tropical South America            | 0.130726         | 10                    | -1.39624 | 10                    |
| Western sub-Saharan Africa        | 0.201186         | 10                    | -1.4667  | 10                    |

### 3.0 Model Results

**Supplementary Table 9: Overweight fitted parameters.**

115 Lower, median, and upper quantiles (percentiles 0.025, 0.50, 0.975) are displayed for the main parameters from the overweight models by region. The fixed effects covariates corresponding to the predicted ensemble rasters are shown in the first five columns, while fitted values for the spatiotemporal field hyperparameters and the precisions (inverse variance) for our random effects are shown in the last five columns.

| Regions                           | Percentiles  | int   | gam   | gbm   | lasso | Nominal Range | Nominal Variance | AR1 rho | Precision for NUG.ID | Precision for CTRY.ID |
|-----------------------------------|--------------|-------|-------|-------|-------|---------------|------------------|---------|----------------------|-----------------------|
| North Africa                      | <b>0.025</b> | -0.69 | 0.00  | 0.64  | -0.01 | 1.79          | 0.16             | 0.01    | 4.93                 | 2.10                  |
|                                   | <b>0.50</b>  | -0.43 | 0.12  | 0.76  | 0.12  | 2.40          | 0.22             | 0.45    | 5.70                 | 6.04                  |
|                                   | <b>0.975</b> | -0.17 | 0.25  | 0.88  | 0.25  | 3.15          | 0.27             | 0.66    | 6.74                 | 20.06                 |
| Central sub-Saharan Africa        | <b>0.025</b> | -0.28 | -0.03 | 0.26  | 0.29  | 2.82          | 0.17             | 0.39    | 8.71                 | 5.97                  |
|                                   | <b>0.50</b>  | -0.11 | 0.11  | 0.42  | 0.47  | 3.90          | 0.22             | 0.66    | 11.86                | 17.90                 |
|                                   | <b>0.975</b> | 0.06  | 0.25  | 0.59  | 0.65  | 5.22          | 0.30             | 0.80    | 16.29                | 53.58                 |
| Middle East                       | <b>0.025</b> | -0.58 | -0.05 | -0.14 | 0.60  | 2.03          | 0.28             | 0.54    | 2.91                 | $1.2 \times 10^2$     |
|                                   | <b>0.50</b>  | -0.28 | 0.11  | 0.09  | 0.80  | 3.19          | 0.47             | 0.80    | 3.55                 | $1.4 \times 10^2$     |
|                                   | <b>0.975</b> | 0.02  | 0.27  | 0.32  | 1.00  | 5.06          | 0.81             | 0.92    | 4.34                 | $6.9 \times 10^2$     |
| Central America and the Caribbean | <b>0.025</b> | -0.18 | -0.15 | 0.13  | 0.34  | 1.99          | 0.07             | 0.58    | 10.56                | 5.23                  |
|                                   | <b>0.50</b>  | 0.01  | 0.08  | 0.34  | 0.57  | 3.40          | 0.11             | 0.81    | 15.31                | 17.73                 |
|                                   | <b>0.975</b> | 0.20  | 0.31  | 0.56  | 0.80  | 5.69          | 0.18             | 0.92    | 23.05                | 65.25                 |
| Western sub-Saharan Africa        | <b>0.025</b> | -0.38 | -0.18 | 0.23  | 0.58  | 3.75          | 0.25             | 0.54    | 2.65                 | 4.10                  |
|                                   | <b>0.50</b>  | -0.19 | -0.06 | 0.34  | 0.72  | 4.53          | 0.31             | 0.71    | 2.87                 | 8.73                  |
|                                   | <b>0.975</b> | 0.01  | 0.06  | 0.45  | 0.85  | 5.78          | 0.39             | 0.80    | 3.12                 | 18.82                 |
| Andean South America              | <b>0.025</b> | 0.07  | 0.32  | 0.74  | -0.31 | 0.00          | 0.00             | 0.65    | $1.1 \times 10^2$    | 15.92                 |
|                                   | <b>0.50</b>  | 0.14  | 0.40  | 0.83  | -0.22 | 0.06          | 0.00             | 0.97    | $1.7 \times 10^3$    | 52.81                 |
|                                   | <b>0.975</b> | 0.21  | 0.48  | 0.91  | -0.14 | 0.33          | 0.00             | 1.00    | $3.0 \times 10^5$    | 131.15                |
| Southern sub-Saharan Africa       | <b>0.025</b> | -0.21 | 0.13  | 0.03  | 0.33  | 3.83          | 0.06             | 0.30    | $1.5 \times 10^2$    | 8.56                  |
|                                   | <b>0.50</b>  | -0.03 | 0.30  | 0.20  | 0.50  | 5.80          | 0.10             | 0.67    | $1.4 \times 10^3$    | 27.24                 |
|                                   | <b>0.975</b> | 0.15  | 0.48  | 0.37  | 0.67  | 8.77          | 0.16             | 0.84    | $7.0 \times 10^4$    | 82.25                 |

|                            |              |       |       |       |       |       |      |      |                   |                   |
|----------------------------|--------------|-------|-------|-------|-------|-------|------|------|-------------------|-------------------|
| Eastern sub-Saharan Africa | <b>0.025</b> | -0.14 | 0.03  | 0.24  | -0.18 | 3.83  | 0.01 | 0.65 | $1.4 \times 10^2$ | $1.1 \times 10^3$ |
|                            | <b>0.50</b>  | -0.01 | 0.34  | 0.55  | 0.11  | 9.96  | 0.04 | 0.92 | $1.3 \times 10^4$ | $1.3 \times 10^4$ |
|                            | <b>0.975</b> | 0.12  | 0.65  | 0.86  | 0.39  | 24.67 | 0.12 | 0.99 | $6.8 \times 10^4$ | $6.9 \times 10^4$ |
| Tropical South America     | <b>0.025</b> | -0.91 | -0.02 | 0.33  | 0.39  | 2.85  | 0.27 | 0.74 | 3.65              | 0.34              |
|                            | <b>0.50</b>  | -0.37 | 0.07  | 0.43  | 0.50  | 3.56  | 0.33 | 0.81 | 4.01              | 0.62              |
|                            | <b>0.975</b> | 0.17  | 0.16  | 0.52  | 0.61  | 4.31  | 0.40 | 0.86 | 4.44              | 1.27              |
| East Asia                  | <b>0.025</b> | -0.61 | -0.03 | -0.11 | 0.57  | 7.62  | 0.33 | 0.57 | 10.72             | 1.32              |
|                            | <b>0.50</b>  | -0.17 | 0.09  | 0.11  | 0.79  | 10.02 | 0.46 | 0.78 | 14.72             | 3.69              |
|                            | <b>0.975</b> | 0.26  | 0.21  | 0.33  | 1.02  | 13.18 | 0.64 | 0.88 | 20.49             | 9.89              |
| Southeast Asia and Oceania | <b>0.025</b> | -0.95 | -0.10 | 0.30  | 0.29  | 4.81  | 0.55 | 0.47 | 1.84              | 2.89              |
|                            | <b>0.50</b>  | -0.63 | 0.04  | 0.49  | 0.47  | 5.62  | 0.69 | 0.78 | 1.93              | 7.99              |
|                            | <b>0.975</b> | -0.31 | 0.18  | 0.67  | 0.66  | 6.67  | 0.84 | 0.87 | 2.01              | 18.87             |
| South and Central Asia     | <b>0.025</b> | -0.49 | 0.00  | 0.37  | 0.20  | 4.22  | 0.17 | 0.62 | 5.42              | 1.86              |
|                            | <b>0.50</b>  | -0.17 | 0.13  | 0.51  | 0.36  | 5.67  | 0.24 | 0.78 | 6.60              | 5.36              |
|                            | <b>0.975</b> | 0.15  | 0.27  | 0.65  | 0.51  | 7.71  | 0.34 | 0.87 | 8.44              | 14.70             |

**Supplementary Table 10: Wasting fitted parameters.**

120 Lower, median, and upper quantiles (percentiles 0.025, 0.50, 0.975) are displayed for the main parameters from the wasting models by region. The fixed effects covariates corresponding to the predicted ensemble rasters are shown in the first five columns, while fitted values for the spatiotemporal field hyperparameters and the precisions (inverse variance) for our random effects are shown in the last five columns.

| Regions                    | Percentiles  | int   | gam   | gbm  | lasso | Nominal Range | Nominal Variance | AR1 rho | Precision for NUG.ID | Precision for CTRY.ID |
|----------------------------|--------------|-------|-------|------|-------|---------------|------------------|---------|----------------------|-----------------------|
| North Africa               | <b>0.025</b> | -0.14 | 0.30  | 0.41 | 0.00  | 2.33          | 0.18             | 0.01    | $1.3 \times 10^3$    | 19.15                 |
|                            | <b>0.50</b>  | -0.04 | 0.39  | 0.50 | 0.11  | 2.77          | 0.22             | 0.39    | $1.5 \times 10^4$    | 119.64                |
|                            | <b>0.975</b> | 0.06  | 0.47  | 0.59 | 0.22  | 3.35          | 0.26             | 0.63    | $7.0 \times 10^4$    | 1662.94               |
| Central sub-Saharan Africa | <b>0.025</b> | -0.24 | -0.34 | 0.25 | 0.59  | 3.36          | 0.07             | 0.60    | 920.87               | 6.53                  |
|                            | <b>0.50</b>  | -0.09 | -0.19 | 0.41 | 0.77  | 4.41          | 0.10             | 0.77    | $1.2 \times 10^4$    | 16.79                 |
|                            | <b>0.975</b> | 0.06  | -0.03 | 0.58 | 0.96  | 5.91          | 0.14             | 0.87    | $6.3 \times 10^4$    | 41.49                 |
| Middle East                | <b>0.025</b> | -0.25 | 0.05  | 0.28 | 0.17  | 2.08          | 0.13             | 0.18    | 11.44                | 3.77                  |
|                            | <b>0.50</b>  | -0.01 | 0.20  | 0.45 | 0.35  | 3.09          | 0.18             | 0.58    | 14.28                | 14.62                 |

|                                          |              |       |       |      |       |       |      |      |                       |                       |
|------------------------------------------|--------------|-------|-------|------|-------|-------|------|------|-----------------------|-----------------------|
|                                          | <b>0.975</b> | 0.23  | 0.34  | 0.62 | 0.54  | 4.50  | 0.27 | 0.79 | 18.42                 | 50.22                 |
| <b>Central America and the Caribbean</b> | <b>0.025</b> | -0.24 | 0.07  | 0.19 | 0.12  | 2.08  | 0.08 | 0.61 | 4.78                  | 1053.77               |
|                                          | <b>0.50</b>  | -0.10 | 0.28  | 0.40 | 0.31  | 4.00  | 0.13 | 0.83 | 6.72                  | 1.2 x 10 <sup>4</sup> |
|                                          | <b>0.975</b> | 0.05  | 0.50  | 0.62 | 0.50  | 6.66  | 0.26 | 0.92 | 10.65                 | 6.5 x 10 <sup>4</sup> |
| <b>Western sub-Saharan Africa</b>        | <b>0.025</b> | -0.18 | -0.11 | 0.37 | 0.38  | 2.68  | 0.07 | 0.65 | 17.22                 | 13.16                 |
|                                          | <b>0.50</b>  | -0.08 | -0.01 | 0.49 | 0.52  | 3.24  | 0.09 | 0.75 | 19.13                 | 29.21                 |
|                                          | <b>0.975</b> | 0.02  | 0.10  | 0.60 | 0.66  | 3.82  | 0.10 | 0.82 | 21.62                 | 61.46                 |
| <b>Andean South America</b>              | <b>0.025</b> | -0.02 | 0.00  | 0.17 | 0.34  | 6.23  | 0.06 | 0.64 | 1.3 x 10 <sup>3</sup> | 2.73                  |
|                                          | <b>0.50</b>  | 0.32  | 0.15  | 0.34 | 0.51  | 12.38 | 0.13 | 0.88 | 1.3 x 10 <sup>4</sup> | 10.56                 |
|                                          | <b>0.975</b> | 0.67  | 0.30  | 0.50 | 0.68  | 22.30 | 0.27 | 0.96 | 6.7 x 10 <sup>4</sup> | 55.95                 |
| <b>Southern sub-Saharan Africa</b>       | <b>0.025</b> | -0.11 | -0.13 | 0.14 | 0.37  | 3.21  | 0.07 | 0.58 | 1.4 x 10 <sup>3</sup> | 1093.99               |
|                                          | <b>0.50</b>  | 0.04  | 0.06  | 0.35 | 0.59  | 5.31  | 0.12 | 0.80 | 1.5 x 10 <sup>4</sup> | 1.3 x 10 <sup>4</sup> |
|                                          | <b>0.975</b> | 0.18  | 0.26  | 0.56 | 0.81  | 8.44  | 0.20 | 0.91 | 7.1 x 10 <sup>4</sup> | 6.8 x 10 <sup>4</sup> |
| <b>Eastern sub-Saharan Africa</b>        | <b>0.025</b> | -0.64 | -0.25 | 0.49 | -0.06 | 21.80 | 0.04 | 0.48 | 1.4 x 10 <sup>3</sup> | 1270.93               |
|                                          | <b>0.50</b>  | -0.13 | 0.03  | 0.74 | 0.23  | 41.83 | 0.10 | 0.84 | 1.4 x 10 <sup>3</sup> | 1.3 x 10 <sup>4</sup> |
|                                          | <b>0.975</b> | 0.38  | 0.30  | 0.99 | 0.53  | 79.12 | 0.30 | 0.96 | 6.7 x 10 <sup>4</sup> | 6.7 x 10 <sup>4</sup> |
| <b>Tropical South America</b>            | <b>0.025</b> | -0.20 | -0.04 | 0.29 | 0.40  | 2.17  | 0.10 | 0.77 | 6.75                  | 4.34                  |
|                                          | <b>0.50</b>  | -0.05 | 0.08  | 0.39 | 0.53  | 2.72  | 0.13 | 0.84 | 7.46                  | 9.29                  |
|                                          | <b>0.975</b> | 0.10  | 0.20  | 0.50 | 0.65  | 3.31  | 0.15 | 0.89 | 8.22                  | 17.88                 |
| <b>East Asia</b>                         | <b>0.025</b> | -0.50 | -0.06 | 0.37 | 0.32  | 4.78  | 0.26 | 0.67 | 54.30                 | 3.68                  |
|                                          | <b>0.50</b>  | -0.22 | 0.05  | 0.50 | 0.45  | 6.57  | 0.35 | 0.82 | 106.31                | 11.74                 |
|                                          | <b>0.975</b> | 0.06  | 0.17  | 0.63 | 0.57  | 9.08  | 0.51 | 0.90 | 229.03                | 34.39                 |
| <b>Southeast Asia and Oceania</b>        | <b>0.025</b> | -0.61 | -0.08 | 0.61 | 0.16  | 3.20  | 0.12 | 0.80 | 6.76                  | 4.71                  |
|                                          | <b>0.50</b>  | -0.43 | 0.01  | 0.71 | 0.28  | 4.08  | 0.15 | 0.86 | 7.24                  | 15.39                 |
|                                          | <b>0.975</b> | -0.25 | 0.11  | 0.81 | 0.39  | 4.92  | 0.20 | 0.91 | 7.70                  | 44.37                 |
| <b>South and Central Asia</b>            | <b>0.025</b> | -0.07 | 0.18  | 0.57 | -0.11 | 1.96  | 0.08 | 0.13 | 84.31                 | 37.53                 |
|                                          | <b>0.50</b>  | 0.01  | 0.29  | 0.69 | 0.03  | 2.51  | 0.10 | 0.51 | 115.59                | 222.74                |
|                                          | <b>0.975</b> | 0.09  | 0.39  | 0.80 | 0.17  | 3.19  | 0.12 | 0.71 | 157.61                | 2118.83               |

**Supplementary Table 11: Change of overweight and wasting from 2000 to 2017 at the first administrative level in all LMICs.**

| Country                          | Wasting increased, Overweight decreased | Wasting increased, Overweight increased | Wasting decreased, overweight decreased | Wasting decreased, overweight increased | Total number of units |
|----------------------------------|-----------------------------------------|-----------------------------------------|-----------------------------------------|-----------------------------------------|-----------------------|
| Afghanistan                      | 1                                       | 0                                       | 20                                      | 13                                      | 34                    |
| Algeria                          | 0                                       | 0                                       | 5                                       | 43                                      | 48                    |
| Angola                           | 0                                       | 0                                       | 6                                       | 12                                      | 18                    |
| Bangladesh                       | 0                                       | 1                                       | 0                                       | 6                                       | 7                     |
| Belize                           | 0                                       | 0                                       | 2                                       | 4                                       | 6                     |
| Benin                            | 0                                       | 6                                       | 0                                       | 6                                       | 12                    |
| Bhutan                           | 0                                       | 7                                       | 2                                       | 11                                      | 20                    |
| Bolivia                          | 0                                       | 0                                       | 6                                       | 3                                       | 9                     |
| Botswana                         | 0                                       | 0                                       | 0                                       | 16                                      | 16                    |
| Brazil                           | 0                                       | 0                                       | 2                                       | 25                                      | 27                    |
| Burkina Faso                     | 0                                       | 0                                       | 0                                       | 13                                      | 13                    |
| Burundi                          | 0                                       | 2                                       | 1                                       | 14                                      | 17                    |
| Cambodia                         | 0                                       | 0                                       | 4                                       | 21                                      | 25                    |
| Cameroon                         | 0                                       | 0                                       | 7                                       | 3                                       | 10                    |
| Cape Verde                       | 0                                       | 0                                       | 0                                       | 22                                      | 22                    |
| Central African Republic         | 1                                       | 0                                       | 16                                      | 0                                       | 17                    |
| Chad                             | 2                                       | 4                                       | 8                                       | 9                                       | 23                    |
| China                            | 0                                       | 0                                       | 13                                      | 20                                      | 33                    |
| Colombia                         | 0                                       | 0                                       | 15                                      | 16                                      | 32                    |
| Comoros                          | 0                                       | 0                                       | 3                                       | 0                                       | 3                     |
| Costa Rica                       | 0                                       | 0                                       | 0                                       | 7                                       | 7                     |
| Cuba                             | 0                                       | 0                                       | 0                                       | 16                                      | 16                    |
| Côte d'Ivoire                    | 0                                       | 0                                       | 12                                      | 2                                       | 14                    |
| Democratic Republic of the Congo | 0                                       | 0                                       | 7                                       | 19                                      | 26                    |
| Djibouti                         | 0                                       | 0                                       | 0                                       | 5                                       | 5                     |
| Dominican Republic               | 0                                       | 1                                       | 4                                       | 27                                      | 32                    |
| Ecuador                          | 0                                       | 0                                       | 0                                       | 24                                      | 24                    |
| Egypt                            | 1                                       | 6                                       | 11                                      | 9                                       | 27                    |
| El Salvador                      | 0                                       | 2                                       | 2                                       | 10                                      | 14                    |
| Equatorial Guinea                | 0                                       | 0                                       | 0                                       | 6                                       | 7                     |
| Eritrea                          | 0                                       | 1                                       | 0                                       | 5                                       | 6                     |
| Ethiopia                         | 0                                       | 0                                       | 0                                       | 11                                      | 11                    |
| French Guiana                    | 0                                       | 0                                       | 0                                       | 2                                       | 2                     |
| Gabon                            | 0                                       | 1                                       | 0                                       | 8                                       | 9                     |
| Gambia                           | 0                                       | 3                                       | 1                                       | 2                                       | 6                     |
| Ghana                            | 0                                       | 0                                       | 2                                       | 8                                       | 10                    |
| Guatemala                        | 0                                       | 0                                       | 8                                       | 14                                      | 22                    |
| Guinea                           | 0                                       | 0                                       | 5                                       | 3                                       | 8                     |
| Guinea-Bissau                    | 0                                       | 0                                       | 6                                       | 3                                       | 9                     |
| Guyana                           | 0                                       | 0                                       | 0                                       | 10                                      | 10                    |
| Haiti                            | 0                                       | 0                                       | 2                                       | 8                                       | 10                    |
| Honduras                         | 0                                       | 0                                       | 3                                       | 15                                      | 18                    |
| India                            | 3                                       | 3                                       | 12                                      | 13                                      | 31                    |
| Indonesia                        | 2                                       | 3                                       | 13                                      | 16                                      | 34                    |

|                       |    |    |    |    |    |
|-----------------------|----|----|----|----|----|
| Iran                  | 0  | 0  | 1  | 30 | 31 |
| Iraq                  | 0  | 2  | 0  | 16 | 18 |
| Jamaica               | 0  | 0  | 0  | 14 | 14 |
| Jordan                | 0  | 0  | 0  | 12 | 12 |
| Kenya                 | 0  | 0  | 19 | 28 | 47 |
| Kyrgyzstan            | 0  | 0  | 5  | 4  | 9  |
| Laos                  | 0  | 7  | 0  | 11 | 18 |
| Lesotho               | 0  | 0  | 10 | 0  | 10 |
| Liberia               | 0  | 0  | 0  | 15 | 15 |
| Libya                 | 14 | 1  | 4  | 3  | 22 |
| Madagascar            | 0  | 3  | 0  | 3  | 6  |
| Malawi                | 0  | 0  | 3  | 0  | 3  |
| Malaysia              | 2  | 9  | 0  | 4  | 16 |
| Mali                  | 0  | 1  | 3  | 5  | 9  |
| Mauritania            | 0  | 1  | 8  | 4  | 13 |
| Mexico                | 0  | 0  | 6  | 26 | 32 |
| Mongolia              | 0  | 0  | 8  | 14 | 22 |
| Morocco               | 0  | 0  | 0  | 15 | 15 |
| Mozambique            | 0  | 0  | 0  | 11 | 11 |
| Myanmar               | 0  | 0  | 4  | 11 | 15 |
| Namibia               | 2  | 2  | 1  | 8  | 13 |
| Nepal                 | 0  | 0  | 0  | 5  | 5  |
| Nicaragua             | 0  | 1  | 4  | 13 | 18 |
| Niger                 | 1  | 1  | 0  | 6  | 8  |
| Nigeria               | 1  | 2  | 15 | 19 | 37 |
| Pakistan              | 5  | 0  | 0  | 2  | 7  |
| Palestine             | 0  | 0  | 1  | 1  | 2  |
| Panama                | 0  | 0  | 0  | 13 | 13 |
| Papua New Guinea      | 0  | 0  | 0  | 22 | 22 |
| Paraguay              | 2  | 0  | 0  | 16 | 18 |
| Peru                  | 0  | 0  | 14 | 12 | 26 |
| Philippines           | 0  | 0  | 0  | 81 | 82 |
| Republic of Congo     | 8  | 4  | 0  | 0  | 12 |
| Rwanda                | 0  | 0  | 0  | 5  | 5  |
| Senegal               | 2  | 0  | 12 | 0  | 14 |
| Sierra Leone          | 0  | 0  | 0  | 4  | 4  |
| Somalia               | 0  | 1  | 9  | 8  | 18 |
| South Africa          | 0  | 1  | 1  | 7  | 9  |
| South Sudan           | 0  | 0  | 0  | 10 | 10 |
| Sri Lanka             | 0  | 0  | 1  | 24 | 25 |
| Sudan                 | 0  | 0  | 9  | 9  | 18 |
| Suriname              | 0  | 0  | 1  | 9  | 10 |
| Swaziland             | 0  | 0  | 2  | 2  | 4  |
| Syria                 | 7  | 7  | 0  | 0  | 14 |
| São Tomé and Príncipe | 0  | 0  | 2  | 0  | 2  |
| Tajikistan            | 1  | 4  | 0  | 0  | 5  |
| Tanzania              | 0  | 2  | 1  | 27 | 30 |
| Thailand              | 4  | 62 | 0  | 11 | 77 |
| Timor-Leste           | 0  | 0  | 1  | 12 | 13 |
| Togo                  | 1  | 4  | 0  | 0  | 5  |

|                     |   |    |    |    |    |
|---------------------|---|----|----|----|----|
| Trinidad and Tobago | 0 | 0  | 0  | 13 | 15 |
| Tunisia             | 0 | 0  | 0  | 24 | 24 |
| Turkmenistan        | 0 | 0  | 2  | 4  | 6  |
| Uganda              | 0 | 2  | 0  | 56 | 58 |
| Uzbekistan          | 0 | 3  | 5  | 6  | 14 |
| Venezuela           | 5 | 11 | 1  | 7  | 25 |
| Vietnam             | 0 | 0  | 0  | 63 | 63 |
| Western Sahara      | 2 | 0  | 2  | 0  | 4  |
| Yemen               | 3 | 10 | 4  | 4  | 21 |
| Zambia              | 0 | 6  | 0  | 4  | 10 |
| Zimbabwe            | 0 | 0  | 10 | 0  | 10 |

**Supplementary Table 12: Change of overweight and wasting from 2000 to 2017 at the second administrative level in all LMICs.**

| Country                          | Wasting increased, Overweight decreased | Wasting increased, Overweight increased | Wasting decreased, overweight decreased | Wasting decreased, overweight increased | Total number of units |
|----------------------------------|-----------------------------------------|-----------------------------------------|-----------------------------------------|-----------------------------------------|-----------------------|
| Afghanistan                      | 3                                       | 9                                       | 182                                     | 134                                     | 328                   |
| Algeria                          | 0                                       | 0                                       | 102                                     | 1400                                    | 1504                  |
| Angola                           | 0                                       | 0                                       | 56                                      | 106                                     | 163                   |
| Bangladesh                       | 2                                       | 13                                      | 4                                       | 41                                      | 60                    |
| Belize                           | 0                                       | 0                                       | 2                                       | 4                                       | 6                     |
| Benin                            | 1                                       | 42                                      | 2                                       | 31                                      | 76                    |
| Bhutan                           | 1                                       | 63                                      | 27                                      | 114                                     | 205                   |
| Bolivia                          | 0                                       | 0                                       | 73                                      | 22                                      | 95                    |
| Botswana                         | 0                                       | 0                                       | 0                                       | 30                                      | 30                    |
| Brazil                           | 1                                       | 268                                     | 135                                     | 5096                                    | 5504                  |
| Burkina Faso                     | 0                                       | 0                                       | 1                                       | 44                                      | 45                    |
| Burundi                          | 0                                       | 8                                       | 21                                      | 104                                     | 133                   |
| Cambodia                         | 0                                       | 0                                       | 33                                      | 145                                     | 178                   |
| Cameroon                         | 0                                       | 0                                       | 38                                      | 20                                      | 58                    |
| Cape Verde                       | 0                                       | 0                                       | 0                                       | 22                                      | 22                    |
| Central African Republic         | 7                                       | 1                                       | 41                                      | 2                                       | 51                    |
| Chad                             | 7                                       | 13                                      | 14                                      | 21                                      | 55                    |
| China                            | 1                                       | 5                                       | 132                                     | 223                                     | 364                   |
| Colombia                         | 0                                       | 0                                       | 726                                     | 336                                     | 1065                  |
| Comoros                          | 0                                       | 0                                       | 3                                       | 0                                       | 3                     |
| Costa Rica                       | 0                                       | 0                                       | 0                                       | 81                                      | 81                    |
| Cuba                             | 0                                       | 0                                       | 0                                       | 167                                     | 168                   |
| Côte d'Ivoire                    | 0                                       | 0                                       | 27                                      | 6                                       | 33                    |
| Democratic Republic of the Congo | 0                                       | 5                                       | 72                                      | 162                                     | 239                   |
| Djibouti                         | 0                                       | 0                                       | 0                                       | 11                                      | 11                    |

|                    |     |     |     |      |      |
|--------------------|-----|-----|-----|------|------|
| Dominican Republic | 0   | 13  | 18  | 124  | 155  |
| Ecuador            | 0   | 0   | 8   | 215  | 223  |
| Egypt              | 29  | 91  | 83  | 134  | 343  |
| El Salvador        | 0   | 22  | 30  | 214  | 266  |
| Equatorial Guinea  | 0   | 0   | 0   | 29   | 32   |
| Eritrea            | 0   | 2   | 1   | 43   | 46   |
| Ethiopia           | 0   | 5   | 0   | 74   | 79   |
| French Guiana      | 0   | 0   | 0   | 0    | 378  |
| Gabon              | 0   | 6   | 3   | 28   | 37   |
| Gambia             | 1   | 14  | 9   | 12   | 37   |
| Ghana              | 0   | 0   | 43  | 94   | 137  |
| Guatemala          | 0   | 0   | 143 | 211  | 354  |
| Guinea             | 0   | 0   | 17  | 17   | 34   |
| Guinea-Bissau      | 0   | 1   | 26  | 10   | 37   |
| Guyana             | 0   | 0   | 0   | 111  | 116  |
| Haiti              | 0   | 0   | 6   | 35   | 41   |
| Honduras           | 0   | 0   | 39  | 259  | 298  |
| India              | 106 | 61  | 166 | 388  | 722  |
| Indonesia          | 40  | 44  | 176 | 240  | 502  |
| Iran               | 0   | 2   | 20  | 366  | 388  |
| Iraq               | 0   | 17  | 7   | 78   | 102  |
| Jamaica            | 0   | 0   | 0   | 14   | 14   |
| Jordan             | 0   | 2   | 1   | 49   | 52   |
| Kenya              | 0   | 2   | 127 | 169  | 299  |
| Kyrgyzstan         | 3   | 0   | 24  | 17   | 44   |
| Laos               | 0   | 56  | 0   | 86   | 142  |
| Lesotho            | 0   | 0   | 10  | 0    | 10   |
| Liberia            | 0   | 0   | 0   | 66   | 66   |
| Libya              | 14  | 1   | 4   | 3    | 22   |
| Madagascar         | 1   | 6   | 0   | 15   | 22   |
| Malawi             | 0   | 0   | 24  | 4    | 28   |
| Malaysia           | 7   | 105 | 0   | 31   | 144  |
| Mali               | 0   | 3   | 17  | 30   | 50   |
| Mauritania         | 2   | 1   | 29  | 12   | 44   |
| Mexico             | 0   | 0   | 353 | 2101 | 2454 |
| Mongolia           | 1   | 1   | 128 | 197  | 327  |
| Morocco            | 0   | 0   | 1   | 53   | 54   |
| Mozambique         | 0   | 0   | 11  | 118  | 129  |
| Myanmar            | 0   | 0   | 15  | 48   | 63   |
| Namibia            | 7   | 31  | 5   | 64   | 107  |
| Nepal              | 0   | 0   | 0   | 14   | 14   |

|                       |    |     |     |      |      |
|-----------------------|----|-----|-----|------|------|
| Nicaragua             | 0  | 19  | 23  | 97   | 139  |
| Niger                 | 7  | 3   | 0   | 26   | 36   |
| Nigeria               | 26 | 37  | 330 | 382  | 775  |
| Pakistan              | 19 | 8   | 2   | 3    | 32   |
| Palestine             | 0  | 0   | 5   | 11   | 16   |
| Panama                | 0  | 0   | 7   | 72   | 79   |
| Papua New Guinea      | 0  | 0   | 0   | 87   | 87   |
| Paraguay              | 13 | 0   | 4   | 201  | 218  |
| Peru                  | 0  | 0   | 97  | 98   | 195  |
| Philippines           | 0  | 27  | 37  | 1562 | 1647 |
| Republic of Congo     | 37 | 10  | 1   | 0    | 48   |
| Rwanda                | 0  | 0   | 0   | 30   | 30   |
| Senegal               | 7  | 1   | 33  | 4    | 45   |
| Sierra Leone          | 0  | 0   | 0   | 14   | 14   |
| Somalia               | 2  | 2   | 32  | 38   | 74   |
| South Africa          | 0  | 3   | 10  | 39   | 52   |
| South Sudan           | 0  | 0   | 0   | 45   | 45   |
| Sri Lanka             | 0  | 0   | 7   | 315  | 323  |
| Sudan                 | 1  | 0   | 32  | 47   | 80   |
| Suriname              | 0  | 0   | 2   | 60   | 62   |
| Swaziland             | 0  | 0   | 29  | 26   | 55   |
| Syria                 | 30 | 30  | 0   | 0    | 60   |
| São Tomé and Príncipe | 0  | 0   | 6   | 0    | 7    |
| Tajikistan            | 31 | 23  | 0   | 5    | 59   |
| Tanzania              | 1  | 17  | 6   | 158  | 183  |
| Thailand              | 32 | 776 | 0   | 120  | 928  |
| Timor-Leste           | 0  | 0   | 4   | 58   | 62   |
| Togo                  | 5  | 13  | 0   | 3    | 21   |
| Trinidad and Tobago   | 0  | 0   | 0   | 13   | 15   |
| Tunisia               | 0  | 0   | 5   | 256  | 268  |
| Turkmenistan          | 0  | 0   | 2   | 4    | 6    |
| Uganda                | 1  | 3   | 0   | 79   | 83   |
| Uzbekistan            | 8  | 30  | 56  | 67   | 161  |
| Venezuela             | 87 | 159 | 23  | 65   | 338  |
| Vietnam               | 0  | 0   | 9   | 698  | 710  |
| Western Sahara        | 2  | 0   | 2   | 0    | 4    |
| Yemen                 | 44 | 147 | 95  | 43   | 333  |
| Zambia                | 0  | 35  | 0   | 37   | 72   |
| Zimbabwe              | 0  | 0   | 59  | 1    | 60   |

130 **4.0 Model Validation**

4.1 Overweight validation metrics

**Supplementary Table 13: Predictive metrics for overweight aggregated to admin 0.**

The out-of-sample (OOS) column indicates whether the metric was calculated using in-sample or out-of-sample predictions. The models included 420 geo-referenced household surveys representing over 3 million under-5 children. Pearson correlation method was used to compute correlation values.

135

| Year | OOS   | Median SS | Mean Err. | RMSE  | Corr. | 95% Cov. |
|------|-------|-----------|-----------|-------|-------|----------|
| 2000 | FALSE | 1798.500  | -0.013    | 0.036 | 0.918 | 0.942    |
| 2005 | FALSE | 2022.000  | -0.003    | 0.022 | 0.950 | 0.902    |
| 2010 | FALSE | 3177.339  | -0.006    | 0.018 | 0.969 | 0.923    |
| 2015 | FALSE | 2387.885  | -0.015    | 0.021 | 0.971 | 0.958    |
| 2000 | TRUE  | 1798.500  | -0.003    | 0.033 | 0.903 | 0.906    |
| 2005 | TRUE  | 2022.000  | 0.000     | 0.021 | 0.944 | 0.889    |
| 2010 | TRUE  | 3177.339  | -0.003    | 0.019 | 0.964 | 0.912    |
| 2015 | TRUE  | 2387.885  | -0.015    | 0.021 | 0.956 | 0.952    |

**Supplementary Table 14: Predictive metrics for overweight aggregated to admin 1.**

The out-of-sample (OOS) column indicates whether the metric was calculated using in-sample or out-of-sample predictions. The models included 420 geo-referenced household surveys representing over 3 million under-5 children. Pearson correlation method was used to compute correlation values.

140

| Year | OOS   | Median SS | Mean Err. | RMSE  | Corr. | 95% Cov. |
|------|-------|-----------|-----------|-------|-------|----------|
| 2000 | FALSE | 211.609   | 0.001     | 0.041 | 0.936 | 0.977    |
| 2005 | FALSE | 308.102   | -0.015    | 0.041 | 0.941 | 0.942    |
| 2010 | FALSE | 337.062   | -0.014    | 0.046 | 0.923 | 0.940    |
| 2015 | FALSE | 377.000   | -0.020    | 0.045 | 0.926 | 0.955    |
| 2000 | TRUE  | 211.609   | -0.003    | 0.057 | 0.881 | 0.965    |
| 2005 | TRUE  | 308.102   | -0.019    | 0.052 | 0.906 | 0.931    |
| 2010 | TRUE  | 337.062   | -0.020    | 0.057 | 0.885 | 0.922    |
| 2015 | TRUE  | 377.000   | -0.023    | 0.051 | 0.902 | 0.947    |

**Supplementary Table 15: Predictive metrics for overweight aggregated to admin 2.**

The out-of-sample (OOS) column indicates whether the metric was calculated using in-sample or out-of-sample predictions. The models included 420 geo-referenced household surveys representing over 3 million under-5 children. Pearson correlation method was used to compute correlation values.

145

| Year | OOS   | Median SS | Mean Err. | RMSE  | Corr. | 95% Cov. |
|------|-------|-----------|-----------|-------|-------|----------|
| 2000 | FALSE | 27.693    | 0.001     | 0.055 | 0.897 | 0.977    |
| 2005 | FALSE | 33.059    | -0.015    | 0.059 | 0.885 | 0.941    |

|             |       |        |        |       |       |       |
|-------------|-------|--------|--------|-------|-------|-------|
| <b>2010</b> | FALSE | 41.054 | -0.014 | 0.067 | 0.861 | 0.940 |
| <b>2015</b> | FALSE | 36.000 | -0.020 | 0.074 | 0.827 | 0.954 |
| <b>2000</b> | TRUE  | 27.693 | -0.003 | 0.071 | 0.828 | 0.964 |
| <b>2005</b> | TRUE  | 33.059 | -0.019 | 0.072 | 0.834 | 0.931 |
| <b>2010</b> | TRUE  | 41.054 | -0.020 | 0.080 | 0.801 | 0.922 |
| <b>2015</b> | TRUE  | 36.000 | -0.023 | 0.083 | 0.776 | 0.947 |

#### 4.2 Wasting validation metrics

##### Supplementary Table 16: Predictive metrics for wasting aggregated to admin 0.

150 The out-of-sample (OOS) column indicates whether the metric was calculated using in-sample or out-of-sample predictions. The models included 420 geo-referenced household surveys representing over 3 million under-5 children. Pearson correlation method was used to compute correlation values.

| <b>Year</b> | <b>OOS</b> | <b>Median SS</b> | <b>Mean Err.</b> | <b>RMSE</b> | <b>Corr.</b> | <b>95% Cov.</b> |
|-------------|------------|------------------|------------------|-------------|--------------|-----------------|
| <b>2000</b> | FALSE      | 1775.442         | -0.002           | 0.009       | 0.989        | 0.982           |
| <b>2005</b> | FALSE      | 2022.000         | 0.000            | 0.013       | 0.983        | 0.938           |
| <b>2010</b> | FALSE      | 3180.421         | -0.003           | 0.011       | 0.980        | 0.967           |
| <b>2015</b> | FALSE      | 2409.500         | -0.001           | 0.009       | 0.990        | 0.973           |
| <b>2000</b> | TRUE       | 1775.442         | -0.003           | 0.028       | 0.862        | 0.941           |
| <b>2005</b> | TRUE       | 2022.000         | -0.008           | 0.026       | 0.948        | 0.908           |
| <b>2010</b> | TRUE       | 3180.421         | -0.011           | 0.028       | 0.898        | 0.926           |
| <b>2015</b> | TRUE       | 2409.500         | 0.001            | 0.023       | 0.919        | 0.959           |

##### Supplementary Table 17: Predictive metrics for wasting aggregated to admin 1.

155 The out-of-sample (OOS) column indicates whether the metric was calculated using in-sample or out-of-sample predictions. The models included 420 geo-referenced household surveys representing over 3 million under-5 children. Pearson correlation method was used to compute correlation values.

| <b>Year</b> | <b>OOS</b> | <b>Median SS</b> | <b>Mean Err.</b> | <b>RMSE</b> | <b>Corr.</b> | <b>95% Cov.</b> |
|-------------|------------|------------------|------------------|-------------|--------------|-----------------|
| <b>2000</b> | FALSE      | 96.000           | -0.002           | 0.028       | 0.905        | 0.982           |
| <b>2005</b> | FALSE      | 134.000          | 0.000            | 0.029       | 0.934        | 0.939           |
| <b>2010</b> | FALSE      | 146.579          | -0.003           | 0.030       | 0.902        | 0.966           |
| <b>2015</b> | FALSE      | 181.000          | -0.001           | 0.033       | 0.913        | 0.973           |
| <b>2000</b> | TRUE       | 96.000           | -0.002           | 0.046       | 0.735        | 0.937           |
| <b>2005</b> | TRUE       | 134.000          | -0.008           | 0.043       | 0.873        | 0.908           |
| <b>2010</b> | TRUE       | 146.579          | -0.011           | 0.043       | 0.803        | 0.924           |
| <b>2015</b> | TRUE       | 181.000          | 0.001            | 0.052       | 0.749        | 0.960           |

##### Supplementary Table 18: Predictive metrics for wasting aggregated to admin 2.

160 The out-of-sample (OOS) column indicates whether the metric was calculated using in-sample or out-of-  
 sample predictions. The models included 420 geo-referenced household surveys representing over 3  
 million under-5 children. Pearson correlation method was used to compute correlation values.

| Year | OOS   | Median<br>SS | Mean<br>Err. | RMSE  | Corr. | 95% Cov. |
|------|-------|--------------|--------------|-------|-------|----------|
| 2000 | FALSE | 12.000       | -0.002       | 0.042 | 0.817 | 0.982    |
| 2005 | FALSE | 14.047       | 0.000        | 0.048 | 0.851 | 0.938    |
| 2010 | FALSE | 17.453       | -0.003       | 0.052 | 0.774 | 0.965    |
| 2015 | FALSE | 16.000       | -0.001       | 0.065 | 0.747 | 0.973    |
| 2000 | TRUE  | 12.000       | -0.002       | 0.059 | 0.636 | 0.936    |
| 2005 | TRUE  | 14.047       | -0.008       | 0.060 | 0.777 | 0.907    |
| 2010 | TRUE  | 17.447       | -0.011       | 0.062 | 0.674 | 0.924    |
| 2015 | TRUE  | 16.000       | 0.001        | 0.078 | 0.599 | 0.959    |

## 5.0 Supplementary References

165

1. Stevens, G. A. *et al.* Guidelines for Accurate and Transparent Health Estimates Reporting: the GATHER statement. *PLOS Med.* **13**, e1002056 (2016).
2. Dicker, D. *et al.* Global, regional, and national age-sex-specific mortality and life expectancy, 1950–2017: a systematic analysis for the Global Burden of Disease Study 2017. *Lancet* **392**, 1684–1735 (2018).

170

## 6.0 Author Contributions

175

### [Managing the estimation or publications process](#)

Damaris K Kinyoki, Sandra B Munro, Laurie B Marczak, Megan F Schipp, Ashkan Afshin, and Simon I Hay

### [Writing the first draft of the manuscript](#)

Damaris K Kinyoki, Jennifer M Ross, Sandra B Munro, Lauren E Schaeffer, Megan F Schipp, Ashkan Afshin, and Simon I Hay

180

### [Primary responsibility for this manuscript focused on: applying analytical methods to produce estimates](#)

Damaris K Kinyoki, Aaron E Osgood-Zimmerman, Jonathan F Mosser, Aniruddha Deshpande

185

### [Primary responsibility for this manuscript focused on: seeking, cataloguing, extracting, or cleaning data; designing or coding figures and tables](#)

Damaris K Kinyoki, Alice Lazzar-Atwood, Brandon V Pickering, Ian D Letourneau

190 [Providing data or critical feedback on data sources](#)

- Hedayat Abbastabar, Ahmed Abdelalim, Amir Abdoli, Kanaan Abdullah, Hassan Abolhassani, Michael RM Abrigo, Manfred Accrombessi, Maryam Adabi, Daniel Adane, Akindele Adebiji, Isaac Adedeji, Victor Adekanmbi, Olatunji Adetokunboh, Davoud Adham, Shailesh Advani, Mohsen Afarideh, Mohammad Aghaali, Tauseef Ahmad, Muktar Ahmed, Turki Alanzi,
- 195 Jacqueline E Alcalde-Rabanal, Niguse Alema, Muhammad Ali, Beriwan Ali, Beriwan Ali, Saqib Ali, Cyrus Alinia, Vahid Alipour, Hesam Alizade, Syed Aljunid, Amir Almasi-Hashiani, Nelson Alvis-Guzman, Nelson J Alvis-Zakzuk, Azmeraw T Amare, Saeed Amini, Nahla Anber, Fereshteh Ansari, Carl Abelardo Antonio, Davood Anvari, Razique Anwer, Jalal Arabloo, Zohreh Arefi, Olatunde Aremu, Samaneh Asgari, Ashish Awasthi, Beatriz Paulina Ayala Quintanilla, Samad Azari,
- 200 Ghasem Azarian, Ashish Badiye, Mohammad Amin Bahrami, Senthilkumar Balakrishnan, Maciej Banach, Palash Chandra Banik, Miguel A Barboza, Till Bärnighausen, Sanjay Basu, Dereje Bayissa, Kidanemariam Berhe, Adam Berman, Ali Bijani, Boris Bikbov, Minyichil Birhanu, Somayeh Bohlouli, Mahdi Bohluli, Srinivasa Bolla, Nicola Luigi Bragazzi, Nikolay Briko, Alessandra C Goulart, Juan J Carrero, Deborah Carvalho Malta, Carlos Castañeda-Orjuela, Franz
- 205 Castro, Vijay Kumar Chattu, Bal Govind Chauhan, Bal Govind Chauhan, Dinh Toi Chu, Abel Dadi, Giovanni Damiani, Aso Darweesh, Amira Hamed Darwish, Ahmad Daryani, Desta Debalkie Atnafu, Asmamaw Demis, Dereje Demissie, Gebre Demoz, Nebiyu Dereje, Kebede Deribe, Rupak Desai, Assefa Desalew, Preeti Dhillon, Meghnath Dhimal, Govinda Dhungana, Mostafa Dianatinasab, Girmaye Dinsa, Hoa Do Thi, Manisha Dubey, Bereket Duko, Susanna Dunachie,
- 210 Aziz Eftekhari, Iman El Sayed, Varavikova Elena, Ziad El-Khatib, Iqbal Elyazar, Mohammad Hassan Emamian, Shymaa Enany, Tewodros Eshete, Khalil Eskandari, Saman Esmaeilnejad, Alireza Esteghamati, Atkilt Esaiyas Etisso, Anwar Faraj, Sajjad Farashi, Mohammad Fareed, Andrea Farioli, Andre Faro, Farshad Farzadfar, Nelsensius Klau Fauk, Seyed-Mohammad Fereshtehnejad, Joao Fernandes, Irina Filip, Carsten Flohr, Nataliya Foigt, Morenike Folayan,
- 215 Artem Fomenkov, Artem Fomenkov, Takeshi Fukumoto, Ketema Bizuwork Gebremedhin, Gebretsadkan Gebretsadik, Getnet Gedefaw, Hailay Gesesew, Mansour Ghafourifard, Mansour Ghafourifard, Alireza Ghajar, Ahmad Ghashghaee, Ibrahim Ginawi, Yordanos Gizachew, Srinivas Goli, Nelson Gomes, Ayman Grada, Michal Grivna, Rajat Das Gupta, Nima Hafezi-Nejad, Michael Tamene Haile, Arvin Haj-Mirzaian, Arya Haj-Mirzaian, Hamidreza Haririan, Ninuk Hariyani, Edris Hasanpoor, Amir Hasanzadeh, Amir Hasanzadeh, Soheil Hassanipour, Hamid Y Hassen, Reza Heidari-Soureshjani, Nathaniel Henry, Mario Herrero, Hagos Hidru, Chi Hoang Linh, Hans Hoek, Praveen Hoogar, Mehdi Hosseinzadeh, Mohamed Hsairi, Guoqing Hu, Segun Emmanuel Ibitoye, Usman Iqbal, Sheikh Mohammed Shariful Islam, Nader Jafaribalalami, Morteza Jafarinia, Mihajlo Jakovljevic, Ahamarshan Jayaraman Nagarajan, Achala Jayatilleke, Panniyammakal
- 225 Jeemon, John Ji, Peng Jia, Yetunde O John-Akinola, Kimberly Johnson, Jost B Jonas, Farahnaz Joukar, Jacek Jozwiak, Mikko Jürisson, Molla Kahssay, Leila R Kalankesh, Rohollah Kalhor, Tanuj Kanchan, Umesh Kapil, umesh kapil, Neeti Kapoor, Manoochehr Karami, André Karch, Surendra Karki, Amir Kasaeian, Habtamu Kasaye, Habtamu Kasaye, Hagazi Kassaye, Nicholas Kassebaum, Yousef Khader, Morteza Abdullatif Khafaie, Nauman Khalid, Ibrahim Khalil, Rovshan Khalilov,
- 230 Md Nuruzzaman Khan, Muhammad Shahzeb Khan, Khaled Khatab, Amir khater, Milad Khorasani, Daniel Kiirithio, Yun Jin Kim, Young-Eun Kim, Adnan Kisa, Sezer Kisa, Hamidreza Komaki, Parvaiz Koul, Kewal Krishan, Kris Krohn, Pushpendra Kumar, Dharmesh Lal, Huong Lan

235 Nguyen, Savita Lasrado, Mostafa Leili, Chi Linh Hoang, Shiwei Liu, Joshua Longbottom, Jaifred Christian Lopez, Dhaval Maghavani, Narayan Mahotra, Navid Manafi, Ali Manafi, Farzad Manafi, Fariborz Mansour-Ghanaei, Borhan Mansouri, Mohammad Ali Mansournia, Francisco Rogerlândio Martins-Melo, Benjamin Mayala, Mohsen Mazidi, Man Mohan Mehndiratta, Fereshteh Mehri, Hagazi Gebre Meles, Addisu Melese, Walter Mendoza, Ritesh G Menezes, Tuomo Meretoja, Ted R Miller, Biniam Minuye, Hamed Mirjalali, Erkin Mirrakhimov, Prasanna Mithra, Babak Moazen, Amjad Mohamadi Bolbanabad, Karzan Mohammad, Karzan  
 240 Mohammad, Shadieh Mohammadi, Reza Mohammadpourhodki, Shafiu Mohammed, Ammas Mohammed, Farnam Mohebi, Ali Mokdad, Yoshan Moodley, Maryam Moossavi, Masoud Moradi, Ghobad Moradi, Mohammad Moradi-Joo, Maziar Moradi-Lakeh, Abbas Mosapour, Simin Mouodi, Amin Mousavi Khaneghah, Ulrich Mueller, Kamarul Imran Musa, Ghulam Mustafa, Saravanan Muthupandian, Girish Nadkarni, Mohsen Naghavi, Seyed Sina Naghibi  
 245 Irvani, Vinod C Nayak, Ionut Negoii, Ruxandra Irina Negoii, Josephine Ngunjiri, Dabere Nigatu, Yeshambel Nigatu, Rajan Nikbakhsh, Chukwudi Nnaji, Jean Jacques Noubiap, Christoph Nowak, Olanrewaju Oladimeji, Andrew T Olagunju, Tinuke O Olagunju, Bolajoko Olusanya, Jacob Olusanya, Ahmed Omar Bali, Obinna Onwujekwe, Alberto Ortiz, Mayowa Owolabi, Mahesh P A, Keyvan Pakshir, Songhomitra Panda-Jonas, Sangram Kishor Patel, Mona Pathak, Ajay Patle,  
 250 Hamidreza Pazoki-Toroudi, Veincent Christian Pepito, William Petri, Huyen Phuc Do, David Pigott, Bakhtiar Piroozi, Maarten Postma, Hadi Pourjafar, Akram Pourshams, Hossein Poustchi, Sergio Prada, Dimas Ria Angga Pribadi, Amir Radfar, Alireza Rafiei, Fakher Rahim, Vafa Rahimi-Movaghar, Sajjad Rahman, Ali Rajabpour-Sanati, Kiana Ramezanzadeh, Saleem Rana, Chhabi Lal Ranabhat, Priya Rathi, Salman Rawaf, David Rawaf, Lal Rawal, Reza Rawassizadeh, Vishnu  
 255 Renjith, Andre Renzaho, Bhageerathy Reshmi, Nima Rezaei, Ana Isabel Ribeiro, Leonardo Roever, Gholamreza Roshandel, Ali Rostami, Sadegh Rostamnia, Enrico Rubagotti, Seyedmohammad Saadatagah, Ehsan Sadeghi, Yahya Safari, Hamid Safarpour, S Mohammad Sajadi, Mohammad Reza Salahshoor, Nasir Salam, Marwa Salem, Hosni Salem, Evanson Z Sambala, Abdallah M Samy, Bruno Sao Jose, Sivan Saraswathy, Abdur Razzaque Sarker, Benn  
 260 Sartorius, Arash Sarveazad, Brijesh Sathian, Maheswar Satpathy, David C Schwebel, Seyedmojtaba Seyedmousavi, Famarz Shaahmadi, Masood Ali Shaikh, Morteza Shamsizadeh, Mohd Shannawaz, Mehdi Sharif, Wondimeneh Shiferaw, Rahman Shiri, Soraya Siabani, Tariq Jamal Siddiqi, Jasvinder Singh, Virendra Singh, Amin Soheili, Farzaneh Soltani, JB Soriano, Sergey Soshnikov, Chandrashekhar T Sreeramareddy, Antonina Starodubova, Antonina Starodubova,  
 265 Agus Sudaryanto, Hafiz Ansar Rasul Suleria, Bryan L Sykes, Rafael Tabarés-Seisdedos, Birkneh Tilahun Tadesse, Amir Taherkhani, Cuong Tat Nguyen, Nuno Taveira, Girmay Teklay, Michael Temene, Maria Titova, Maria Titova, Marcos Roberto Tovani-Palone, Eugenio Traini, Bach Tran, Reta Tsegaye, Irfan Ullah, Bhaskaran Unnikrishnan, Era Upadhyay, Ushotanefe Useh, Muhammad Shariq Usman, Olalekan Uthman, Masoud Vaezghasemi, John VanderHeide, Tommi  
 270 Vasankari, Yasser Vasseghian, Srinivasaraghavan Venkatesh, Narayanaswamy Venketasubramanian, Madhur Verma, Vasiliy Vlassov, Rade Vukovic, Yasir Waheed, Taweewat Wiangkham, Tissa Wijeratne, Haileab Fekadu Wolde, Dawit Zewdu Wondafrash, Gelin Xu, Abbas Yadegar, Ali Yadollahpour, Tomohide Yamada, Sanni Yaya, Alex Yeshaneh, Mekdes Yilma, Mekdes Yilma, Tesfaye Yitna, Naohiro Yonemoto, Seok-Jun Yoon, Zabihollah Yousefi, Chuanhua  
 275 Yu, Mohammad Zamani, Hadi Zarafshan, Nejimu Zepro, Xiu-Ju Zhao, Arash Ziapour

### Development of methods or computational machinery

Kanaan Abdullah, Isaac Adedeji, Davoud Adham, Muktar Ahmed, Saqib Ali, Hesam Alizade, Nahla Anber, Fereshteh Ansari, Zahra Bagheri-Hosseiniabadi, Masoud Behzadifar, Meysam Behzadifar, Mahdi Bohluli, Michael Collison, Michael Cork, Giovanni Damiani, Aso Darweesh, Lucas Earl, Aziz Eftekhari, Anwar Faraj, Ali Akbar Fazaeli, Carsten Flohr, Rajat Das Gupta, Yadollah Hamidi, Amir Hasanzadeh, Nathaniel Henry, Mario Herrero, Mehdi Hosseinzadeh, Morteza Jafarinia, Jacek Jozwiak, Nicholas Kassebaum, Rovshan Khalilov, Mohammad Taghi Khodayari, Mohammad Hossein Khosravi, Adnan Kisa, Sezer Kisa, Kris Krohn, Georgy Lebedev, Jaifred Christian Lopez, Navid Manafi, Ali Manafi, Farzad Manafi, Borhan Mansouri, Dadi Marami, Mohsen Mazidi, Shadieh Mohammadi, Reza Mohammadpourhodki, Ali Mokdad, Masoud Moradi, Rahmatollah Moradzadeh, Jonathan Mosser, Zelalem Nigussie, Bogdan Oancea, Ahmed Omar Bali, Aaron Osgood-Zimmerman, David Pigott, Hadi Pourjafar, Dimas Ria Angga Pribadi, Ali Rajabpour-Sanati, Chhabi Lal Ranabhat, Priya Rathi, Reza Rawassizadeh, Vishnu Renjith, Seyed Mohammad Riahi, Yahya Safari, Abdallah M Samy, Maheswar Satpathy, Alyssa Sbarra, Faramarz Shaahmadi, Farzaneh Soltani, Mojtaba Soltani, John VanderHeide, Yasser Vasseghian, Sanni Yaya, Vahid Yazdi-Feyzabadi, Maryam Zamanian, Mojtaba Ziaee, Arash Ziapour

295

### Providing critical feedback on methods or results

Jennifer Ross, Sandra Munro, Lauren Schaeffer, Masoumeh Abbasi, Hedayat Abbastabar, Ahmed Abdelalim, Mohammad Abdollahi, Ibrahim Abdollahpour, Kanaan Abdullah, Teshome Abuka Abebo, Lucas Guimarães Abreu, Michael RM Abrigo, Anemaw Asrat Achamyeh, Dilaram Acharya, Maryam Adabi, Isaac Adedeji, Victor Adekanmbi, Abiodun Adeoye, Olatunji Adetokunboh, Davoud Adham, Pana Adrian, Posi Aduroja, Shailesh Advani, Mohsen Afarideh, Mohammad Aghaali, Anurag Agrawal, Tauseef Ahmad, Keivan Ahmadi, Sepideh Ahmadi, Muktar Ahmed, Olufemi Ajumobi, Temesgen Yihunie Akalu, Tomi Akinyemiju, Ziyad Al-Aly, Genet Melak Alamene, Jacqueline E Alcalde-Rabanal, Muktar Ali, Saqib Ali, Mehran Alijanzadeh, Cyrus Alinia, Vahid Alipour, Hesam Alizade, Syed Aljunid, Afshin Almasi, Amir Almasi-Hashiani, Hesham Al-Mekhlafi, Rajaa Al-Raddadi, Khalid Altirkawi, Nelson Alvis-Guzman, Nelson J Alvis-Zakzuk, Azmeraw T Amare, Saeed Amini, Mostafa Amini-Rarani, Arianna Maeveer Amit, Nahla Anber, Robert Ancuceanu, Catalina Liliana Andrei, Fereshteh Ansari, Alireza Ansari-Moghaddam, Zelalem Alamrew Anteneh, Ernoiz Antriyandarti, Davood Anvari, Razique Anwer, Seth Christopher Yaw Appiah, Jalal Arabloo, Morteza Arab-Zozani, Ephrem Mebrahtu Araya, Zohreh Arefi, Olatunde Aremu, Johan Ärnlov, Ali Asadi-Pooya, Bahar Ataeinia, Hagos Tasrw Atalay, Marcel Ausloos, Euripide Avokpaho, Ashish Awasthi, Beatriz Paulina Ayala Quintanilla, Assefa Ayalew, Martin Ayanore, Yared Aynalem, Samad Azari, Ebrahim Babae, Alaa Badawi, Ashish Badiye, Zahra Bagheri-Hosseiniabadi, Ahad Bakhtiari, Senthilkumar Balakrishnan, Maciej Banach, Agegnehu Bante, Adhanom Gebreegziabher Baraki, Till Bärnighausen, Lingkan Barua, Sanjay Basu, Mohsen Bayati, Mulat Bayih, Dereje Bayissa, Habtamu Wondifraw Baynes, Neeraj Bedi, Meysam Behzadifar, Yibeltal Alemu Bekele, Derrick Bennett, Kidanemariam Berhe, Adam Berman, Robert Bernstein, Pankaj Bhardwaj, Kritika Bhattacharyya, Boris Bikbov, Ver Bilano, Muhammad Shahdaat Bin Sayeed, Antonio Biondi, Setognal Birara, Raaj Kishore Biswas, Zebeay Workneh Bitew, Tone Bjørge, Kassawmar Angaw Bogale, Somayeh Bohlouli, Mahdi

Bohluli, Archith Bolor, Shiva Borzouei, Oliver Brady, Nicola Luigi Bragazzi, Gabrielle Britton, Zahid Butt, Luis Alberto Camera, Luis Cámera, Ismael Campos-Nonato, Jorge Cano, Rosario Cárdenas, Félix Carvalho, Deborah Carvalho Malta, João Mauricio Castaldelli-Maia, Carlos Castañeda-Orjuela, Franz Castro, Ester Cerin, Collins Chansa, Jaykaran Charan, Pranab Chatterjee, Vijay Kumar Chattu, Bal Govind Chauhan, Bal Govind Chauhan, Ali Reza Chavshin, Mohammad Chehrazi, Ken Chin, Yilma Chisha, Devasahayam Christopher, Dinh Toi Chu, Flavia Cicuttini, Michael Collison, Michael Cork, Paolo Angelo Cortesi, Vera M Costa, Ewerton Cousin, Elizabeth Cromwell, Baye Dagnew, Saad Dahlawi, Giovanni Damiani, Aso Darweesh, Amira Hamed Darwish, Ahmad Daryani, Jai Das, Claudio Davila, Nicole Davis Weaver, Diego De Leo, Jan-Walter De Neve, Desta Debalkie Atnafu, Asmamaw Demis, Dereje Demissie, Nebiyu Dereje, Kebede Deribe, Rupak Desai, Beruk Desalegn, Sagnik Dey, Preeti Dhillon, Meghnath Dhimal, Govinda Dhungana, Mostafa Dianatinasab, Daniel Diaz, Zahra Sadat Dibaji Forooshani, Girmaye Dinsa, Isaac Oluwafemi Dipeolu, Shirin Djalalinia, Hoa Do Thi, Fariba Dorostkar, Leila Doshmangir, Manisha Dubey, Bereket Duko, Bruce Duncan, Andre Duraes, Lucas Earl, Hamed Ebrahimzadeh Leylabadlo, Aziz Eftekhari, Iman El Sayed, Maysaa El Sayed Zaki, Maha El Tantawi, Demelash Elemineh, Varavikova Elena, Shaimaa El-Jaafary, Ziad El-Khatib, Mohammad Hassan Emamian, Tewodros Eshete, Khalil Eskandari, Sharareh Eskandarieh, Saman Esmaeilnejad, Arash Etemadi, Jessica Fanzo, Mohammad Farahmand, Anwar Faraj, Mohammad Fareed, Roghiyeh Faridnia, Mithila Faruque, Farshad Farzadfar, Hossein Farzam, Alebachew Fasil, Nazir Fattahi, Netsanet Fentahun, Seyed-Mohammad Fereshtehnejad, Joao Fernandes, Eduarda Fernandes, Garumma Tolu Feyissa, Irina Filip, Florian Fischer, Carsten Flohr, Nataliya Foigt, Morenike Folayan, Masoud Foroutan, Jana Förster, Joel Francis, Berhane Fseha, Takeshi Fukumoto, Tsegaye Gebrehiwot, Kidane Tadesse Gebremariam, Hadush Gebremariam, Ketema Bizuwork Gebremedhin, Gebrekiros Gebremichael, Gebretsadkan Gebretsadik, Ayele Geleto, Chalachew Genet, Hailay Gesesew, Kebede Embaye Gezae, Mansour Ghafourifard, Mansour Ghafourifard, Alireza Ghajar, Mahsa Ghajarzadeh, Ahmad Ghashghae, Fariba Ghassemi, Hesam Ghasvand, Asadollah Gholamian, Syed Amir Gilani, Srinivas Goli, Nelson Gomes, Sameer Gopalani, Houman Goudarzi, Ayman Grada, Michal Grivna, Rashid A Guled, Yuming Guo, Rajat Das Gupta, Rajeev Gupta, Rahul Gupta, Desta Haftu, Michael Tamene Haile, Arvin Haj-Mirzaian, Arya Haj-Mirzaian, Brian Hall, Iman Halvaei, Randah Hamadeh, Demelash Woldeyohannes Handiso, Ninuk Hariyani, Md Mehedi Hasan, Milad Hasankhani, Edris Hasanpoor, Amir Hasanzadeh, Amir Hasanzadeh, Soheil Hassanipour, Hamid Y Hassen, Corinna Hawkes, Khezar Hayat, Behnam Heidari, Delia Hendrie, Nathaniel Henry, Mario Herrero, Claudiu Herteliu, Fatemeh Heydarpour, Hagos Hidru, Chi Hoang Linh, Michael Hole, Enayatollah Homaie Rad, Sung Hwi Hong, Praveen Hoogar, Masako Horino, Naznin Hossain, Seyyed Nasrollah Hosseini, Mehdi Hosseinzadeh, Guoqing Hu, Tanvir Huda, Ayesha Humayun, Segun Emmanuel Ibitoye, Abdelrahman Ibrahim Abushouk, Olayinka Ilesanmi, Milena Ilic, Usman Iqbal, Sheikh Mohammed Shariful Islam, Chidozie Iwu, Jalil Jaafari, Anelisa Jaca, Farhad Jadidi-Niaragh, Nader Jafaribalalami, Morteza Jafarinia, Mohammad Ali Jahani, Mihajlo Jakovljevic, Amir Jalali, Farzad Jalilian, Farzad Jalilian, Ahamarshan Jayaraman Nagarajan, Panniyammakal Jeemon, Fyezah Jehan, Ensiyeh Jenabi, Ravi Prakash Jha, John Ji, Peng Jia, Oommen John, Yetunde O John-Akinola, Jost B Jonas, Nitin Joseph, Farahnaz Joukar, Jacek Jozwiak, Chinwe Juliana, Suresh Jungari, Mikk Jürisson, Zubair Kabir, Hossein Samadi Kafil, Amaha Kahsay, Molla Kahssay, Hamed Kalani, Leila R Kalankesh, Rohollah Kalhor, Tanuj Kanchan, Rajni Kant, Neeti Kapoor,

365 Manoochehr Karami, Behzad Karami Matin, Surendra Karki, Amir Kasaeian, Gebremicheal Gebreslassie Kasahun, Habtamu Kasaye, Habtamu Kasaye, Tesfaye Kassa, Nicholas Kassebaum, Ali Kazemi Karyani, Andre P Kengne, Daniel Ketema, Yousef Khader, Morteza Abdullatif Khafaie, Mojtaba Khaksarian, Nauman Khalid, Ibrahim Khalil, Rovshan Khalilov, Ejaz Khan, Asaduzzaman Khan, Muhammad Shahzeb Khan, Khaled Khatab, Mona Khater, Maryam Khayamzadeh,

370 Maryam Khazaee-Pool, Salman Khzaei, Mohammad Hossein Khosravi, Roba Khundkar, Ali Kiadaliri, Neda Kianipour, Daniel Kiirithio, Yun Jin Kim, Young-Eun Kim, Ruth Kimokoti, Adnan Kisa, Sezer Kisa, Tufa Kolola, Hamidreza Komaki, Ali Koolivand, Ai Koyanagi, Kewal Krishan, Kris Krohn, Nuworza Kugbey, Manasi Kumar, Pushpendra Kumar, Om Kurmi, Oluwatosin Kutu, Carlo La Vecchia, Sheetal D Lad, Dharmesh Lal, Aparna Lal, Faris Lami, Prabhat Lamichhane, Huong

375 Lan Nguyen, Justin Lang, Savita Lasrado, Georgy Lebedev, Shaun Lee, Paul Lee, Sonia Lewycka, Shanshan Li, Lee-Ling Lim, Melese Linger, Chi Linh Hoang, Shai Linn, Simin Liu, Rakesh Lodha, Jaifred Christian Lopez, Stefan Lorkowski, Eryln Rachele Macarayan, Mohamed Magdy Abdel Razek, Hassan Magdy Abdel Razek, Phetole Mahasha, Venkatesh Maled, Shokofeh Maleki, Navid Manafi, Ali Manafi, Farzad Manafi, Narendar Manohar, Fariborz Mansour-Ghanaei,

380 Borhan Mansouri, Mohammad Ali Mansournia, Christopher Chabila Mapoma, Dadi Marami, Carlos Marrugo, Francisco Rogerlândio Martins-Melo, Anthony Masaka, Pallab K Maulik, Benjamin Mayala, Mohsen Mazidi, Birhanu Geta Meharie, Man Mohan Mehndiratta, Kala M Mehta, Wahengbam Bigyananda Meitei, Teferi Mekonnen, Feleke Mekonnen, Hagazi Gebre Meles, Addisu Melese, Walter Mendoza, Ritesh G Menezes, Meresa Mengesha, Tuomo

385 Meretoja, Tomasz Miazgowski, Keadnew Mulatu Mihretie, Neda Milevska Kostova, Ted R Miller, Edward Mills, GK Mini, Biniam Minuye, Mohammad Miri, Hamed Mirjalali, Roya Mirzaei, Hamed Mirzaei, Mehdi Mirzaei-Alavijeh, Prasanna Mithra, Babak Moazen, Efat Mohamadi, Amjad Mohamadi Bolbanabad, Dara Mohammad, Naser mohammad gholi mezerji, Shadieh Mohammadi, Abdollah Mohammadian-Hafshejani, Reza Mohammadpourhodki, Shafiu

390 Mohammed, Ammas Mohammed, Yousef Mohammed, Salahuddin Mohammed, Jemal Abdu Mohammed, Farnam Mohebi, Amin Mokari Yamchi, Ali Mokdad, Julio Montañez, Pablo Montero-Zamora, Masoud Moradi, Yousef Moradi, Ghobad Moradi, Mohammad Moradi-Joo, Maziar Moradi-Lakeh, Farhad Moradpour, Rahmatollah Moradzadeh, Paula Moraga, Shane Morrison, Jonathan Mosser, Dariush Mozaffarian, Ulrich Mueller, Christopher J L Murray, GVS

395 Murthy, Kamarul Imran Musa, Ghulam Mustafa, Saravanan Muthupandian, Mehdi Naderi, Mehdi Naderi, Seyed Sina Naghibi Irvani, Aliya Naheed, Gurudatta Naik, Farid Najafi, Jobert Richie Nansseu, K M Venkat Narayan, Vinod C Nayak, Duduzile Ndwandwe, Ionut Negoii, Ruxandra Irina Negoii, Josephine Ngunjiri, jing nie, Dabere Nigatu, Yeshambel Nigatu, Zelalem Nigussie, Dina Nur Anggraini Ningrum, Chukwudi Nnaji, Christoph Nowak, Richard Ofori-Asenso,

400 In-Hwan Oh, Olanrewaju Oladimeji, Andrew T Olagunju, Tinuke O Olagunju, Bolajoko Olusanya, Jacob Olusanya, Mojisola Oluwasanu, Ahmed Omar Bali, Obinna Onwujekwe, Kwaku Oppong Asante, Orish Ebere Orisakwe, Alberto Ortiz, Osayomwanbo Osarenotor, Aaron Osgood-Zimmerman, Mayowa Owolabi, Mahesh P A, Dr Jagadish Rao Padubidri, Adrian Pana, Songhomitra Panda-Jonas, Tahereh Pashaei, Deepak Kumar Pasupula, Sangram Kishor Patel,

405 Mona Pathak, Dr Sanghamitra Pati, George Patton, Kebreab Paulos, Hamidreza Pazoki, Veincent Christian Pepito, Norberto Perico, Huyen Phuc Do, David Pigott, Bakhtiar Piroozi, Meghdad Pirsahab, Meghdad Pirsahab, Khem Narayan Pokhrel, Maarten Postma, Hadi Pourjafar, Farshad Pourmalek, Sergio Prada, Liliana Lucia Preotescu, Dimas Ria Angga Pribadi, Navid Rabiee,

Mohammad Rabiee, Amir Radfar, Alireza Rafiei, Fakher Rahim, Vafa Rahimi-Movaghar,  
410 Muhammad Aziz Rahman, Rajesh Kumar Rai, Ali Rajabpour-Sanati, Fatemeh Rajati, Kiana  
Ramezanzadeh, Saleem Rana, Chhabi Lal Ranabhat, Sowmya J Rao, Vahid Rashedi, Prateek  
Rastogi, Priya Rathi, Salman Rawaf, David Rawaf, Lal Rawal, Reza Rawassizadeh, Giuseppe  
Remuzzi, Vishnu Renjith, Andre Renzaho, Bhageerathy Reshmi, Serge Resnikoff, Nima Rezaei,  
415 Shahab Rezaeian, Aziz Rezapour, Seyed Mohammad Riahi, Ana Isabel Ribeiro, Jennifer Rickard,  
Alina Rodriguez, Leonardo Roever, Elias Roro, Gholamreza Roshandel, Ali Rostami, Sadegh  
Rostamnia, Siamak Sabour, Ehsan Sadeghi, Yahya Safari, Rajesh Sagar, Amirhossein Sahebkar,  
Biniyam Sahiledengle, Mohammad Ali Sahraian, S Mohammad Sajadi, Marwa Salem, Hosni  
Salem, Marwa Salem, Yahya Salimi, Hamideh Salimzadeh, Evanson Z Sambala, Abdallah M  
420 Samy, Itamar Santos, Benn Sartorius, Arash Sarveazad, Brijesh Sathian, Maheswar Satpathy,  
Sonia Saxena, Mehdi Sayyah, Alyssa Sbarra, Maria Inês Schmidt, Aletta E Schutte, David C  
Schwebel, Anbissa Muleta Senbeta, Subramanian Senthilkumaran, Seyedmojtaba  
Seyedmousavi, Faramarz Shaahmadi, Omid Shafaat, Saeed Shahabi, Masood Ali Shaikh, Ali  
Shalash, Jebreil Shamseddin, Amir Shamshirian, Morteza Shamsizadeh, Mohd Shannawaz,  
425 Kiomars Sharafi, Mehdi Sharif, Hatem Shehata, Abbas Sheikhtaheri, Keni Shibuya, Wondimeneh  
Shiferaw, Mika Shigematsu, Jae Il Shin, Reza Shirkoohi, Ivy Shiue, Shivakumar KM Shivakumar  
KM, Kerem Shuval, Soraya Siabani, Tariq Jamal Siddiqi, Diego Augusto Santos Silva, Biagio  
Simonetti, Jasvinder Singh, Virendra Singh, Ambrish Singh, Dharendra Narain Sinha, Yitagesu  
Sintayehu, Malede Mequanent Sisay, Amin Soheili, Bijan Soleymani, Farzaneh Soltani, Shahin  
430 Soltani, JB Soriano, Muluken Sorrie, Sergey Soshnikov, Ireneous Soyiri, Adel Spotin,  
Chandrashekhar T Sreeramareddy, Antonina Starodubova, Antonina Starodubova, Agus  
Sudaryanto, Muawiyah Babale Sufiyan, Hafiz Ansar Rasul Suleria, Rizwan Suliankatchi  
Abdulkader, Bruno Sunguya, Bryan L Sykes, Takahiro Tabuchi, Birkneh Tilahun Tadesse, Zemenu  
Tadesse, Koku Tamirat, Segen Tassew, Cuong Tat Nguyen, Nuno Taveira, Girmay Teklay,  
435 Michael Temene, Mohamad-Hani Temsah, Abdullah Terkawi, Nihal Thomas, Kenean Getaneh  
Tlaye, Hamid Reza Tohidinik, Marcello Tonelli, Marcos Roberto Tovani-Palone, Bach Tran, Khanh  
Bao Tran, Manjari Tripathi, Reta Tsegaye, Riaz Uddin, Irfan Ullah, Bhaskaran Unnikrishnan, Era  
Upadhyay, Muhammad Shariq Usman, Olalekan Uthman, Marco Vacante, Masoud  
Vaezghasemi, Pascual Valdez, Santosh Varughese, Tommi Vasankari, Yasser Vasseghian,  
440 Narayanaswamy Venketasubramanian, Francesco Violante, Vasiliy Vlassov, Sebastian Vollmer,  
Yasir Waheed, Yuan-Pang Wang, Yafeng Wang, Haidong Wang, Mehran Shams-Beyranvand,  
Taweewat Wiangkham, Tissa Wijeratne, Haileab Fekadu Wolde, Dawit Zewdu Wondafrash,  
Adam Wondmieneh, Ai-Min Wu, Gelin Xu, Abbas Yadegar, Ali Yadollahpour, Yuichiro Yano,  
445 Sanni Yaya, Vahid Yazdi-Feyzabadi, Alex Yeshaneh, Yigizie Yeshaw, Mekdes Yilma, Mekdes  
Yilma, Nigus Bililign Yimer, Paul Yip, Naohiro Yonemoto, Seok-Jun Yoon, Yoosik Youm, Mustafa  
Younis, Zabihollah Yousefi, Chuanhua Yu, Hasan Yusefzadeh, Telma Zahirian Moghadam, Leila  
Zaki, Sojib Bin Zaman, Maryam Zamanian, Hamed Zandian, Alireza Zangeneh, Nejimu Zepro,  
Taddese Zerfu, Taye Abuhay Zewale, Yunquan Zhang, Zhi-Jiang Zhang, Arash Ziapour, Sanjay  
Zodpey, Kamiar Zomorodian, Francis Zotor

450

## Drafting the manuscript or revising it critically for important intellectual content

Jennifer Ross, Sandra Munro, Lauren Schaeffer, Mahdiah Abbasalizad-Farhangi, Masoumeh Abbasi, Hedayat Abbastabar, Kedir Abegaz, Lucas Guimarães Abreu, Isaac Adedeji, Victor Adekanmbi, Abiodun Adeoye, Olatunji Adetokunboh, Davoud Adham, Pana Adrian, Mohsen Afarideh, Mohammad Aghaali, Sepideh Ahmadi, Mukhtar Ahmed, Rushdia Ahmed, Dessalegn Ajema, Tomi Akinyemiju, Blessing Akombi, Samiah Alam, Genet Melak Alamene, Beriwan Ali, Cyrus Alinia, Hesam Alizade, Syed Aljunid, Amir Almasi-Hashiani, Hesham Al-Mekhlafi, Azmeraw T Amare, Adeladza Amegah, Saeed Amini, Nahla Anber, Robert Ancuceanu, Catalina Liliana Andrei, Carl Abelardo Antonio, Jalal Arabloo, Olatunde Aremu, Johan Ärnlov, Afsaneh Arzani, Mehran Asadi-Aliabadi, Ali Asadi-Pooya, Samaneh Asgari, Maha Atout, Marcel Ausloos, Euripide Avokpaho, Ashish Awasthi, Beatriz Paulina Ayala Quintanilla, Abbas Azadmehr, Ghasem Azarian, Ebrahim Babae, Alaa Badawi, Shankar Bakkannavar, Senthilkumar Balakrishnan, Maciej Banach, Agegnehu Bante, Till Bärnighausen, Huda Basaleem, Sanjay Basu, Mohsen Bayati, Dereje Bayissa, Neeraj Bedi, Derrick Bennett, Kidanemariam Berhe, Adam Berman, Krittika Bhattacharyya, Boris Bikbov, Antonio Biondi, Zebenay Workneh Bitew, Tone Bjørge, Antonio Maria Borzì, Oliver Brady, Dejana Braithwaite, Gabrielle Britton, Shyam Sundar Budhathoki, Sharath Burugina Nagaraja, Reinhard Busse, Alessandra C Goulart, Lucero Cahuana-Hurtado, Luis Alberto Camera, Ismael Campos-Nonato, Jorge Cano, Josip Car, Juan J Carrero, Félix Carvalho, João Mauricio Castaldelli-Maia, Franz Castro, Ester Cerin, Pranab Chatterjee, Bal Govind Chauhan, Bal Govind Chauhan, Mohammad Chehrazi, Devasahayam Christopher, Flavia Cicuttini, Paolo Angelo Cortesi, Vera M Costa, Ewerton Cousin, Giovanni Damiani, Amira Hamed Darwish, Ahmad Daryani, Nicole Davis Weaver, Jan-Walter De Neve, Desta Debalkie Atnafu, Asmamaw Demis, Dereje Demissie, Edgar Denova-Gutiérrez, Nebiyu Dereje, Rupak Desai, Samath Dharmaratne, Govinda Dhungana, Mostafa Dianatinasab, Daniel Diaz, Zahra Sadat Dibaji Forooshani, Isaac Oluwafemi Dipeolu, Hoa Do Thi, Paul Narh Doku, Leila Doshmangir, Manisha Dubey, Bruce Duncan, Aziz Eftekhari, Iman El Sayed, Maysaa El Sayed Zaki, Maha El Tantawi, Iffat Elbarazi, Aisha Elsharkawy, Mohammad Hassan Emamian, Shymaa Enany, Tewodros Eshete, Khalil Eskandari, Sharareh Eskandarieh, Saman Esmaeilnejad, Alireza Esteghamati, Arash Etemadi, Andrea Farioli, Andre Faro, Hossein Farzam, Joao Fernandes, Eduarda Fernandes, Irina Filip, Florian Fischer, Carsten Flohr, Nataliya Foigt, Morenike Folayan, Artem Fomenkov, Artem Fomenkov, Masoud Foroutan, Joel Francis, Takeshi Fukumoto, Kidane Tadesse Gebremariam, Gebreamlak Gebremeskel, Gebrekiros Gebremichael, Gebretsadkan Gebretsadik, Getnet Gedefaw, Ayele Geleto, Hailay Gesesew, Fatemeh Ghaffarifar, Mansour Ghafourifard, Ahmad Ghashghaee, Fariba Ghassemi, Tiffany K Gill, Yordanos Gizachew, Sameer Gopalani, Ayman Grada, Michal Grivna, Rafael Guimarães, Yuming Guo, Rajat Das Gupta, Rajeev Gupta, Rahul Gupta, Nima Hafezi-Nejad, Michael Tamene Haile, Arya Haj-Mirzaian, Brian Hall, Demelash Woldeyohannes Handiso, Graeme Hankey, Ahmed Hasaballah, Milad Hasankhani, Amir Hasanzadeh, Amir Hasanzadeh, Maryam Hashemian, Hamid Y Hassen, Rasmus Havmoeller, Corinna Hawkes, Andualem Henok, Claudiu Herteliu, Hagos Hidru, Chi Hoang Linh, Michael Hole, Ramesh Holla, Enayatollah Homaie Rad, Praveen Hoogar, Masako Horino, Naznin Hossain, Mostafa Hosseini, Sorin Hostiuc, Mihaela Hostiuc, Guoqing Hu, Ayesha Humayun, Bing-Fang Hwang, Segun Emmanuel Ibitoye, Abdelrahman Ibrahim Abushouk, Olayinka Ilesanmi, Milena Ilic, Mohammad-Hasan Imani-Nasab, Sheikh Mohammed Shariful Islam, Chidozie Iwu, Neda Izadi, Nader Jafaribalalami, Morteza Jafarinia, Mihajlo Jakovljevic, Ahamarshan Jayaraman

495 Nagarajan, Achala Jayatilleke, Ensiyeh Jenabi, Ravi Prakash Jha, Vivekanand Jha, John Ji, Jost B Jonas, Nitin Joseph, Jacek Jozwiak, Mikk Jürisson, Ali Kabir, Hossein Samadi Kafil, André Karch, Mohd Anisul Karim, Amir Kasaeian, Habtamu Kasaye, Habtamu Kasaye, Nicholas Kassebaum, Yousef Khader, Morteza Abdullatif Khafaie, Rovshan Khalilov, Md Nuruzzaman Khan, Ejaz Khan, Mohammad Saud Khan, Muhammad Shahzeb Khan, Mona Khater, Mahalaqua Nazli Khatib,

500 Mohammad Khazaei, Mohammad Taghi Khodayari, Ali Kiadaliri, Neda Kianipour, Daniel Kiirithio, Yun Jin Kim, Adnan Kisa, Tufa Kolola, Hamidreza Komaki, Parvaiz Koul, Ai Koyanagi, Moritz Kraemer, Kewal Krishan, Kris Krohn, Nuworza Kugbey, Vivek Kumar, Om Kurmi, Ben Lacey, Huong Lan Nguyen, Justin Lang, Savita Lasrado, Paul Lee, Shanshan Li, Lee-Ling Lim, Chi Linh Hoang, Simin Liu, Joshua Longbottom, Jaifred Christian Lopez, Mohammed Madadin,

505 Mohamed Magdy Abdel Razek, Hassan Magdy Abdel Razek, Phetole Mahasha, Venkatesh Maled, Shokofeh Maleki, Afshin Maleki, Navid Manafi, Ali Manafi, Farzad Manafi, Borhan Mansouri, Dadi Marami, Francisco Rogerlândio Martins-Melo, Benjamin Massenburg, Mohsen Mazidi, Wahengbam Bigyananda Meitei, Feleke Mekonnen, Walter Mendoza, Ritesh G Menezes, Tuomo Meretoja, Tomasz Miazgowski, Ted R Miller, Edward Mills, Seyed Mostafa

510 Mir, Mohammad Miri, Roya Mirzaei, Prasanna Mithra, Babak Moazen, Dara Mohammad, Karzan Mohammad, Shadieh Mohammadi, Abdollah Mohammadian-Hafshejani, Mousa Mohammadnia-Afrouzi, Reza Mohammadpourhodki, Shafiu Mohammed, Yousef Mohammed, Jemal Abdu Mohammed, Farnam Mohebi, Ali Mokdad, Masoud Moradi, Maziar Moradi-Lakeh, Rahmatollah Moradzadeh, Paula Moraga, Shane Morrison, Abbas Mosapour, Jonathan Mosser,

515 Simin Mouodi, Dariush Mozaffarian, Christopher J L Murray, Kamarul Imran Musa, Ghulam Mustafa, Behnam Nabavizadeh, Mehdi Naderi, Mehdi Naderi, Girish Nadkarni, Seyed Sina Naghibi Irvani, Farid Najafi, Jobert Richie Nansseu, Bruno Nascimento, Vinod C Nayak, Ionut Negoii, Ruxandra Irina Negoii, Josephine Ngunjiri, Dabere Nigatu, Yeshambel Nigatu, Zelalem Nigussie, Jean Jacques Noubiap, Christoph Nowak, Onome Oghenetega, In-Hwan Oh,

520 Olanrewaju Oladimeji, Morteza Oladnabi, Andrew T Olagunju, Tinuke O Olagunju, Bolajoko Olusanya, Jacob Olusanya, Mojisola Oluwasanu, Obinna Onwujekwe, Eyal Oren, Alberto Ortiz, Osayomwanbo Osarenotor, Mayowa Owolabi, Mahesh P A, Dr Jagadish Rao Padubidri, Adrian Pana, Songhomitra Panda-Jonas, Hadi Parsian, Mona Pathak, Dr Sanghamitra Pati, Veincent Christian Pepito, Huyen Phuc Do, David Pigott, Majid Pirestani, Maarten Postma, Farshad

525 Pourmalek, Sergio Prada, Liliana Lucia Preotescu, Zahiruddin Syed Quazi, Navid Rabiee, Mohammad Rabiee, Amir Radfar, Fakher Rahim, Vafa Rahimi-Movaghar, Muhammad Aziz Rahman, Ali Rajabpour-Sanati, Fatemeh Rajati, Saleem Rana, Chhabi Lal Ranabhat, Sowmya J Rao, Davide Rasella, Priya Rathi, Lal Rawal, Sarah Ray, Vishnu Renjith, Andre Renzaho, Bhageerathy Reshmi, Nima Rezaei, Mohammad Sadegh Rezai, Seyed Mohammad Riahi, Ana

530 Isabel Ribeiro, Jennifer Rickard, Leonardo Roever, Sadegh Rostamnia, Anas Saad, Yogesh Sabde, Siamak Sabour, Masoumeh Sadeghi, Saeed Safari, Yahya Safari, Rajesh Sagar, Biniyam Sahiledengle, Mohammad Ali Sahraian, Nasir Salam, Farkhonde Salehi, Saleh Salehi Zahabi, Marwa Salem, Hosni Salem, Hamideh Salimzadeh, Abdallah M Samy, Itamar Santos, Abdur Razzaque Sarker, Arash Sarveazad, Maheswar Satpathy, Sonia Saxena, Maria Inês Schmidt,

535 Aletta E Schutte, David C Schwebel, Seyedmojtaba Seyedmousavi, Omid Shafaat, Saeed Shahabi, Ali Shalash, Mehdi Sharif, Rajesh Sharma, Abbas Sheikhtaheri, Reza Shirkoohi, Shivakumar KM Shivakumar KM, Kerem Shuval, Tariq Jamal Siddiqi, Inga Dora Sigfusdottir, Rannveig Sigurvinsdottir, Diego Augusto Santos Silva, Biagio Simonetti, Pankaj Kumar Singh,

540 Jasvinder Singh, Yitagesu Sintayehu, Amin Soheili, Farzaneh Soltani, Mojtaba Soltani, JB Soriano,  
Muluken Sorrie, Chandrashekhar T Sreeramareddy, Antonina Starodubova, Muawiyah Babale  
Sufiyan, Gerhard Sulo, Bryan L Sykes, Rafael Tabarés-Seisdedos, Takahiro Tabuchi, Segen  
Tassew, Cuong Tat Nguyen, Nuno Taveira, Gebretsadkan Hintsu Tekulu, Michael Temene, Nihal  
Thomas, Maria Titova, Maria Titova, Hamid Reza Tohidinik, Marcello Tonelli, Marcos Roberto  
545 Tovani-Palone, Bach Tran, Khanh Bao Tran, Riaz Uddin, Irfan Ullah, Bhaskaran Unnikrishnan, Era  
Upadhyay, Muhammad Shariq Usman, Olalekan Uthman, Marco Vacante, Sahel Valadan  
Tahbaz, Santosh Varughese, Tommi Vasankari, Yasser Vasseghian, Yousef Veisani,  
Narayanawamy Venketasubramanian, Simone Vidale, Vasiliy Vlassov, Rade Vukovic, Yuan-Pang  
Wang, Mehran Shams-Beyranvand, Haileab Fekadu Wolde, Dawit Zewdu Wondafrash, Ai-Min  
Wu, Hossein Yahyazadeh, Vahid Yazdi-Feyzabadi, Tomas Yeheyis, Mekdes Yilma, Mekdes Yilma,  
550 Naohiro Yonemoto, Hebat-Allah Yousof, Telma Zahirian Moghadam, Sojib Bin Zaman, Maryam  
Zamanian, Alireza Zangeneh, Zhi-Jiang Zhang, Xiu-Ju Zhao, Mojtaba Ziaee

555 [Management of the overall research enterprise \(for example, through membership in the  
Scientific Council\)](#)

Davoud Adham, Mohammad Aghaali, Hesam Alizade, Fatemeh Amiri, Nahla Anber,  
Govindakarnavar Arunkumar, Babak Asghari, Ghasem Azarian, Atif Amin Baig, Deborah  
Carvalho Malta, Giovanni Damiani, Desta Debalkie Atnafu, Aziz Eftekhari, Arash Etemadi,  
Fateme Ezzatifar, Artem Fomenkov, Artem Fomenkov, Yordanos Gizachew, Rezvan Goodarzi,  
560 Amir Hasanzadeh, Morteza Jafarinia, Fyezah Jehan, Maryam Khayamzadeh, Kris Krohn, Van  
Lansingh, Borhan Mansouri, Mohsen Mazidi, George Mensah, Maryam Mirzaei, Shadie  
Mohammadi, Ali Mokdad, Masoud Moradi, Girish Nadkarni, Mohsen Naghavi, Javad Nazari,  
Bolajoko Olusanya, Jacob Olusanya, Deepak Kumar Pasupula, George Patton, Ali Rajabpour-  
Sanati, Saleem Rana, Priya Rathi, Vishnu Renjith, Seyed Mohammad Riahi, Yahya Safari, Rajesh  
565 Sagar, Abdur Razzaque Sarker, Benn Sartorius, Mehdi Sayyah, Faramarz Shaahmadi, Keni  
Shibuya, Pushpendra Singh, Yitagesu Sintayehu, Farzaneh Soltani, Degen Tadesse, Maria  
Titova, Maria Titova, Era Upadhyay, Yasser Vasseghian

570
